# Supplementary material for: Accessible protocol for asymmetric hydroformylation of vinylarenes using formaldehyde
Source: Royal Society of Chemistry journal article supplement (doi:10.1039/c5ob00378d), 2015-01-01

## Supplementary information 2

### Accessible protocol for asymmetric hydroformylation of vinylarenes using formaldehyde

Tsumoru Morimoto,\* Tetsuji Fujii, Kota Miyoshi, Gouki Makado, Hiroki Tanimoto,  
Yasuhiro Nishiyama, and Kiyomi Kakiuchi

*Graduate School of Materials Science, Nara Institute of Science and Technology (NAIST),*

*Ikoma, Nara 630-0192*

*morimoto@ms.naist.jp*

### Table of Contents

|                                                                                                                                                                                      |     |
|--------------------------------------------------------------------------------------------------------------------------------------------------------------------------------------|-----|
| 1. General considerations                                                                                                                                                            | S2  |
| 2. Materials                                                                                                                                                                         | S2  |
| 3. Representative procedure for the asymmetric hydroformylation of vinylarenes using formalin                                                                                        | S3  |
| 4. Measurement of ee% of branched aldehydes                                                                                                                                          | S3  |
| 5. Determination of absolute configuration                                                                                                                                           | S3  |
| 6. GC and <sup>1</sup> H NMR analyses of the catalytic reaction of styrene with formalin in toluene-d <sub>8</sub>                                                                   | S4  |
| 7. <sup>13</sup> C-Labeled Experiments (Scheme 3)                                                                                                                                    | S5  |
| 8. Spectral data of vinylarenes <b>15</b> and <b>17</b>                                                                                                                              | S7  |
| 9. Spectral data of branched and linear aldehydes                                                                                                                                    | S8  |
| 10. Spectral data of branched and linear alcohols                                                                                                                                    | S17 |
| 11. HPLC Charts of Reductants of Aldehydes <b>2-B</b> , <b>4-B</b> , <b>6-B</b> , <b>8-B</b> , <b>10-B</b> , <b>12-B</b> , <b>14-B</b> , <b>16-B</b> , and <b>18-B</b>               | S26 |
| 12. References.                                                                                                                                                                      | S37 |
| 13. <sup>1</sup> H & <sup>13</sup> C NMR Charts of Vinylarenes <b>15</b> and <b>17</b>                                                                                               | S39 |
| 14. <sup>1</sup> H & <sup>13</sup> C NMR Charts of Aldehydes <b>4</b> , <b>6</b> , <b>8</b> , <b>10</b> , <b>12</b> , <b>14</b> , <b>16</b> , and <b>18</b>                          | S43 |
| 15. <sup>1</sup> H & <sup>13</sup> C NMR Charts of Reductants of Aldehydes <b>2</b> , <b>4</b> , <b>6</b> , <b>8</b> , <b>10</b> , <b>12</b> , <b>14</b> , <b>16</b> , and <b>18</b> | S79 |

13. <sup>1</sup>H & <sup>13</sup>C NMR Charts of Vinylarenes 15 and 17.

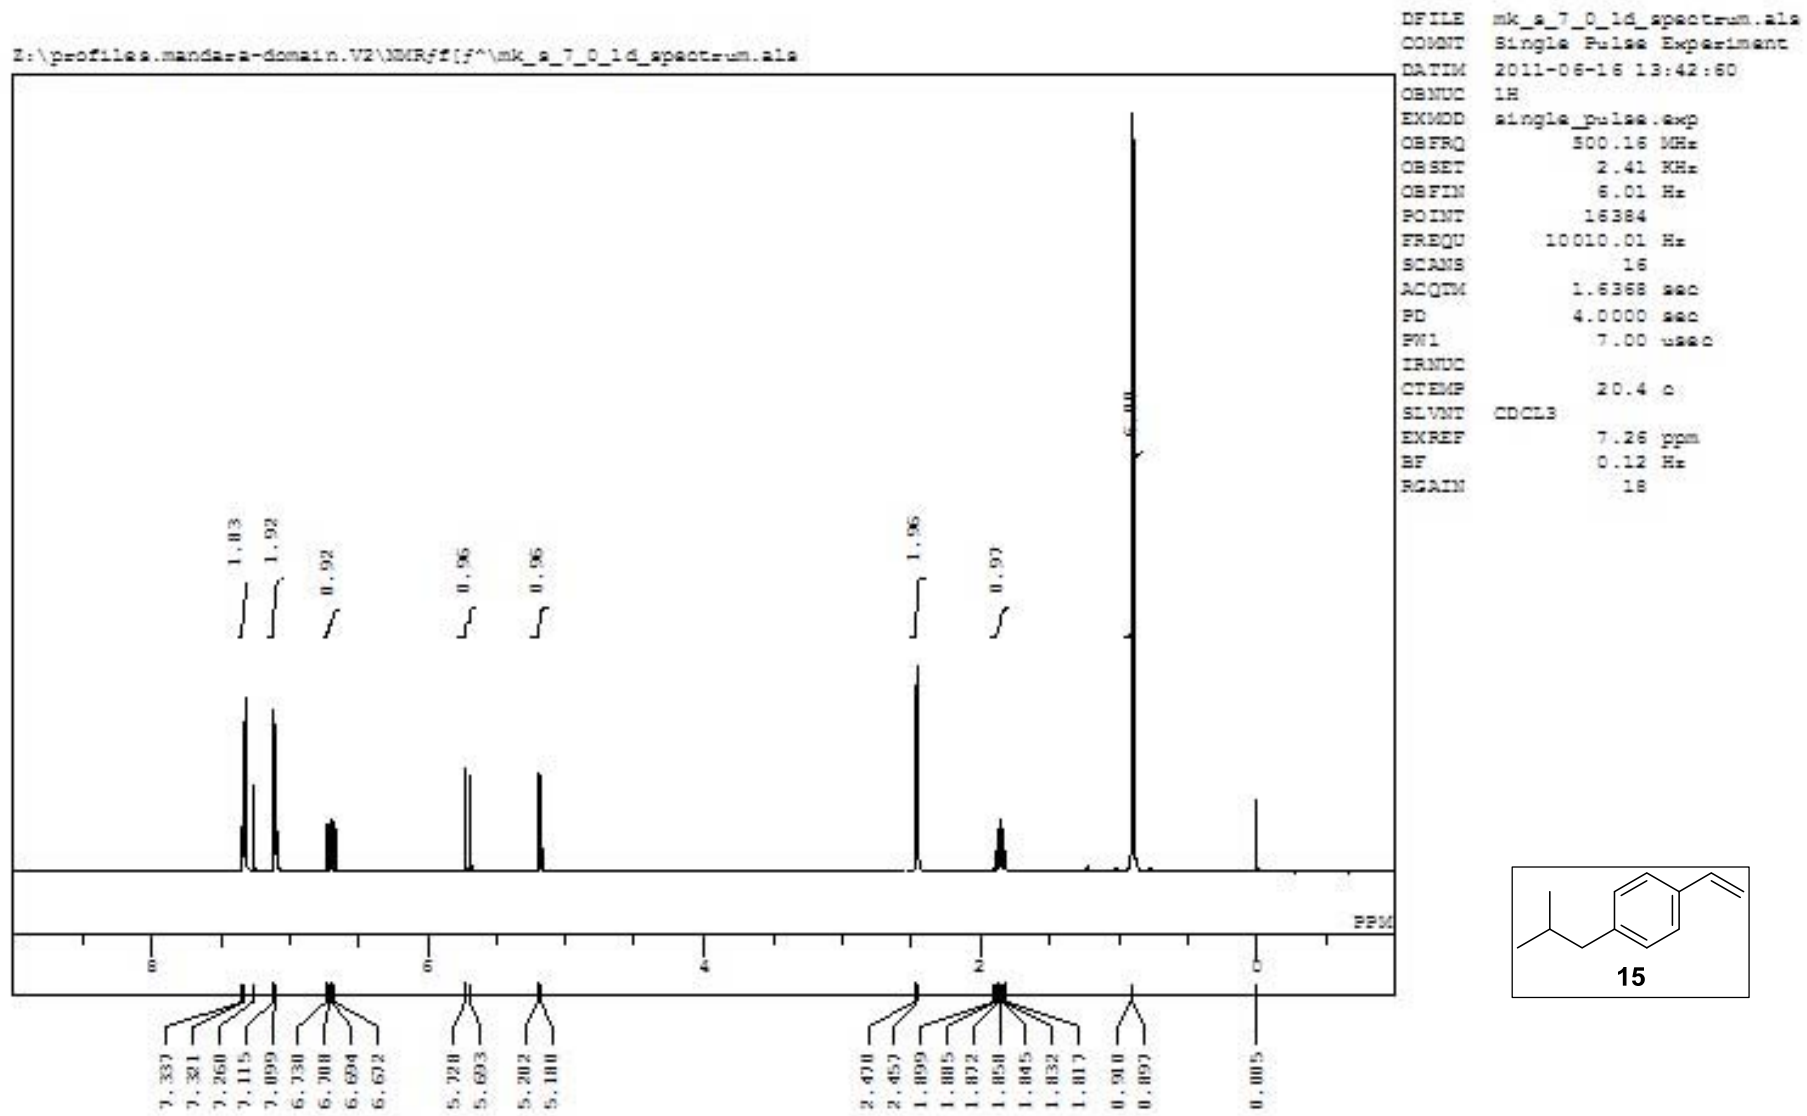

\\Fao-c08\orgchem-lab2\Team2\ (17) ZODI-4-22E23\N\Xj\ZAZzff\Alice\mk\_s\_7\_0\_13c\_spectrum.als

DFILE mk\_s\_7\_0\_13c\_spectrum.als  
COMMT Single Pulse with Broadband  
DATIM 2011-06-16 14:52:44  
CENUC 13C  
EXMOD single\_pulse\_dec  
OBFRQ 125.77 MHz  
OBSET 7.87 KHz  
OBFIN 4.21 Hz  
POINT 32768  
FREQU 31446.54 Hz  
SCANS 2000  
AQTM 1.0420 sec  
PD 1.0000 sec  
PWL 4.47 usec  
IRNUC 1H  
CTEMP 21.5 c  
SLVNT CDCL3  
EXREF 77.00 ppm  
BF 0.12 Hz  
RGAIN 28

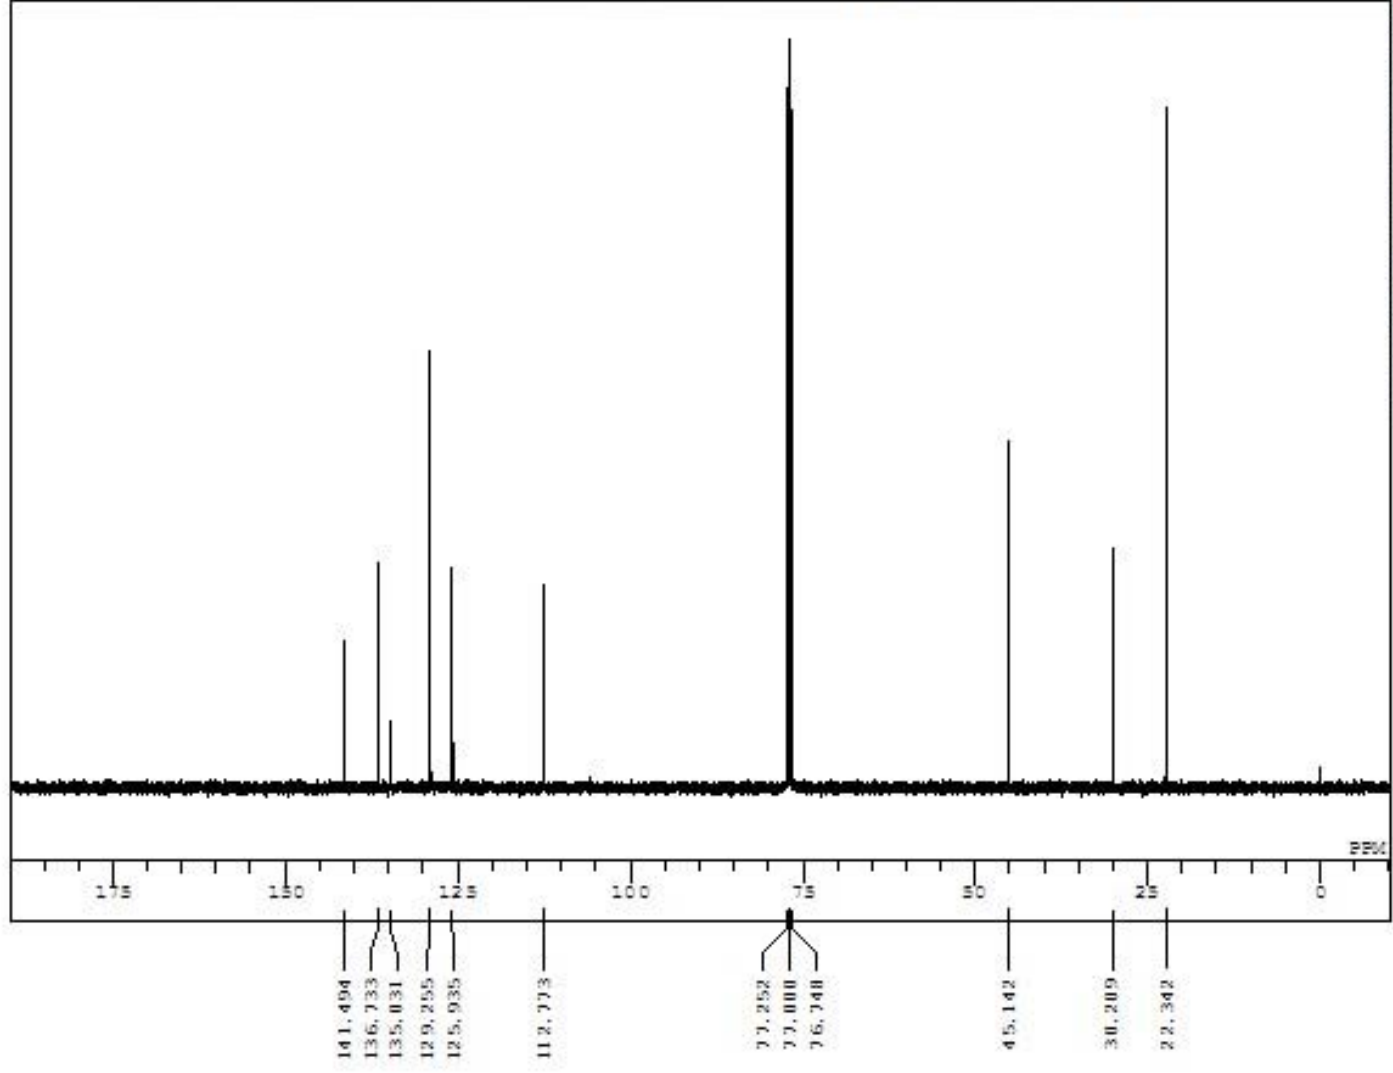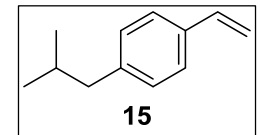

Z:\profiles.mandara-domain.V2\NMRff\mk\_a\_8\_0\_1d\_spectrum.ala

DFILE mk\_a\_8\_0\_1d\_spectrum.ala  
COMNT Single Pulse Experiment  
DATIM 2011-09-05 15:34:43  
OBNUC 1H  
EXMDD single\_pulse.exp  
OBFRQ 500.16 MHz  
OBSET 2.41 kHz  
OBFIN 6.01 Hz  
POINT 16384  
FREQU 10010.01 Hz  
SCANS 16  
ACQTM 1.6368 sec  
PD 4.0000 sec  
PW1 7.00 usec  
IRNUC  
OTEMP 20.1 c  
SLVMT CDCL3  
EXREF 0.00 ppm  
BF 0.12 Hz  
RGAIN 18

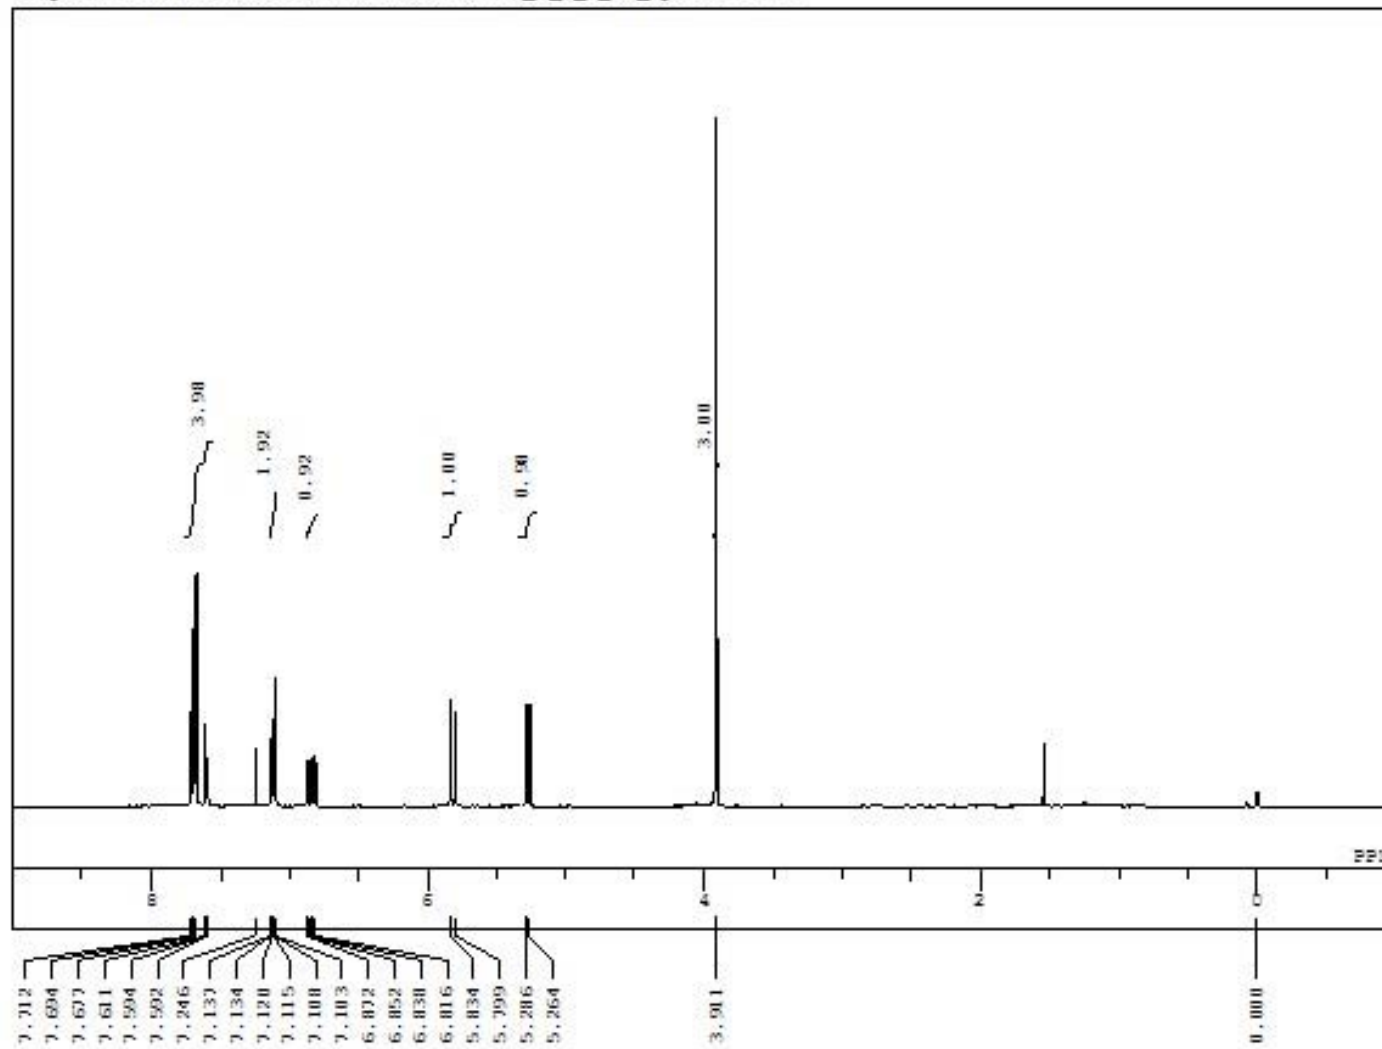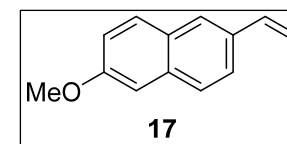

\\Fao-c08\orgchem-lab2\Team2\ (17) 2011-09-22 22:23:37\ZAGzff\Alice\mk\_s\_8\_0\_13c\_spectrum.als

DFILE mk\_s\_8\_0\_13c\_spectrum.als  
COMMT Single Pulse with Broadband  
DATIM 2011-09-05 16:43:59  
CENUC 13C  
EXMOD single\_pulse\_dec  
OBFRQ 125.77 MHz  
OBSET 7.87 KHz  
OBFIN 4.21 Hz  
POINT 32768  
FREQU 31446.54 Hz  
SCANS 2000  
AQTM 1.0420 sec  
PD 1.0000 sec  
FWL 4.47 usec  
IRNUC 1H  
CTEMP 22.7 c  
SLVNT CDCL3  
EKREF 77.00 ppm  
BF 0.12 Hz  
RGAIN 30

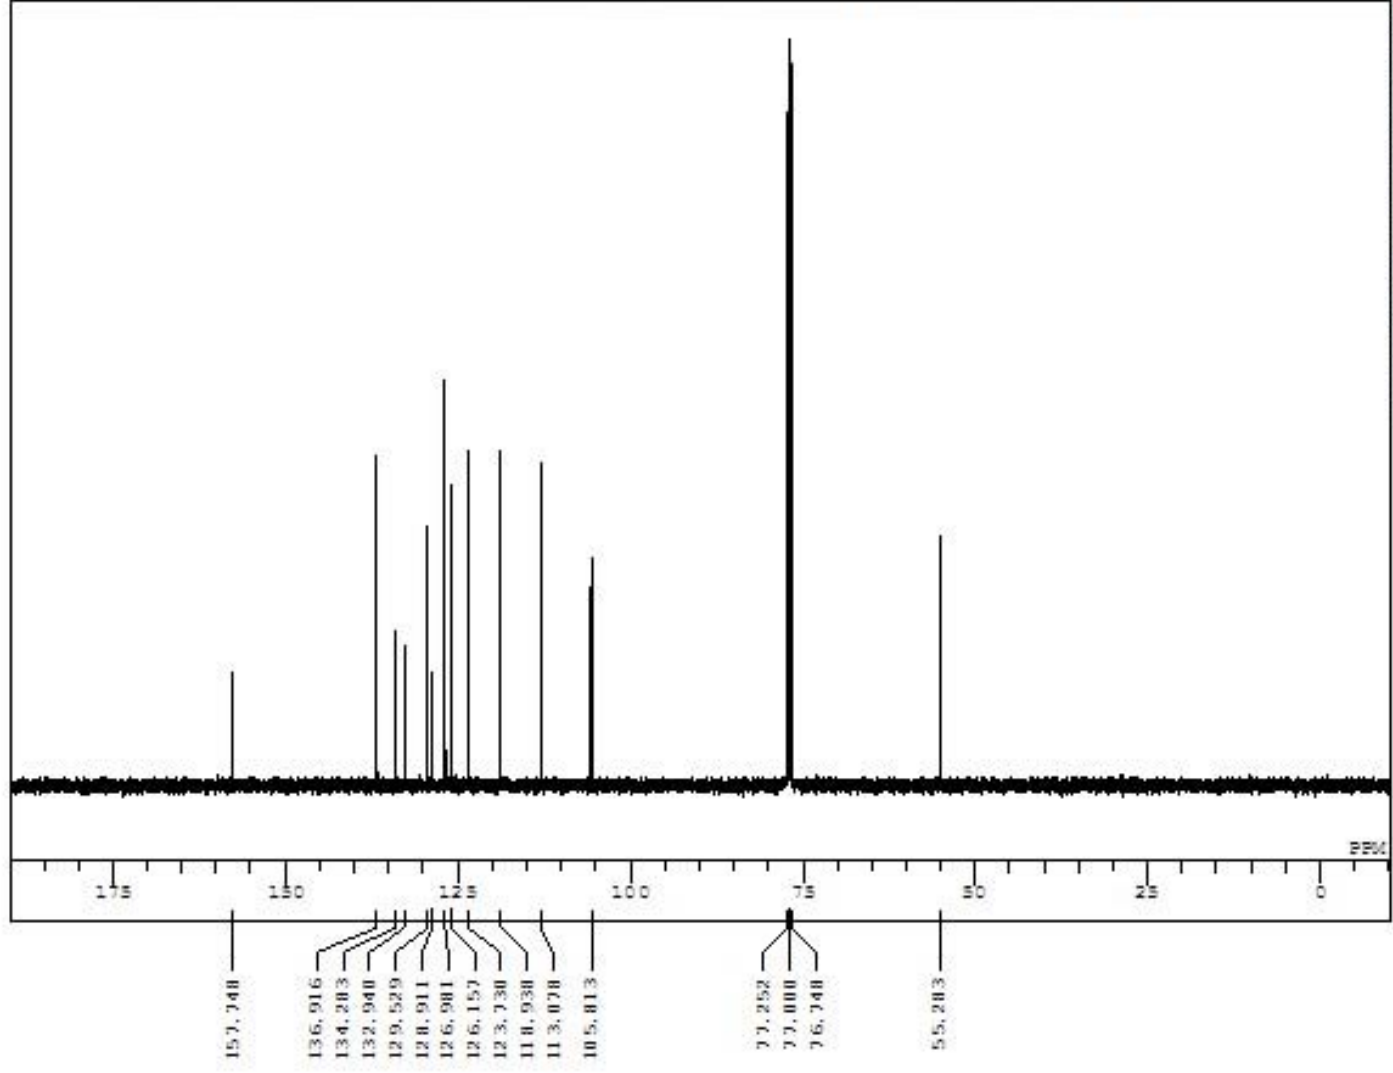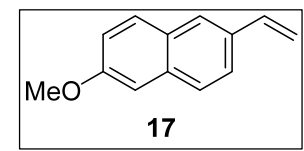

14. <sup>1</sup>H & <sup>13</sup>C NMR Charts of Aldehydes 4, 6, 8, 10, 12, 14, 16, and 18.

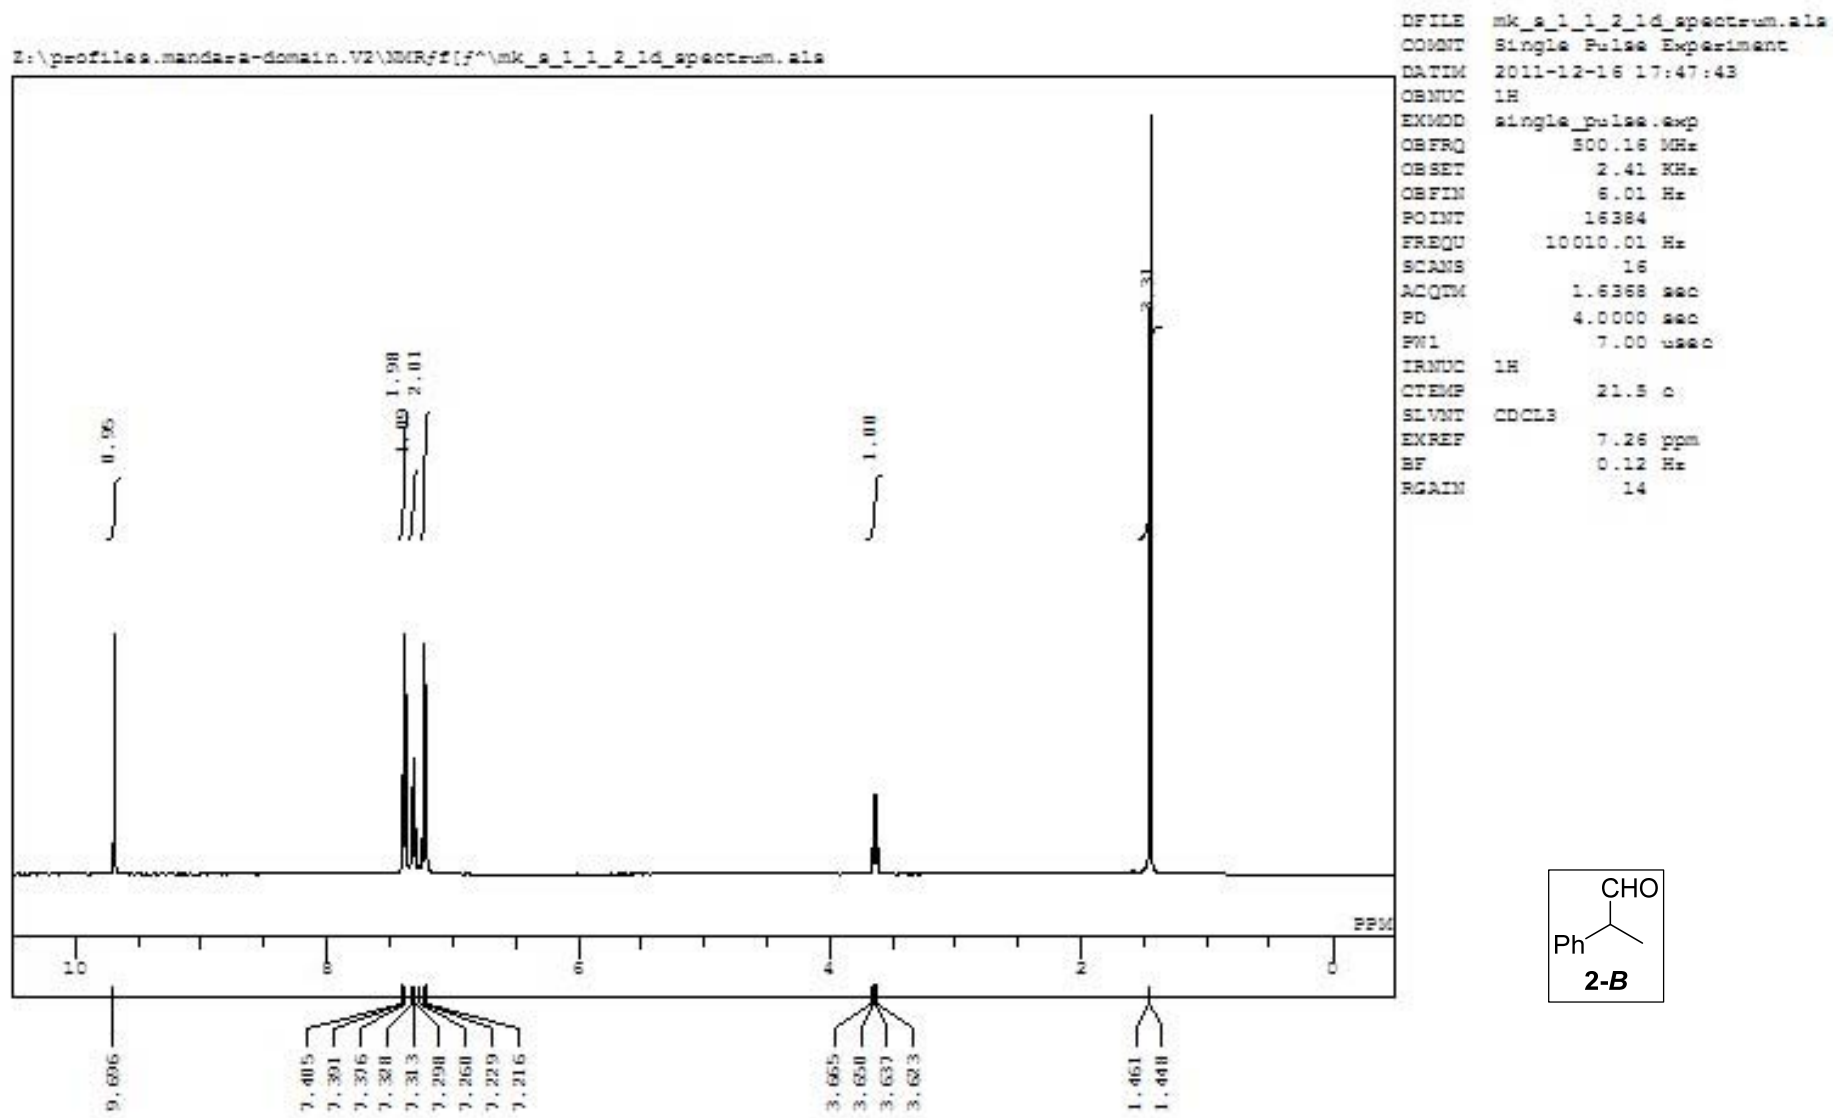

\\Fao-c08\orgchem-lab2\Team2\ (17) ZODI-k-2ZE23\W\*xj\ZAGzff\Alice\mk\_s\_1\_1\_13c\_spectrum.ala

DFILE mk\_s\_1\_1\_13c\_spectrum.ala  
COMNT Single Pulse with Broadband  
DATIM 2012-02-23 19:16:29  
CENUC 13C  
EXMOD single\_pulse\_dac  
OBFRQ 125.77 MHz  
OBSET 7.87 KHz  
OBPIN 4.21 Hz  
POINT 32768  
FREQU 31446.54 Hz  
SCANS 1400  
AQTM 1.0420 sec  
PD 1.0000 sec  
PWL 4.47 usec  
IRNUC 1H  
CTEMP 18.4 c  
SLVNT CDCL3  
EXREF 77.00 ppm  
BF 0.12 Hz  
RGAIN 29

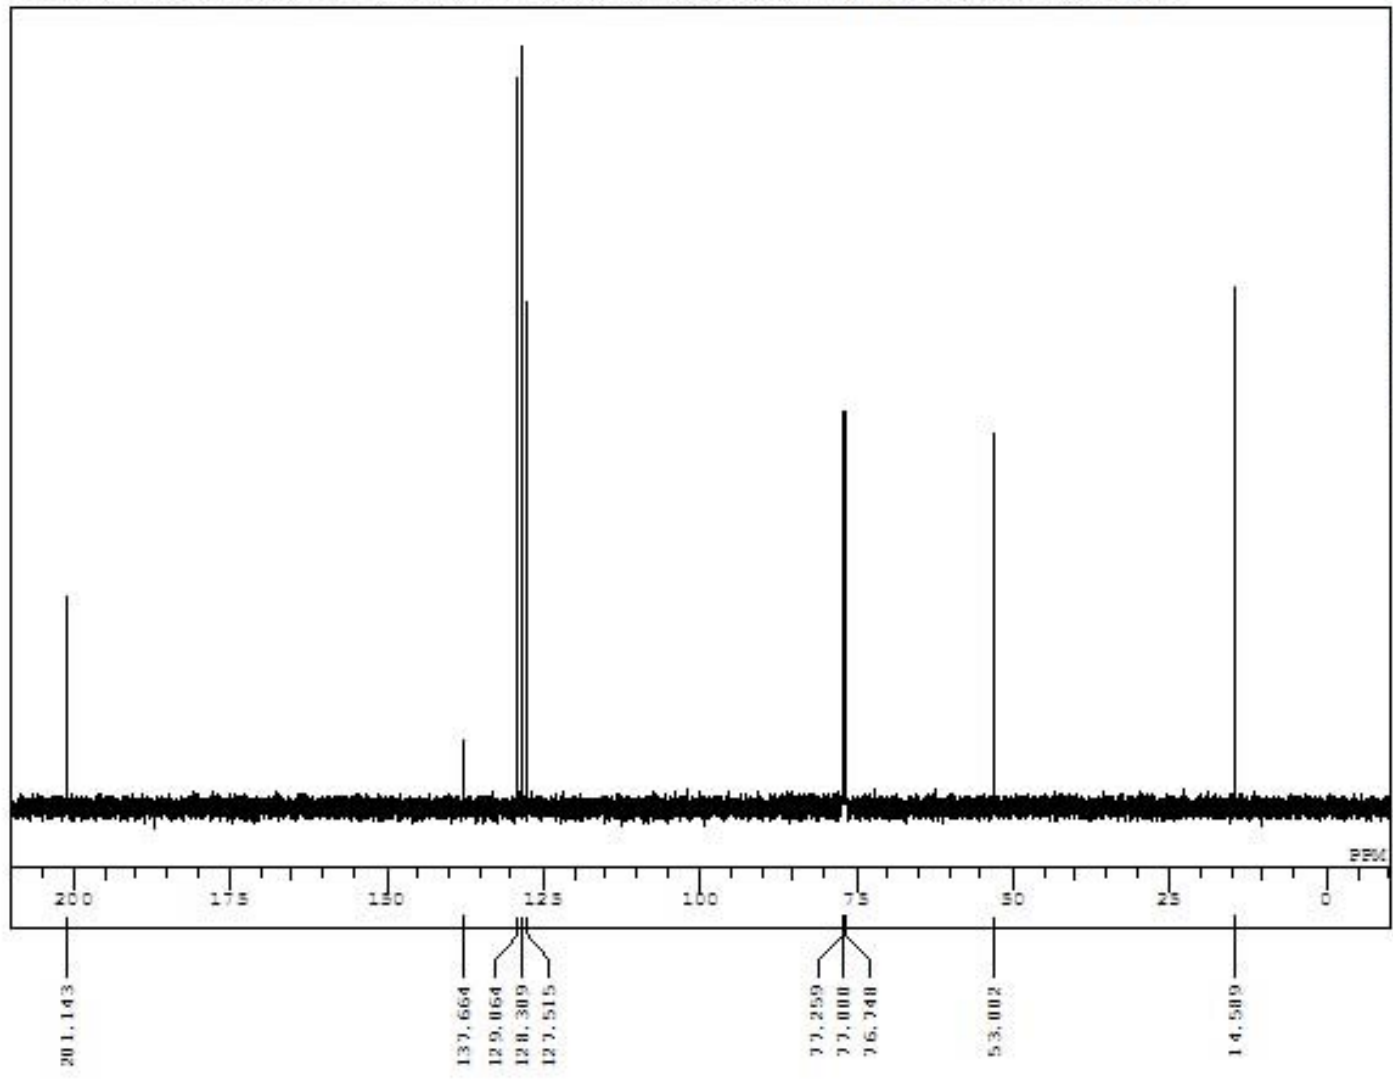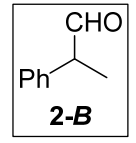

Z:\profiles.mandara-domain.V2\NMR\ff\mk\_a\_1\_2\_2\_1d\_spectrum.als

DFILE mk\_a\_1\_2\_2\_1d\_spectrum.als  
COMNT Single Pulse Experiment  
DATIM 2011-12-16 16:25:08  
OBNUC 1H  
EXMDD single\_pulse.exp  
OBFRQ 500.16 MHz  
OBSET 2.41 KHz  
OBFIN 6.01 Hz  
POINT 16384  
FREQU 10010.01 Hz  
SCANS 16  
ACQTM 1.6368 sec  
PD 4.0000 sec  
PW1 7.00 usec  
IRNUC 1H  
OTEMP 21.6 c  
SOLVT CDCL3  
EXREF 7.26 ppm  
BF 0.12 Hz  
RGAIN 14

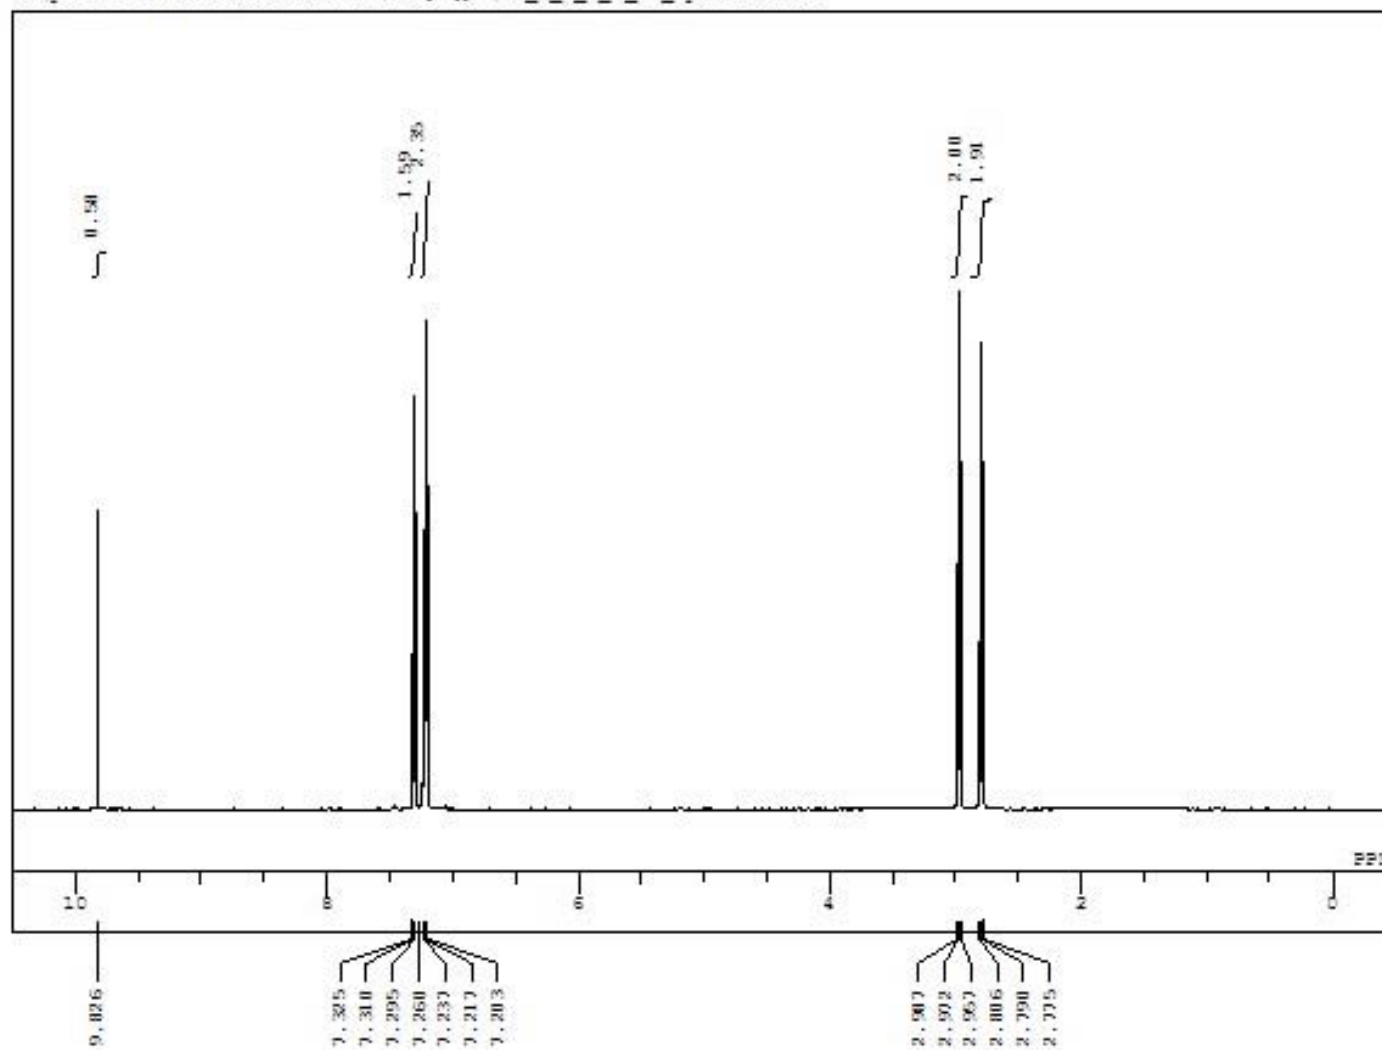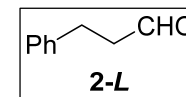



\\fso-c08\o-gchem-lab2\TeamG\17\ZODI-4-22E23\31\*xj\ZAGzff(f^)\Alice\mk\_a\_1\_2\_13c\_spectrum.ala

DFILE mk\_a\_1\_2\_13c\_spectrum.ala  
COMNT Single Pulse with Broadband  
DATIM 2012-02-22 16:14:21  
OBNUC 13C  
EXMOD single\_pulse\_dec  
OBFRQ 125.77 MHz  
OBSET 7.87 KHz  
OBFIN 4.21 Hz  
POINT 32768  
FREQU 31446.54 Hz  
SCANS 1800  
ACQTM 1.0420 sec  
PD 1.0000 sec  
PW1 4.47 usec  
IRNUC 1H  
OTEMP 22.0 c  
SOLVT CDCL3  
EXREF 77.00 ppm  
BF 0.12 Hz  
RGAIN 30

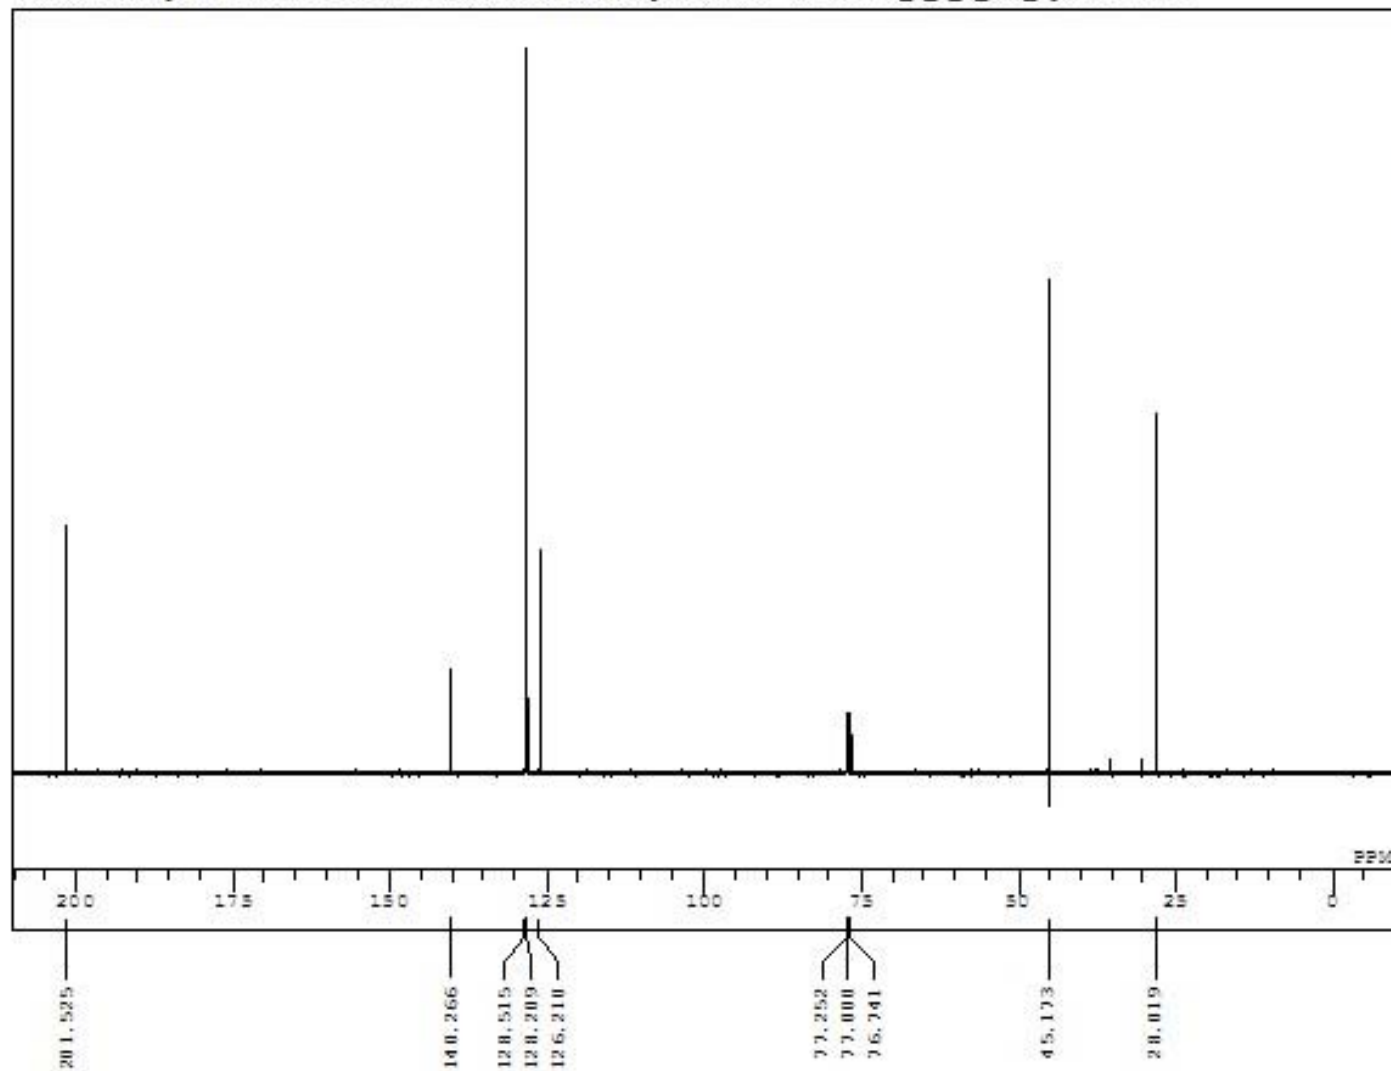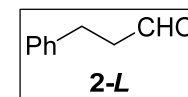

Z:\profiles.mandara-domain.V2\NMR\ff\mk\_a\_4\_1\_spectrum.als

DFILE mk\_a\_4\_1\_spectrum.als  
COMNT Single Pulse Experiment  
DATIM 2011-04-20 13:12:01  
OBNUC 1H  
EXMDD single\_pulse.exp  
OBFRQ 500.16 MHz  
OBSET 2.41 KHz  
OBFIN 6.01 Hz  
POINT 16384  
FREQU 10010.01 Hz  
SCANS 16  
ACQTM 1.6368 sec  
PD 4.0000 sec  
PW1 7.00 usec  
IRNUC 1H  
OTEMP 16.7 c  
SOLVT CDCL3  
EXREF 0.00 ppm  
BF 0.12 Hz  
RGAIN 18

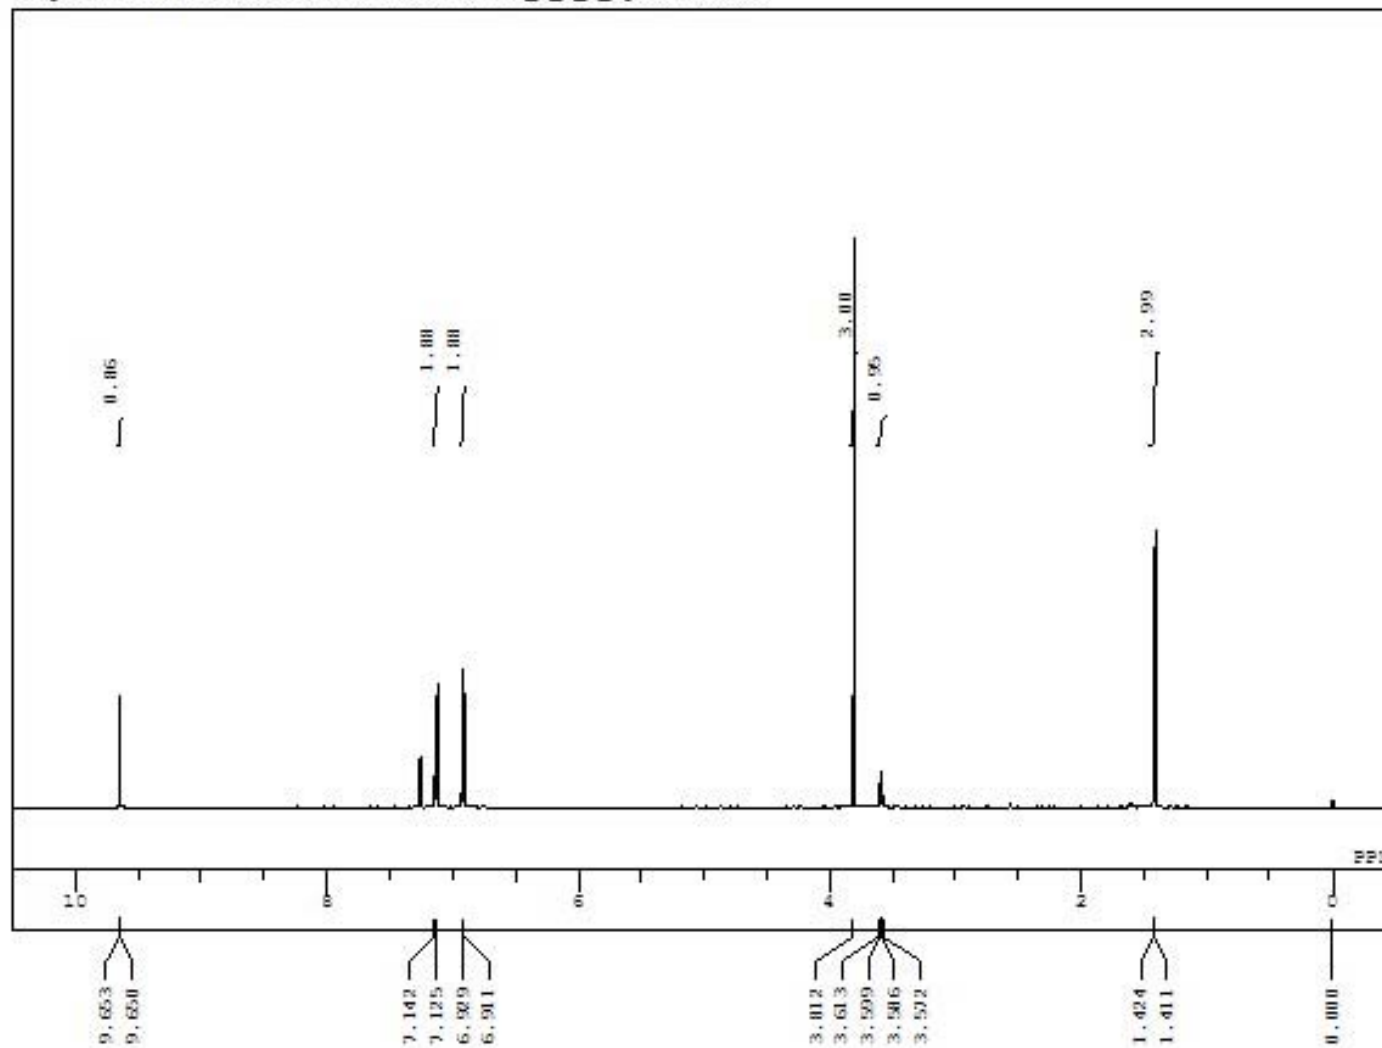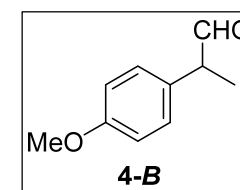

\\Fao-c08\orgchem-lab2\Team2\ (17) ZODi-H-2ZE23\W\Xj\ZAGzff\Alice\mk\_s\_4\_1\_13c\_spectrum.ala

DFILE mk\_s\_4\_1\_13c\_spectrum.ala  
COMNT p-MeO-branched aldehyde  
DATIM 2011-04-20 19:37:29  
CENUC 13C  
EXMOD single\_pulse\_dec  
OBFRQ 125.77 MHz  
OBSET 7.87 KHz  
OBFIN 4.21 Hz  
POINT 32768  
FREQU 31446.54 Hz  
SCANS 200  
AQTM 1.0420 sec  
PD 1.0000 sec  
PWL 4.47 usec  
IRNUC 1H  
CTEMP 18.6 c  
SLVNT CDCL3  
EXREF 77.00 ppm  
BF 0.12 Hz  
RGAIN 29

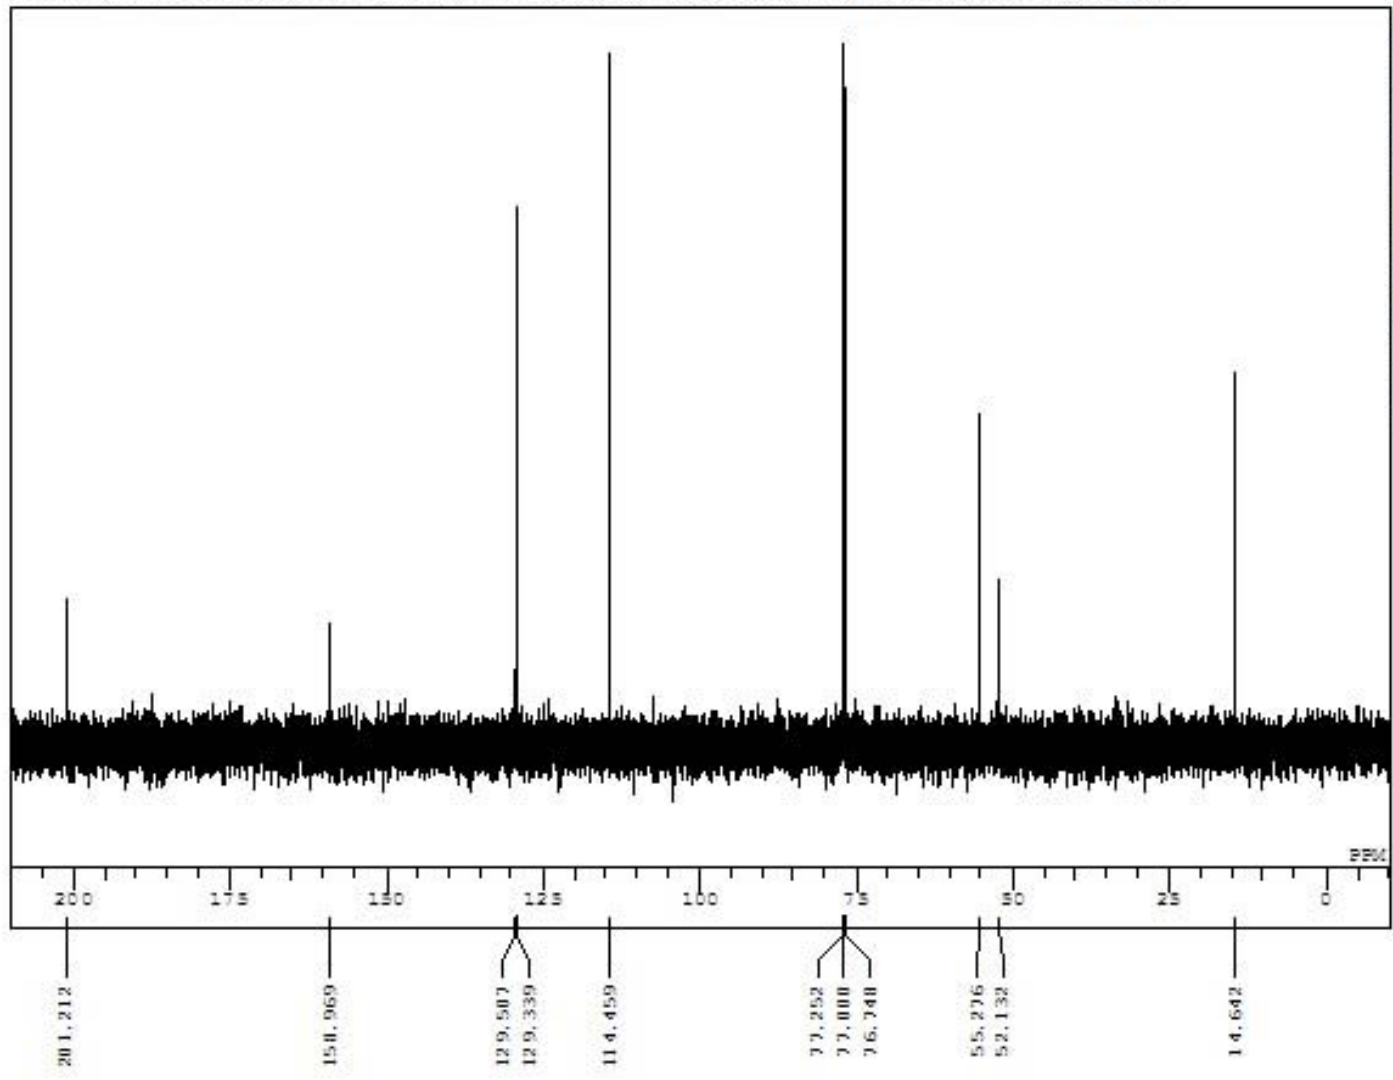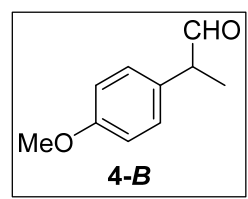

Z:\profiles.mandara-domain.V2\NMRff(f^)\mk\_a\_4\_2\_1d\_spectrum.als

DFILE mk\_a\_4\_2\_1d\_spectrum.als  
COMNT p\_MeO\_linear\_aldehyde  
DATIM 2011-04-21 12:52:18  
OBNUC 1H  
EXMOD single\_pulse.exp  
OBFRQ 500.16 MHz  
OBSET 2.41 KHz  
OBFIN 6.01 Hz  
POINT 16384  
FREQU 10010.01 Hz  
SCANS 16  
ACQTM 1.6368 sec  
PD 4.0000 sec  
PW1 7.00 usec  
IRNUC 1H  
CTEMP 16.4 c  
SLVMT CDCL3  
EXREF 0.00 ppm  
BF 0.12 Hz  
RGAIN 18

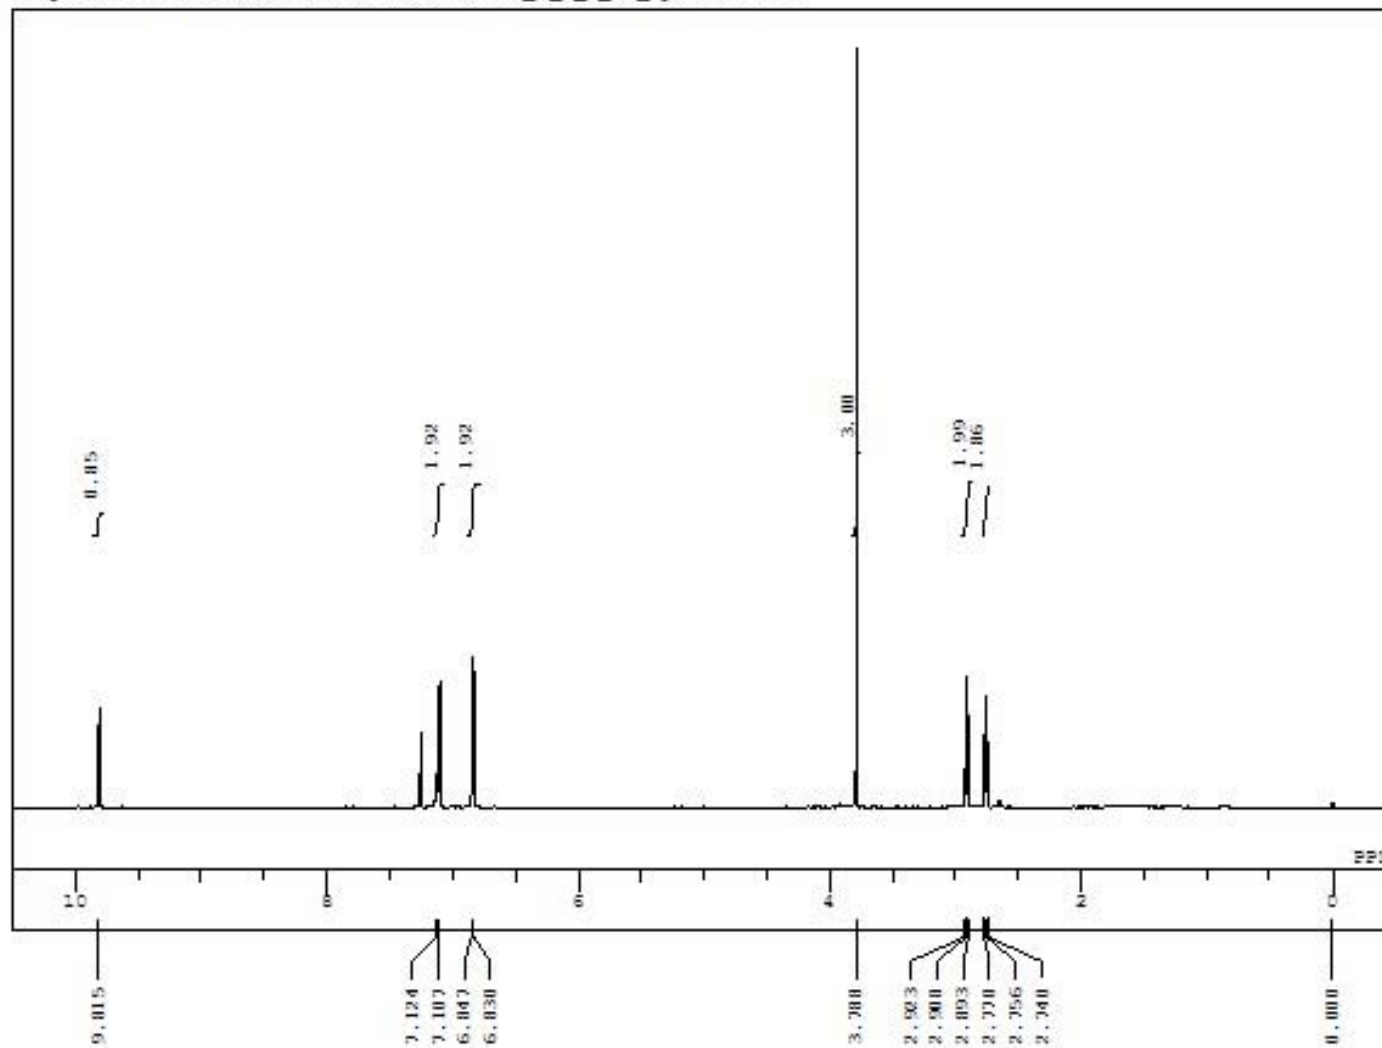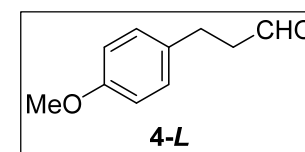

\\fso-c08\o-gchem-lab2\TeamG\17\ZODI-4-22E23\31\*xj\ZAGzff(f^)\Alice\mk\_a\_4\_2\_13c\_spectrum.ala

DFILE mk\_a\_4\_2\_13c\_spectrum.ala  
COMNT p-MeO-linearaldehyde  
DATIM 2011-04-20 13:55:18  
OBNUC 13C  
EXMOD single\_pulse\_dec  
OBFRQ 125.77 MHz  
OBSET 7.87 KHz  
OBFIN 4.21 Hz  
POINT 32768  
FREQU 31446.54 Hz  
SCANS 200  
ACQTM 1.0420 sec  
PD 1.0000 sec  
PWL 4.47 usec  
IRNUC 1H  
OTEMP 18.9 c  
SOLVT CDCL3  
EXREF 77.00 ppm  
BF 0.12 Hz  
RGAIN 28

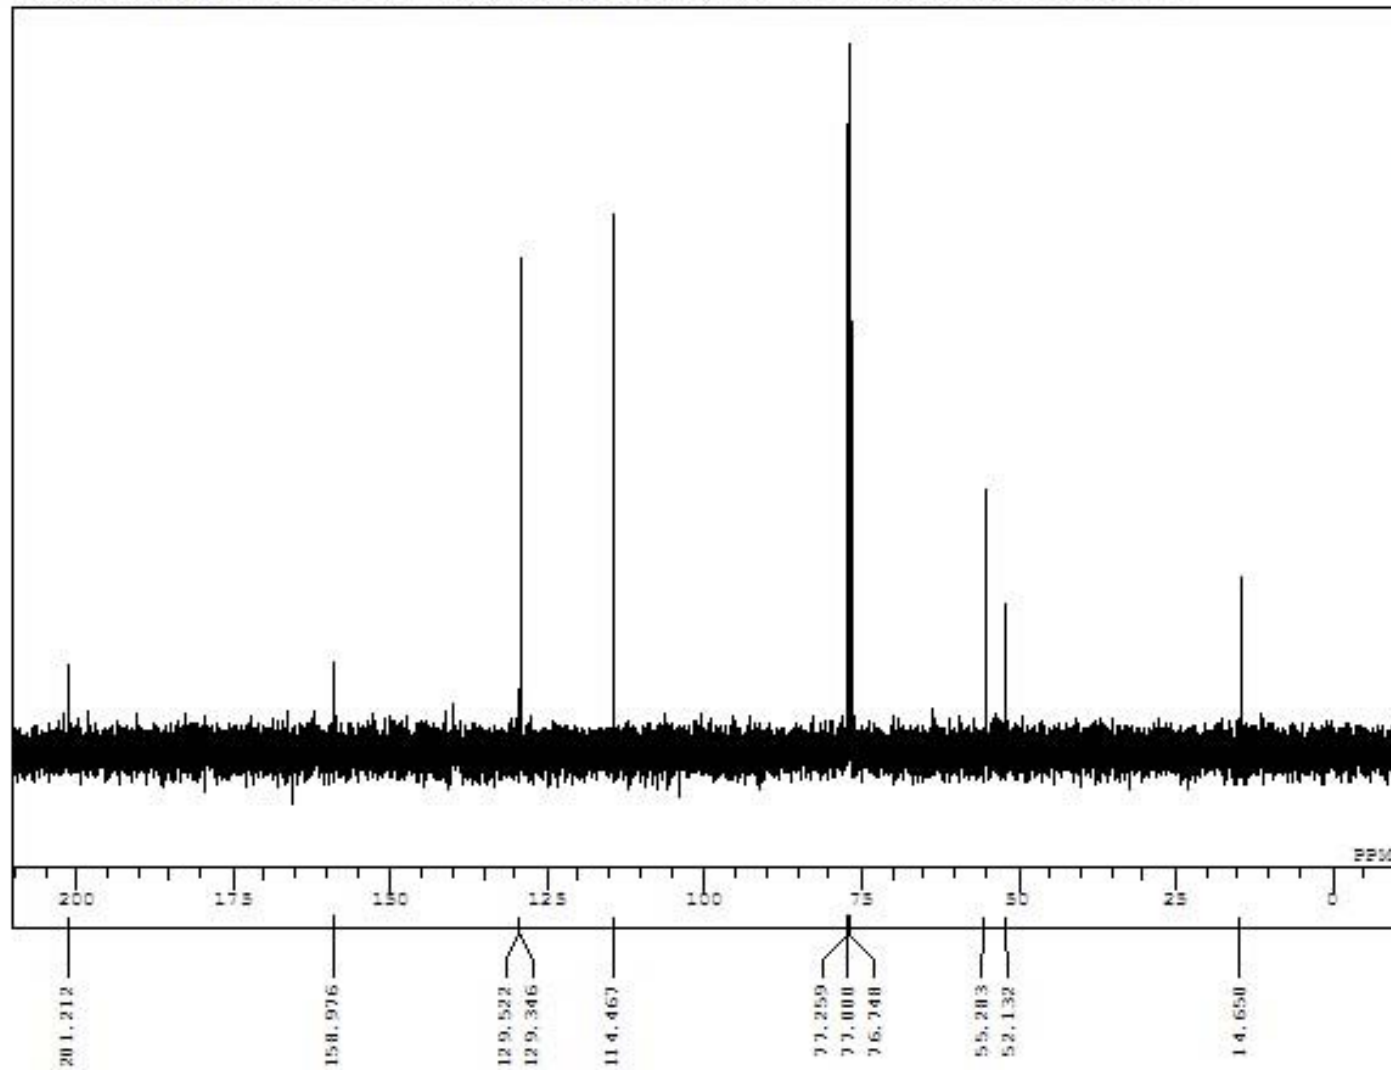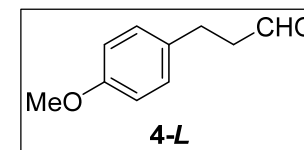

\\fso-c08\o-gchem-lab2\TeamG\17\ZODI-4-22E23\31\ZAG-f\Alice\mk\_a\_5\_1\_ld\_spectrum.als

DFILE mk\_a\_5\_1\_ld\_spectrum.als  
COMNT mk\_a\_5\_2  
DATIM 2011-04-21 13:40:44  
OBNUC 1H  
EXMOD single\_pulse.exp  
OBFRQ 500.16 MHz  
OBSET 2.41 KHz  
OBFIN 6.01 Hz  
POINT 16384  
FREQU 10010.01 Hz  
SCANS 16  
AQTM 1.6368 sec  
PD 4.0000 sec  
FW1 7.00 usec  
IRNUC 1H  
OTEMP 17.5 o  
SOLVT CDCL3  
EXREF 0.00 ppm  
BF 0.12 Hz  
RGAIN 17

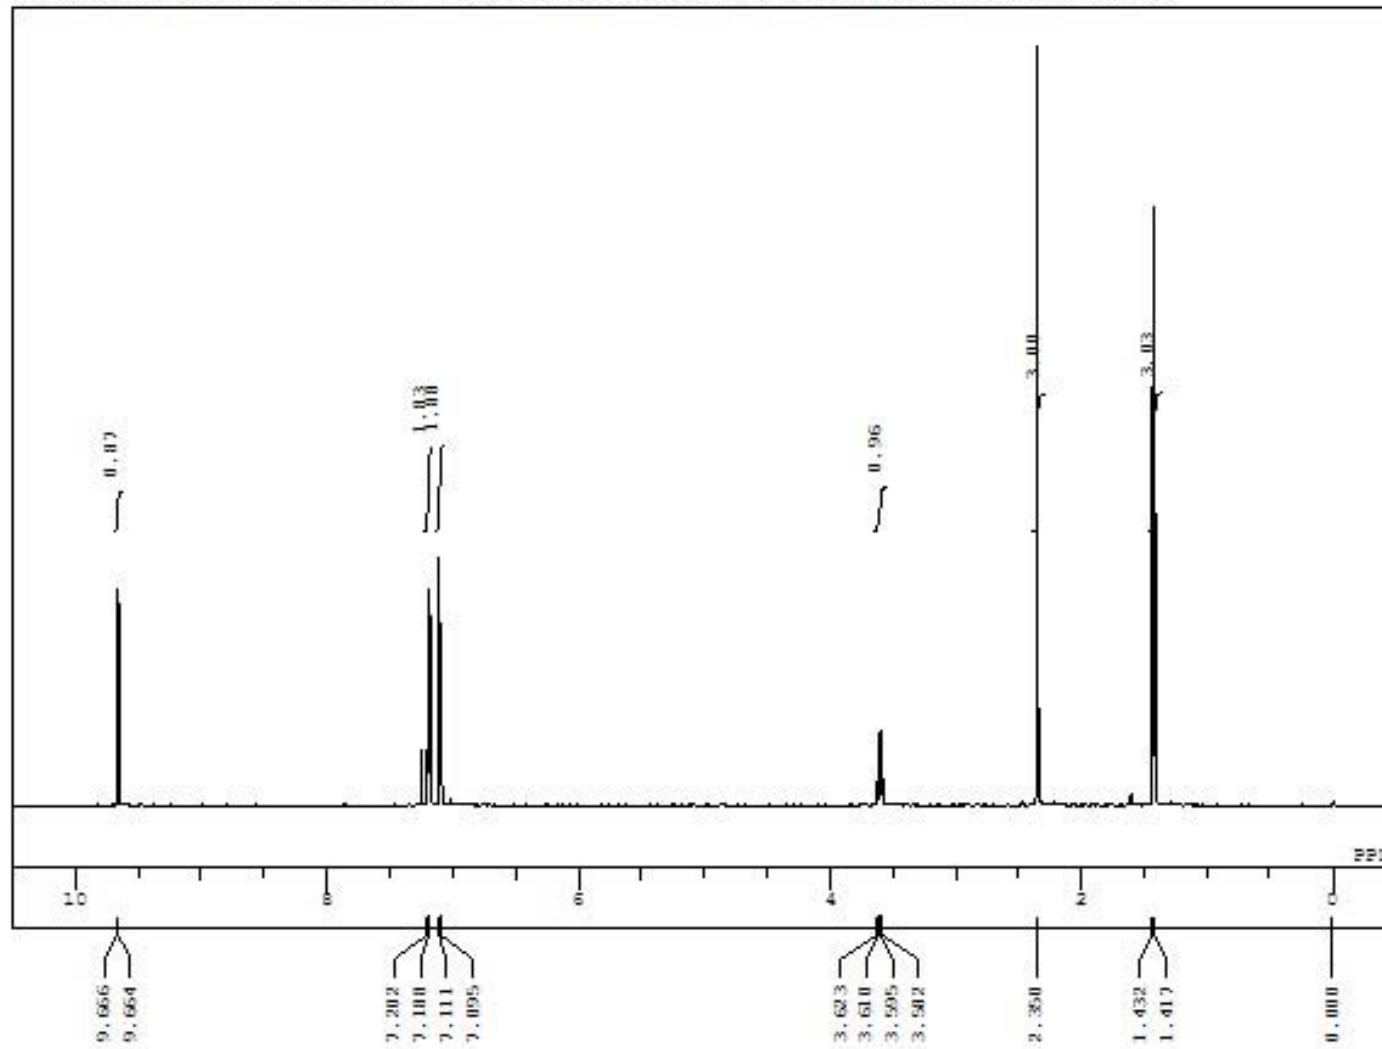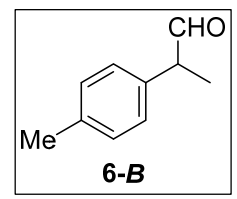

\\fso-c08\o-gchem-lab2\TeamG\17\ZODI-4-22E23\31\*xj\ZAGzff(f^)\Alice\mk\_e\_5\_1\_13c\_spectrum.ala

DFILE mk\_e\_5\_1\_13c\_spectrum.ala  
COMNT Single Pulse with Broadband  
DATIM 2011-08-09 13:52:00  
OBNUC 13C  
EXMDD single\_pulse\_dec  
OBFRQ 125.77 MHz  
OBSET 7.87 KHz  
OBFIM 4.21 Hz  
POINT 32768  
FREQU 31446.54 Hz  
SCANS 1500  
ACQTM 1.0420 sec  
PD 1.0000 sec  
PWL 4.47 usec  
IRNUC 1H  
OTEMP 23.7 c  
SLVMT CDCL3  
EXREF 77.00 ppm  
BF 0.12 Hz  
RGAIN 30

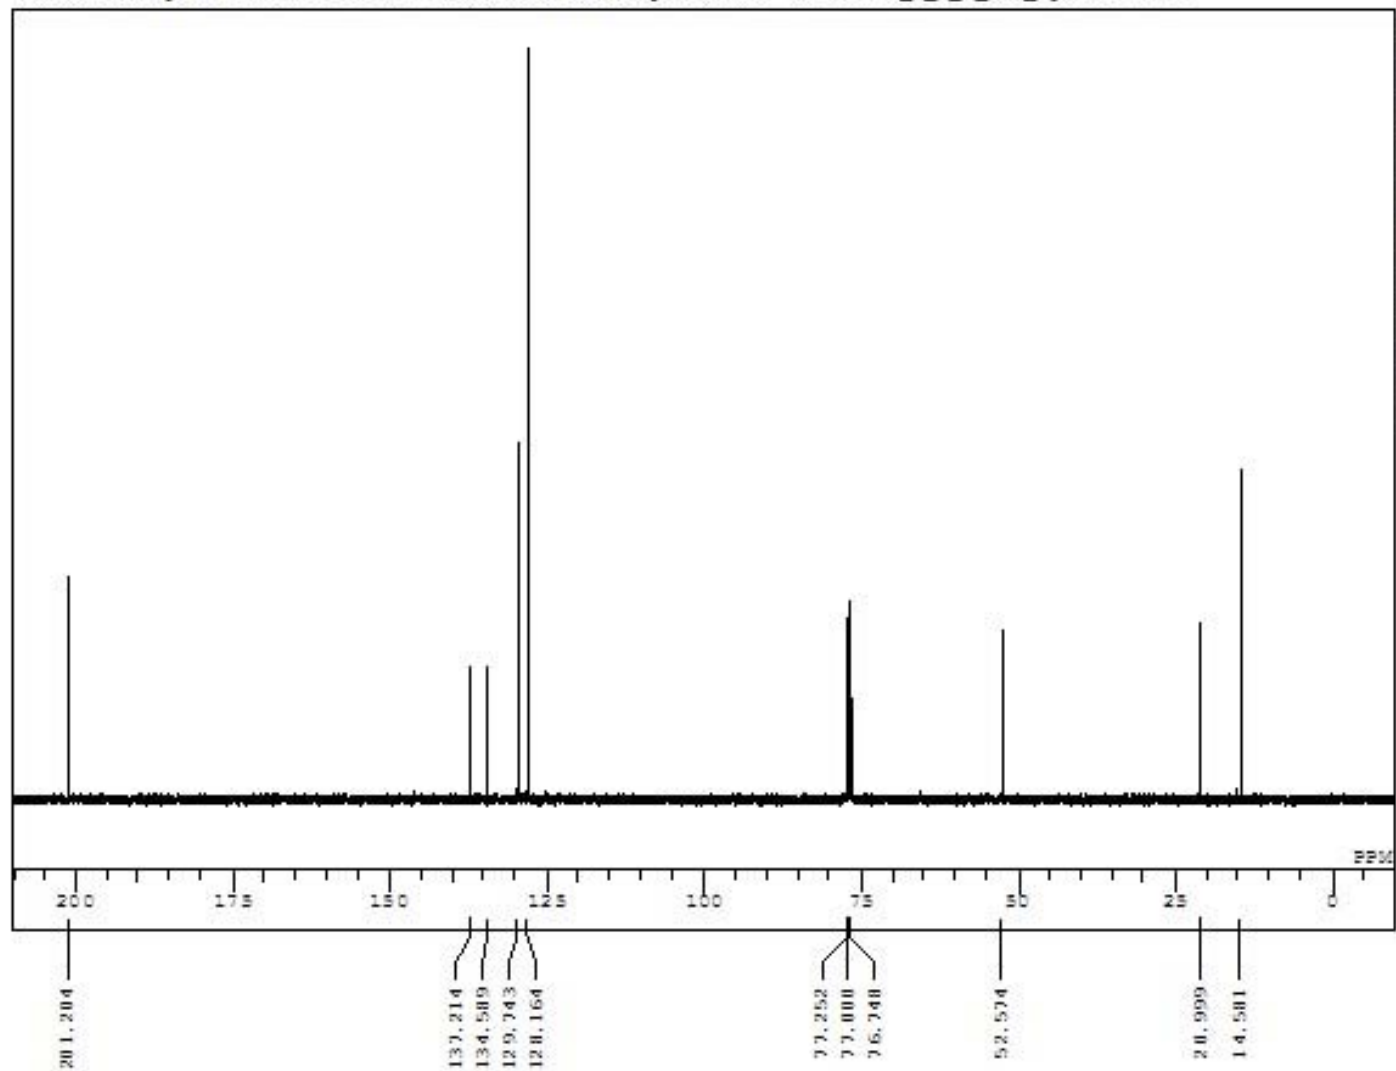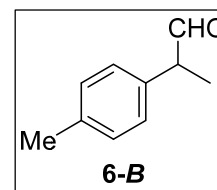

\\fao-c08\o-gchem-lab2\TeamG\17\ZODI-4-22E23\31\*xj\ZAGzff\Alice\mk\_a\_5\_2\_1d\_spectrum.als

DFILE mk\_a\_5\_2\_1d\_spectrum.als  
COMNT p-Me\_branched\_aldehyde  
DATIM 2011-04-21 13:19:20  
OBNUC 1H  
EXMDD single\_pulse.exp  
OBFRQ 500.16 MHz  
OBSET 2.41 KHz  
OBFIN 6.01 Hz  
POINT 16384  
FREQU 10010.01 Hz  
SCANS 16  
ACQTM 1.6368 sec  
PD 4.0000 sec  
PW1 7.00 usec  
IRNUC 1H  
OTEMP 17.1 c  
SLVNT CDCL3  
EXREF 0.00 ppm  
BF 0.12 Hz  
RGAIN 20

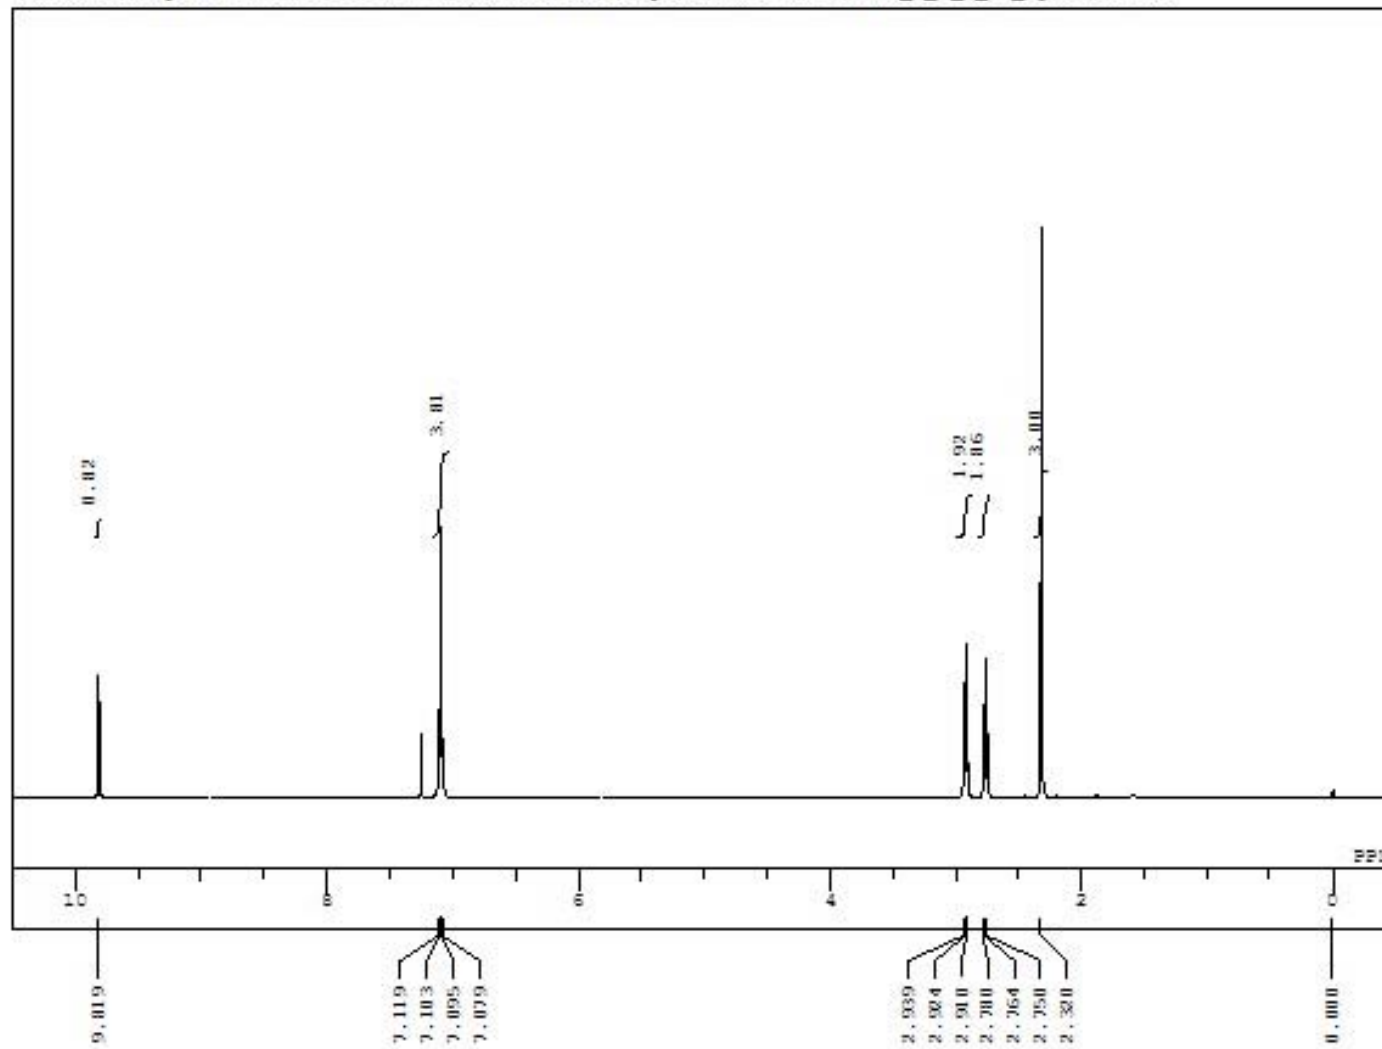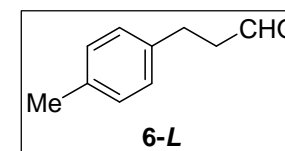



\\fso-c08\orgchem-lab2\TeamG\17\ZODI-H-22E23\01\*xj\ZAGzff(f^\Alice\mk\_a\_5\_2\_13c\_spectrum.ala

DFILE mk\_a\_5\_2\_13c\_spectrum.ala  
COMNT p\_Me\_branched\_aldehyde  
DATIM 2011-04-21 13:29:13  
OBNUC 13C  
EXMDD single\_pulse\_dec  
OBFRQ 125.77 MHz  
OBSET 7.87 KHz  
OBFIN 4.21 Hz  
POINT 32768  
FREQU 31446.54 Hz  
SCANS 200  
ACQTM 1.0420 sec  
PD 1.0000 sec  
PWL 4.47 usec  
IRNUC 1H  
OTEMP 18.6 c  
SOLVT CDCL3  
EXREF 77.00 ppm  
BF 0.12 Hz  
RGAIN 28

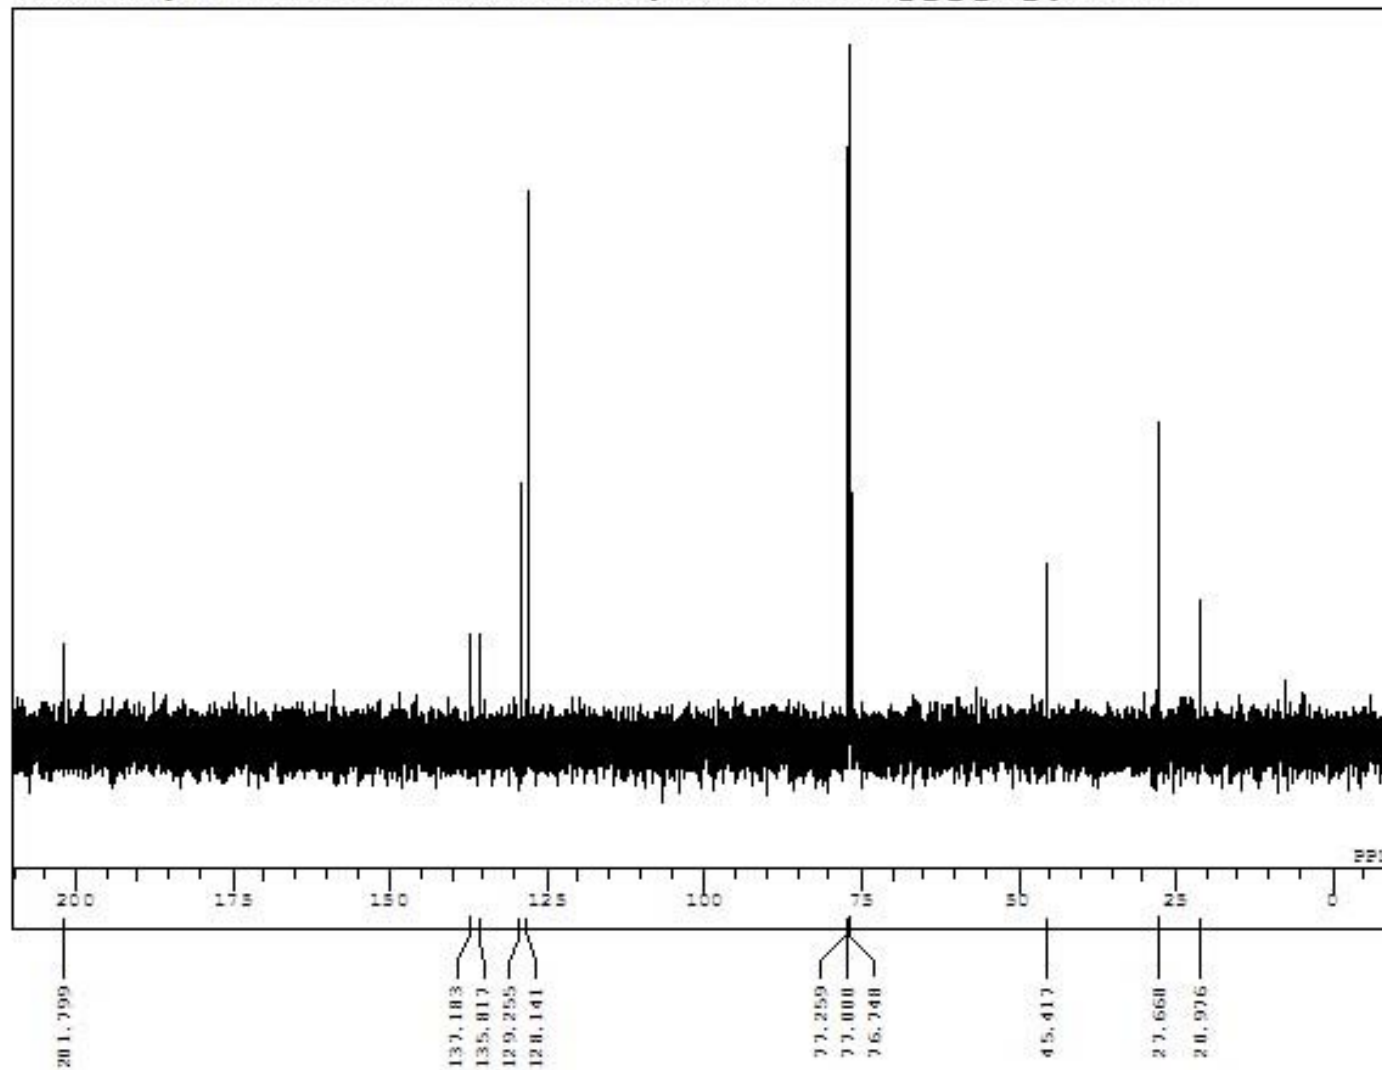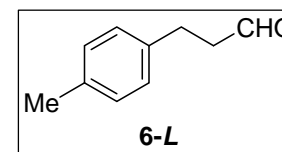

\\fso-c08\orgchem-lab2\TeamG\17\ZODI-H-22E23\31\*xj\ZAGzff\Alice\mk\_a\_6\_1\_1d\_spectrum.als

DFILE mk\_a\_6\_1\_1d\_spectrum.als  
COMNT Single Pulse Experiment  
DATIM 2011-05-25 12:24:08  
OBNUC 1H  
EXMDD single\_pulse.exp  
OBFRQ 500.16 MHz  
OBSET 2.41 KHz  
OBFIN 6.01 Hz  
POINT 16384  
FREQU 10010.01 Hz  
SCANS 16  
ACQTM 1.6368 sec  
PD 4.0000 sec  
FW1 7.00 usec  
IRNUC 1H  
OTEMP 18.7 c  
SLVMT CDCL3  
EXREF 0.00 ppm  
BF 0.12 Hz  
RGAIN 18

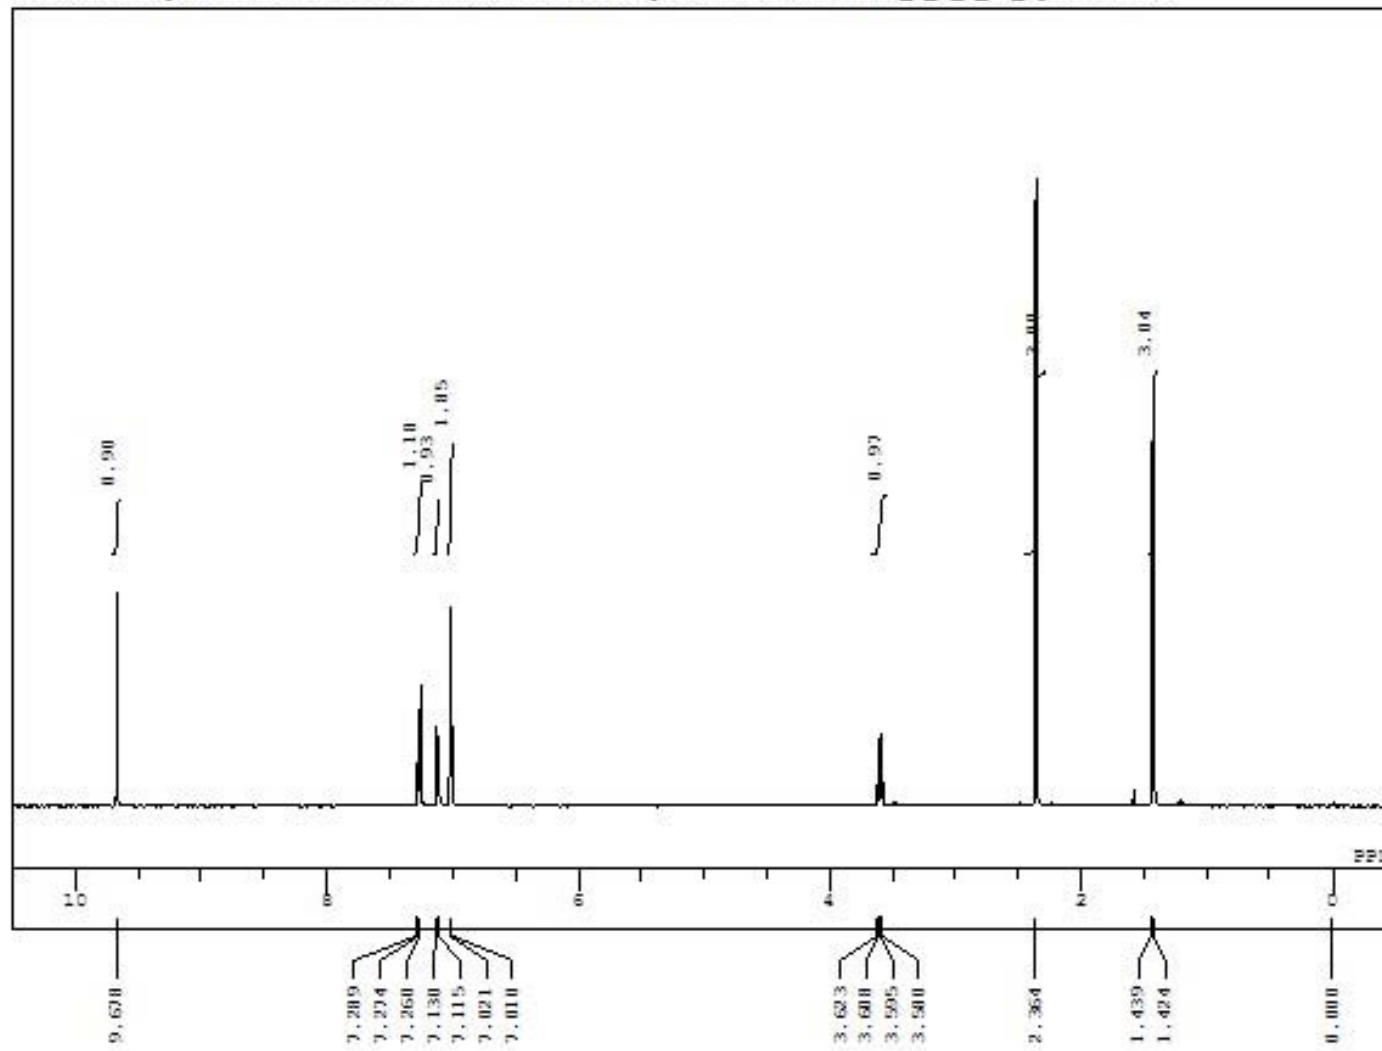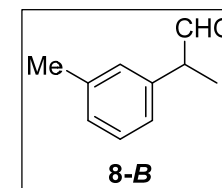

\\Fao-c08\orgchem-lab2\TeamG\ (17) ZODI-4-22E23"Xj\ EAGzfs\ f^\Alice\mk\_s\_6\_1\_1d\_13c\_spectrum.als

```

DFILE mk_s_6_1_1d_13c_spectrum.als
COMMT Single Pulse with Broadband
DATIM 2011-05-25 13:35:25
CENUC 13C
EXMOD single_pulse_dec
OBFRQ 125.77 MHz
OBSET 7.87 KHz
OBFIN 4.21 Hz
POINT 32768
FREQU 31446.54 Hz
SCANS 2048
AQTM 1.0420 sec
PD 1.0000 sec
PWL 4.47 usec
IRNUC 1H
CTEMP 20.8 c
SLVNT CDCL3
EKREF 77.00 ppm
BF 0.12 Hz
RGAIN 28
    
```

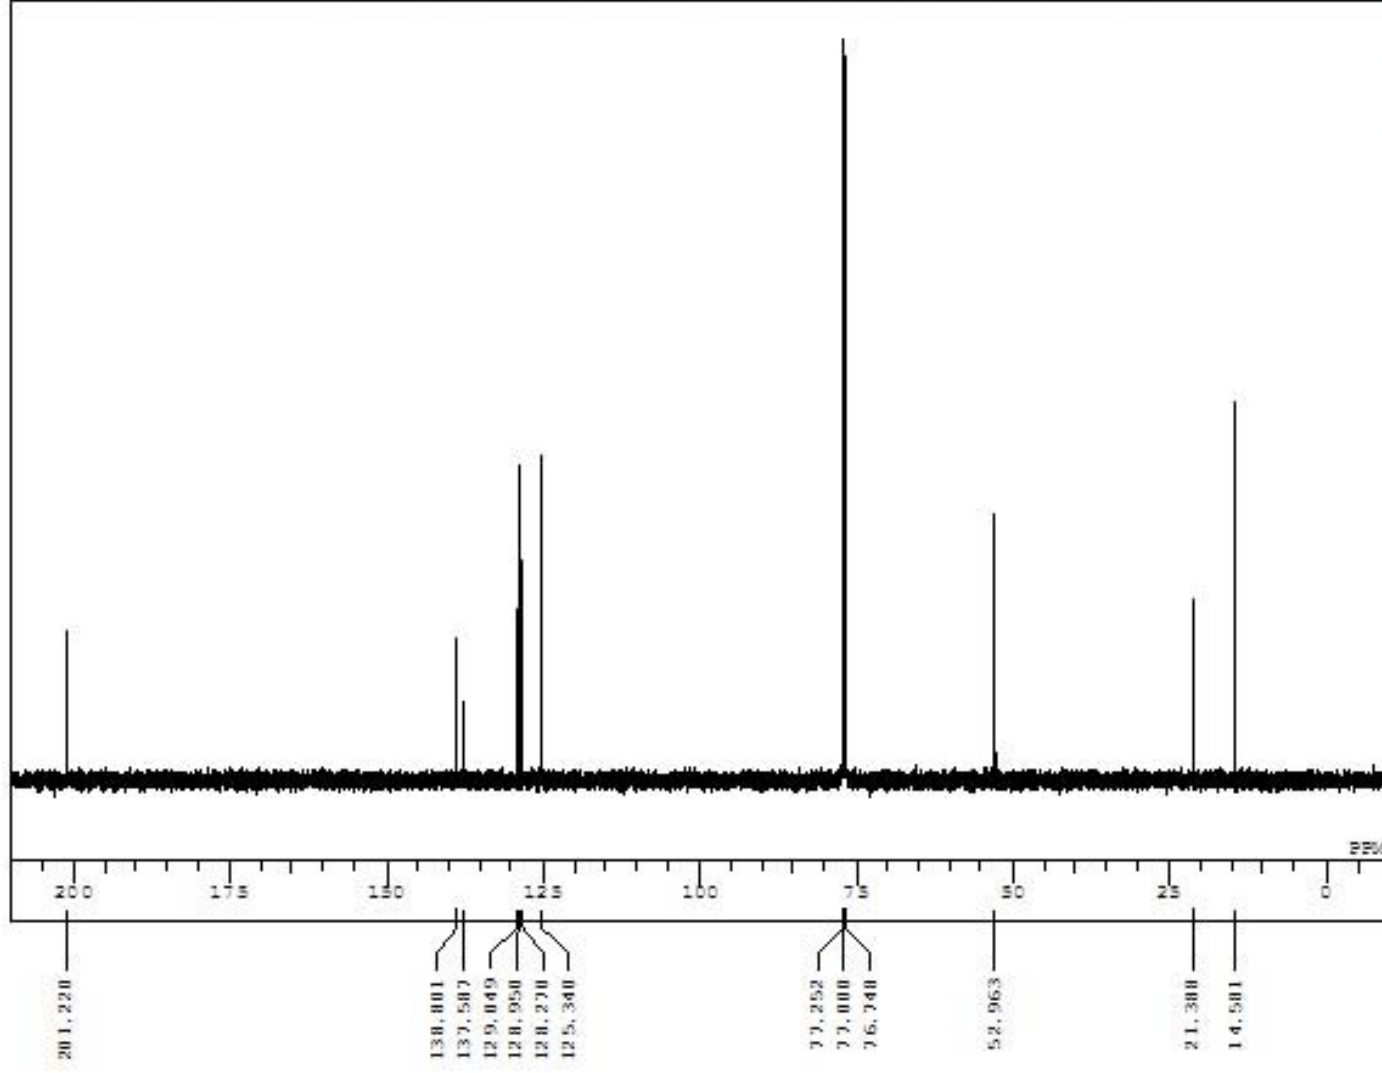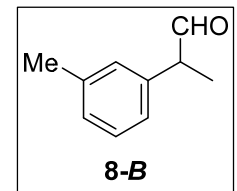

\\fao-c08\orgchem-lab2\TeamG\17\ZODI-H-22E23\31\*xj\ZAEff\Alicia\mk\_a\_6\_2\_1d\_spectrum.als

DFILE mk\_a\_6\_2\_1d\_spectrum.als  
COMNT Single Pulse Experiment  
DATIM 2011-05-25 14:48:09  
OBNUC 1H  
EXMDD single\_pulse.exp  
OBFRQ 500.16 MHz  
OBSET 2.41 KHz  
OBFIN 6.01 Hz  
POINT 16384  
FREQU 10010.01 Hz  
SCANS 16  
ACQTM 1.6368 sec  
PD 4.0000 sec  
PW1 7.00 usec  
IRNUC 1H  
OTEMP 19.0 c  
SOLVT CDCL3  
EXREF 0.00 ppm  
BF 0.12 Hz  
RGAIN 17

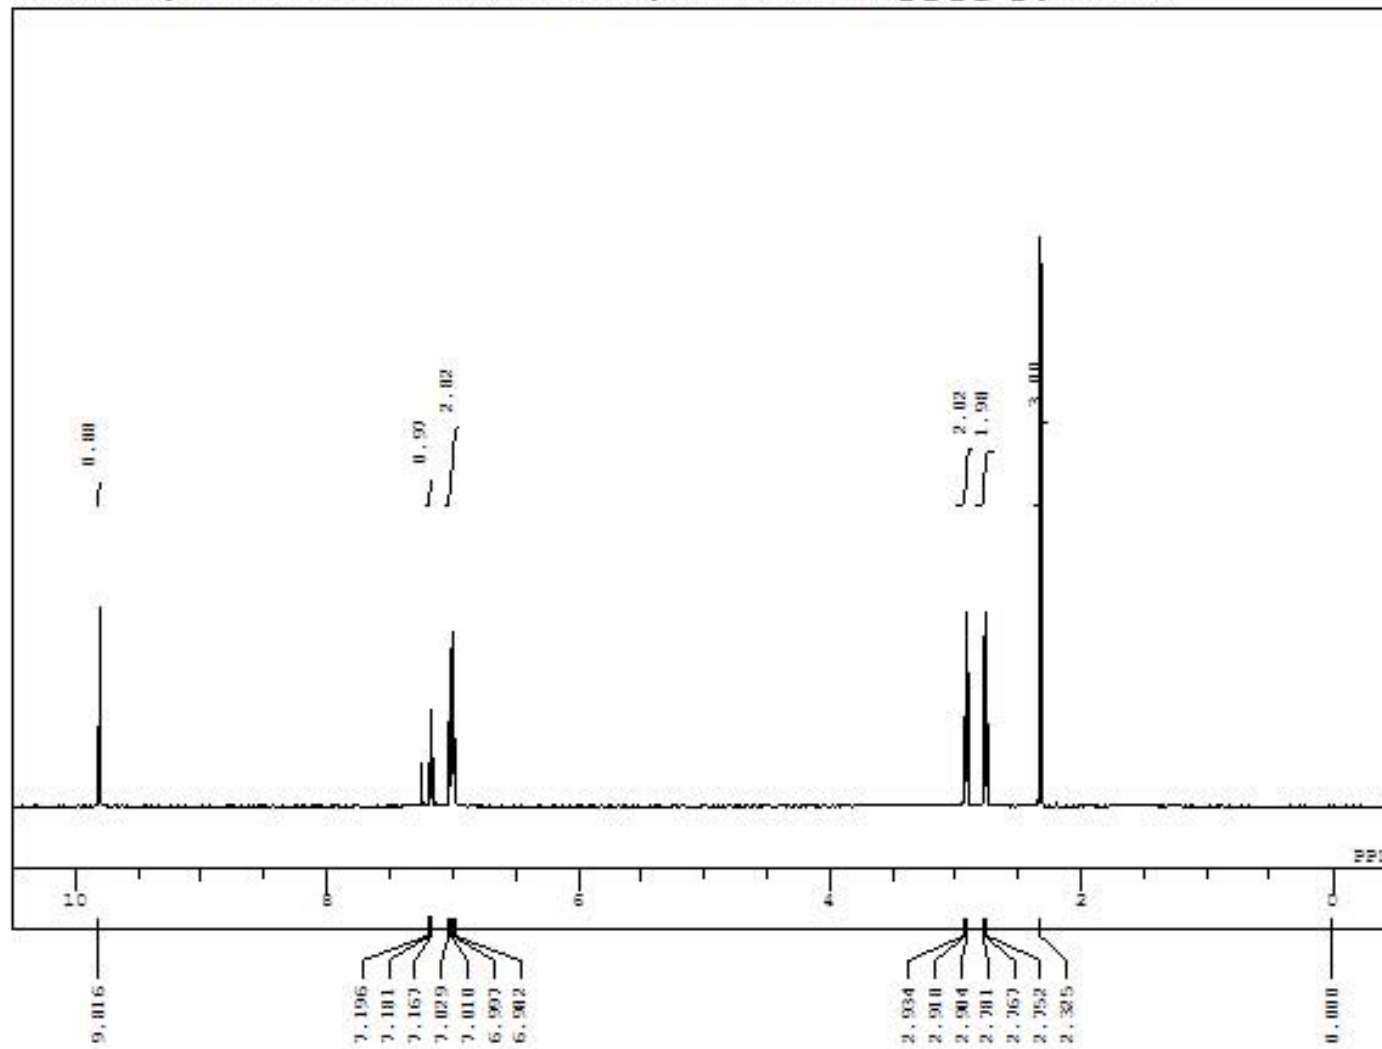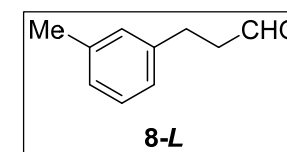

\\Fao-008\orgchem-lab2\Team2\ (17) ZODI-4-22E23\W\*xj\ZADzff\Alice\mk\_s\_6\_2\_13c\_spectrum.als

DFILE mk\_s\_6\_2\_13c\_spectrum.als  
COMMT Single Pulse with Broadband  
DATIM 2011-05-25 15:59:16  
CENUC 13C  
EXMOD single\_pulse\_dec  
OBFRQ 125.77 MHz  
OBSET 7.87 KHz  
OBPIN 4.21 Hz  
POINT 32768  
FREQU 31446.54 Hz  
SCANS 2048  
AQTM 1.0420 sec  
PD 1.0000 sec  
PWL 4.47 usec  
IRNUC 1H  
CTEMP 20.5 c  
SLVNT CDCL3  
EXREF 77.00 ppm  
BF 0.12 Hz  
RGAIN 30

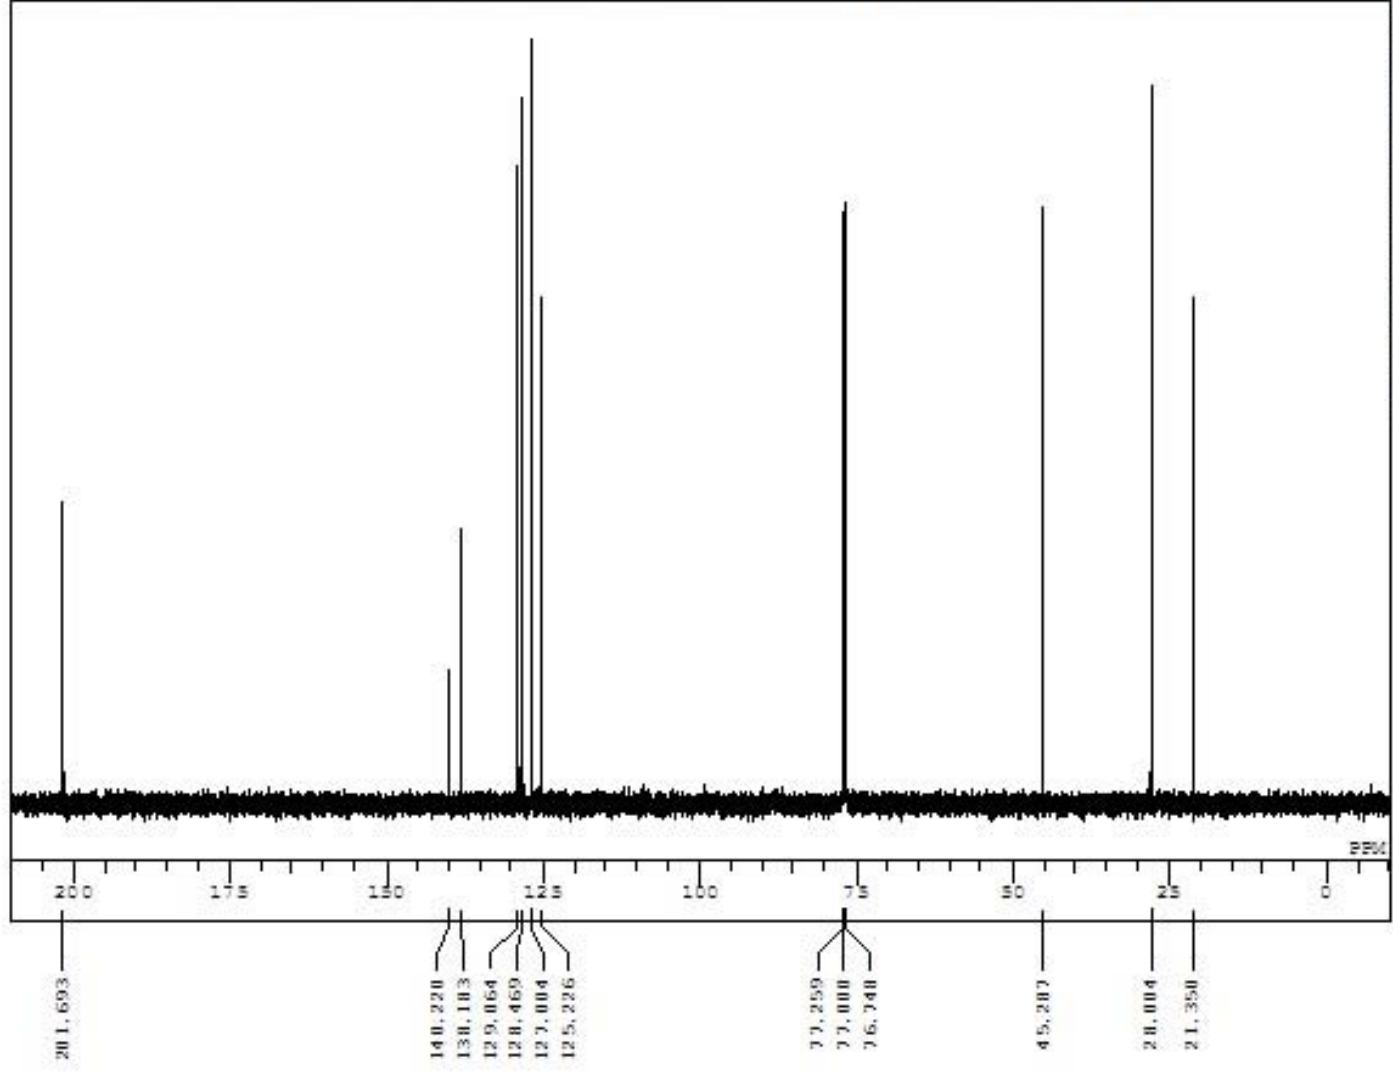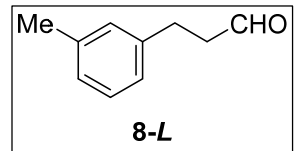

\\fao-c08\orgchem-lab2\TeamG\17\ZODI-4-22E23\31\*xj\ZAGzff\Alice\mk\_a\_3\_1\_1d\_spectrum.als

```

DFILE mk_a_3_1_1d_spectrum.als
COMNT p_F_branched_aldehyde
DATIM 2011-04-22 13:02:22
OBNUC 1H
EXMDD single_pulse.exp
OBFRQ 500.16 MHz
OBSET 2.41 kHz
OBFIN 6.01 Hz
POINT 16384
FREQU 10010.01 Hz
SCANS 16
AQTM 1.6368 sec
PD 4.0000 sec
FW 7.00 usec
IRNUC
OTEMP 17.8 c
SLVNT CDCL3
EXREF 0.00 ppm
BF 0.12 Hz
RGAIN 18
    
```

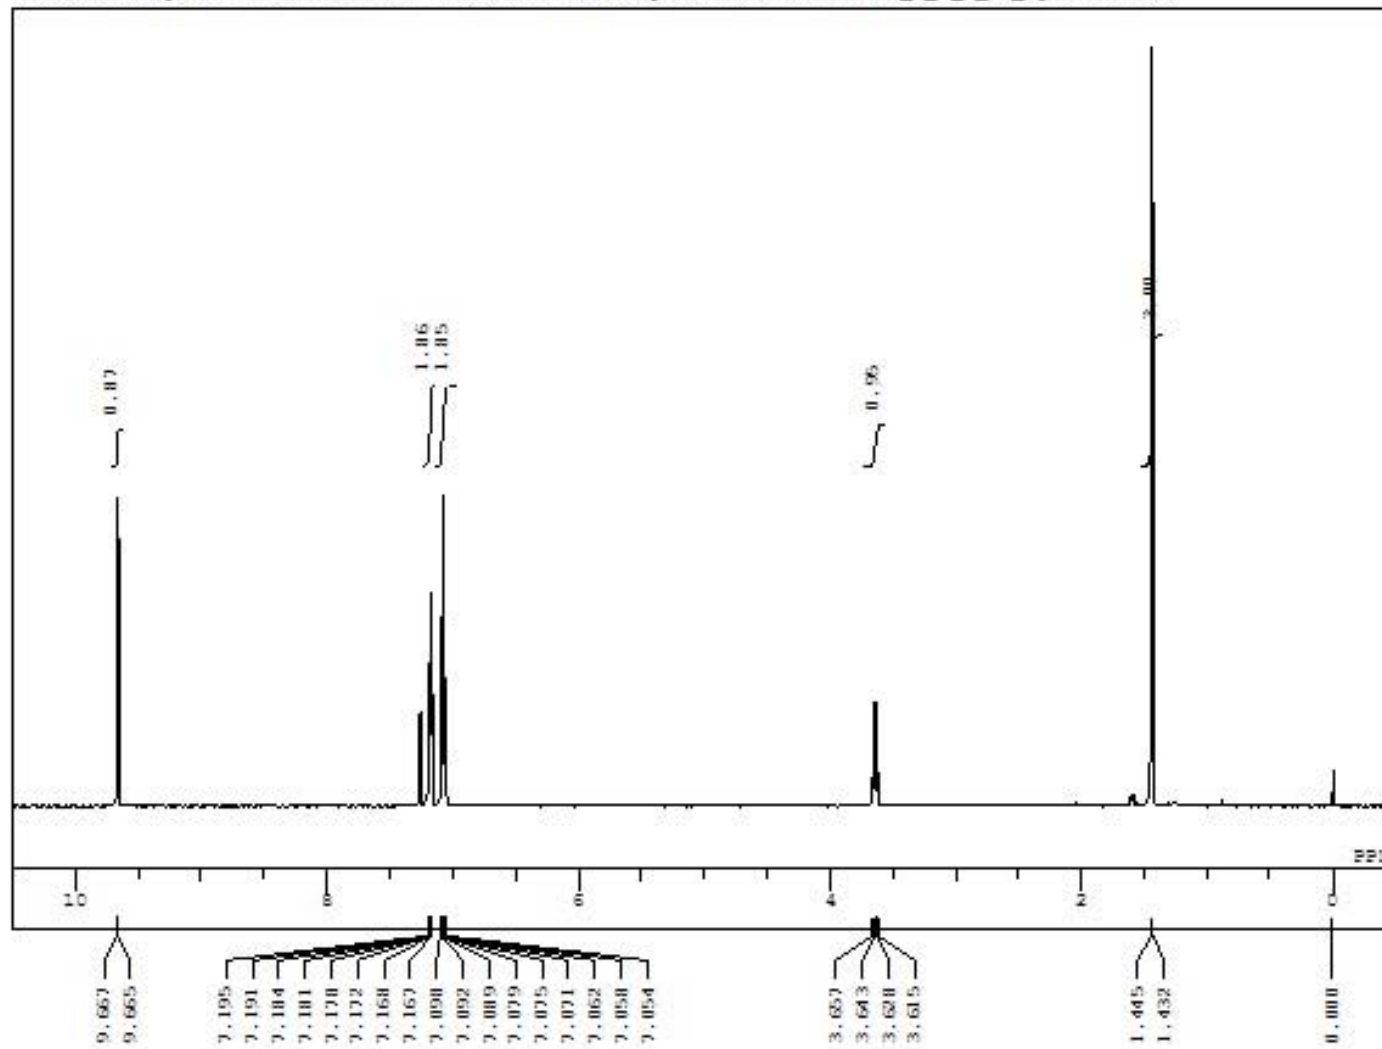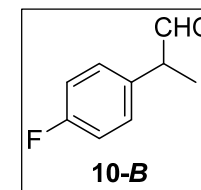

Z:\profiles.mandara-domain.V2\NMR\ff\mk\_a\_3\_1\_2\_13c\_spectrum.1

DFILE mk\_a\_3\_1\_2\_13c\_spectrum.1  
COMNT Single Pulse with Broadband  
DATIM 2012-03-27 16:45:38  
OBNUC 13C  
EXMDD single\_pulse\_dec  
OBFRQ 125.77 MHz  
OBSET 7.87 kHz  
OBFIN 4.21 Hz  
POINT 32768  
FREQU 31446.54 Hz  
SCANS 4000  
ACQTM 1.0420 sec  
PD 1.0000 sec  
PWL 4.47 usec  
IRNUC 1H  
OTEMP 22.3 c  
SLVMT CDCL3  
EXREF 77.00 ppm  
BF 0.12 Hz  
RGAIN 30

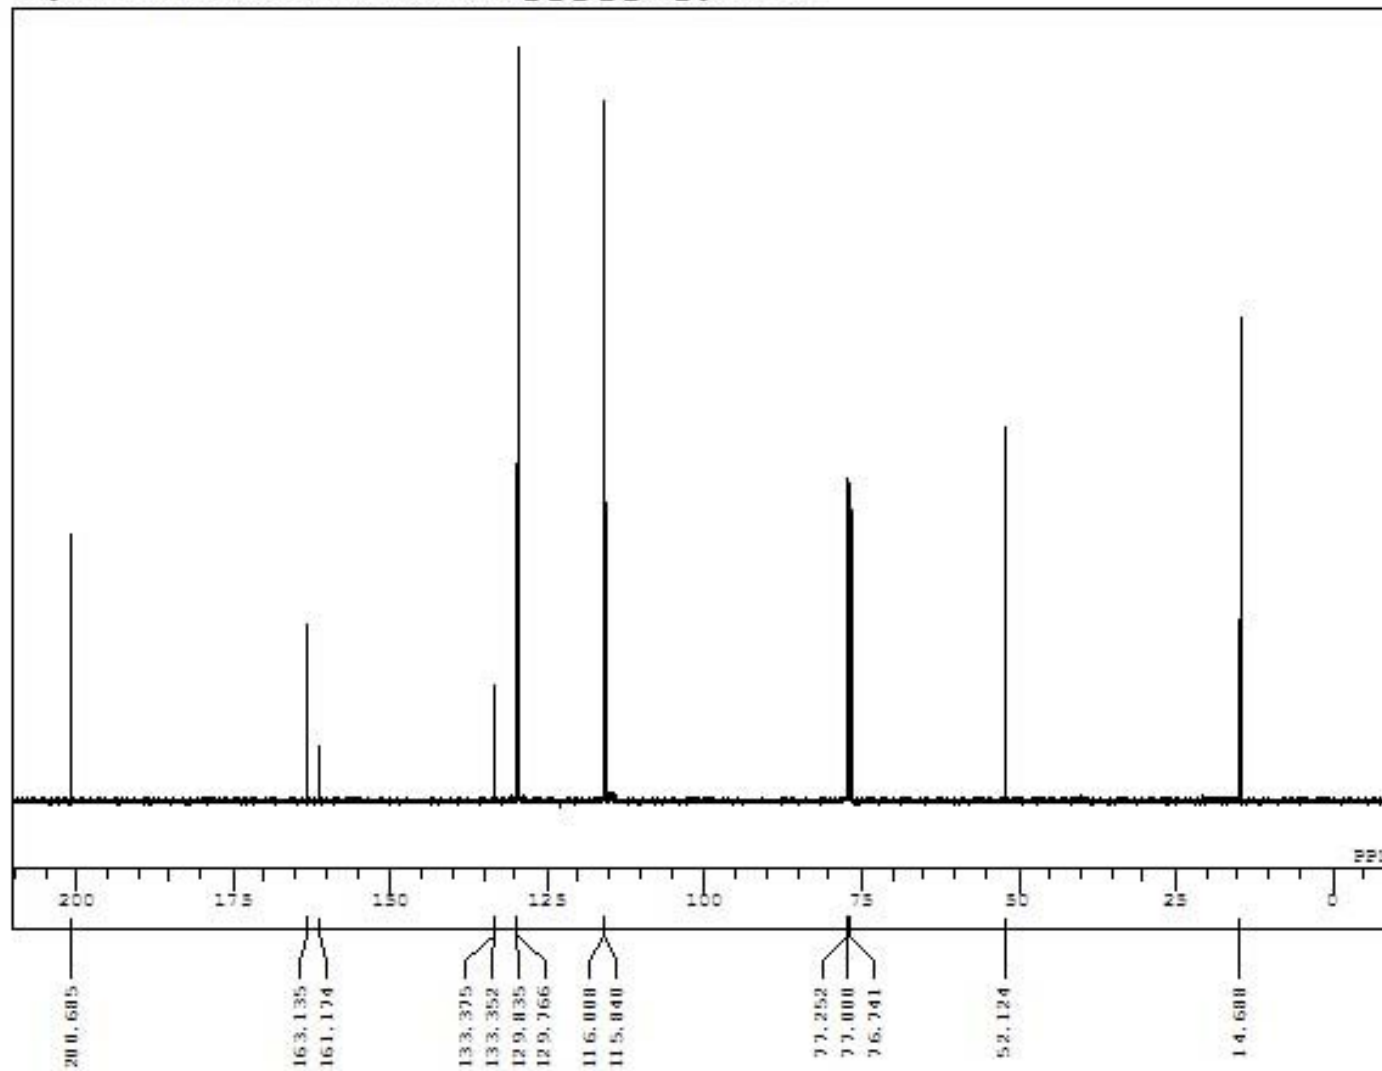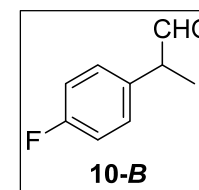

\\fao-c08\orgchem-lab2\TeamG\17\ZODI-4-22E23\31\*xj\ZAGzff\Alicia\mk\_a\_3\_2\_1d\_spectrum.als

DFILE mk\_a\_3\_2\_1d\_spectrum.als  
COMNT p\_F\_linear\_aldehyde  
DATIM 2011-04-22 12:39:22  
OBNUC 1H  
EXMDD single\_pulse.exp  
OBFRQ 500.16 MHz  
OBSET 2.41 kHz  
OBFIN 6.01 Hz  
POINT 16384  
FREQU 10010.01 Hz  
SCANS 16  
ACQTM 1.6368 sec  
PD 4.0000 sec  
PW1 7.00 usec  
IRNUC 1H  
OTEMP 17.3 c  
SLVNT CDCL3  
EXREF 0.00 ppm  
BF 0.12 Hz  
RGAIN 18

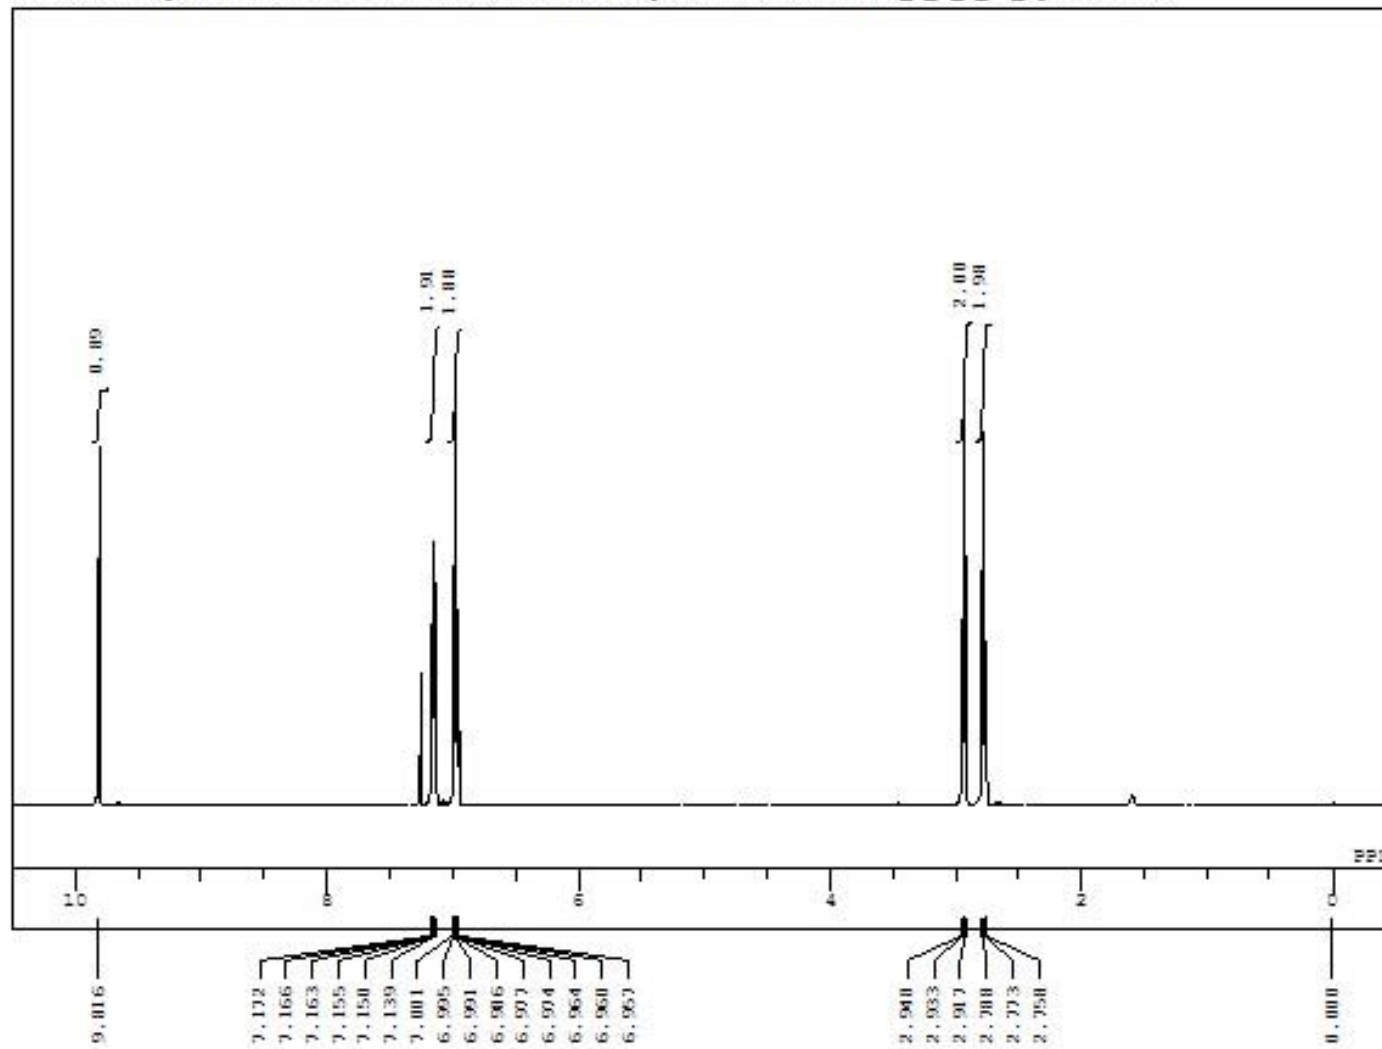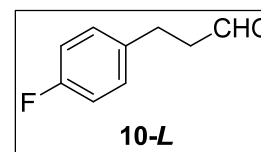



Z:\profiles.mandara-domain.V2\NMRff\ff\mk\_a\_3\_2\_4\_13c\_spectrum.1

DFILE mk\_a\_3\_2\_4\_13c\_spectrum.1  
COMNT Single Pulse with Broadband  
DATIM 2012-03-27 17:35:22  
OBNUC 13C  
EXMOD single\_pulse\_dec  
OBFRQ 125.77 MHz  
OBSET 7.87 KHz  
OBFIN 4.21 Hz  
POINT 32768  
FREQU 31446.54 Hz  
SCANS 1000  
ACQTM 1.0420 sec  
PD 1.0000 sec  
PWL 4.47 usec  
IRNUC 1H  
OTEMP 22.0 c  
SOLVENT CDCL3  
EXREF 77.00 ppm  
BF 0.12 Hz  
RGAIN 30

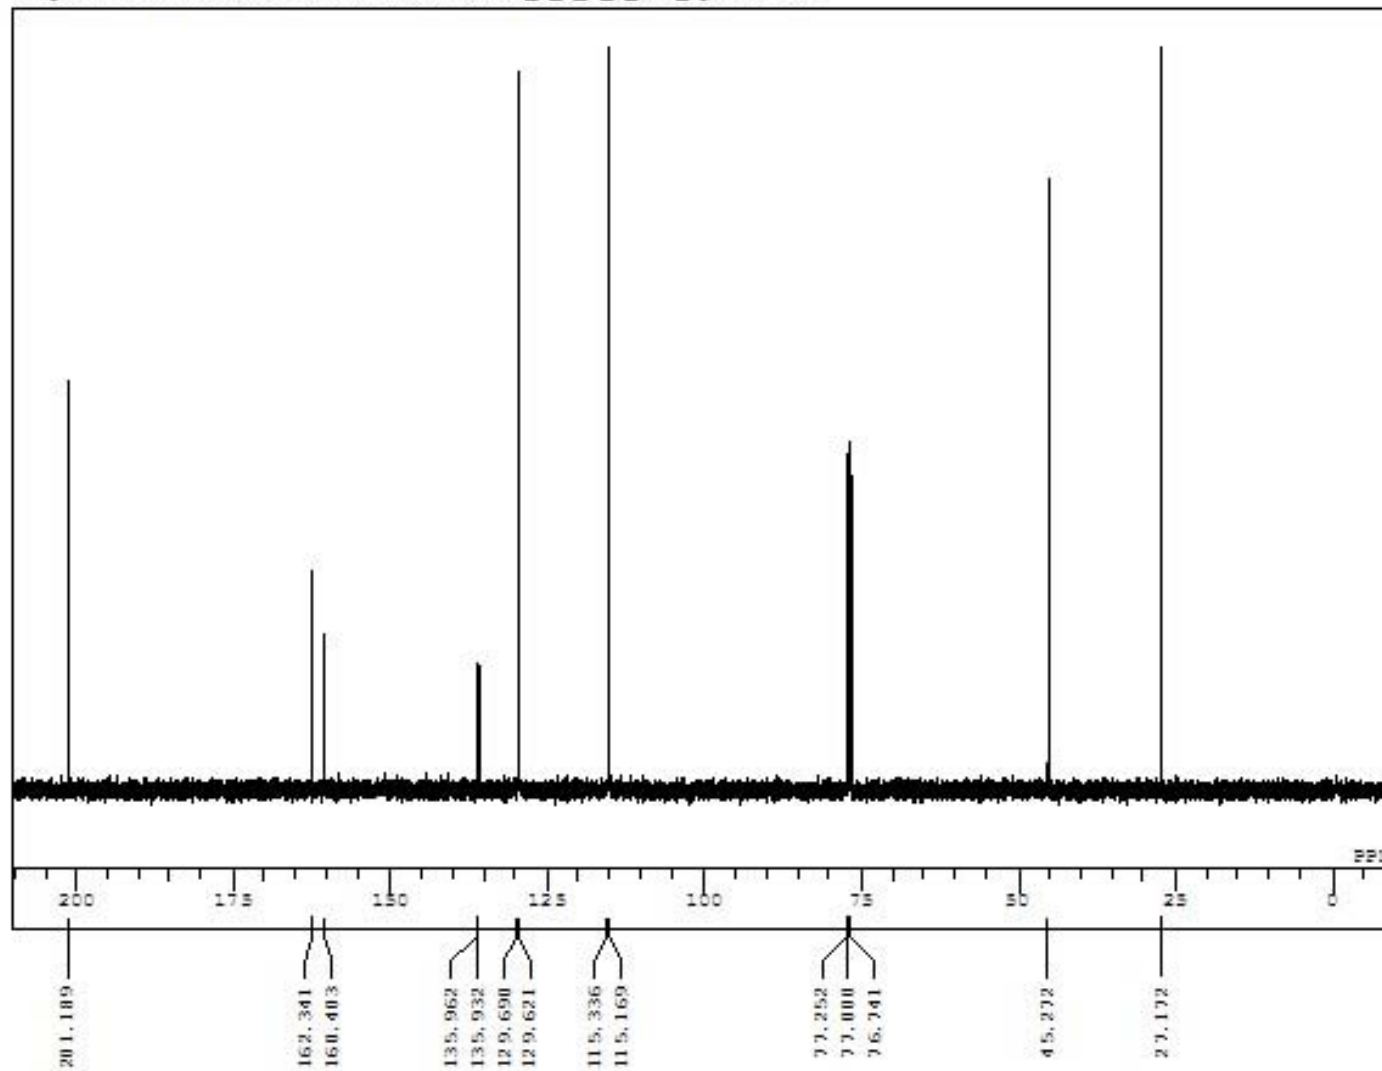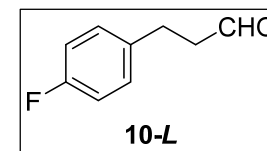

Z:\profiles.mandara-domain.V2\NMR\ff\mk\_a\_2\_1\_1d\_spectrum.als

DFILE mk\_a\_2\_1\_1d\_spectrum.als  
COMNT Single Pulse Experiment  
DATIM 2011-05-26 21:56:25  
OBNUC 1H  
EXMDD single\_pulse.exp  
OBFRQ 500.16 MHz  
OBSET 2.41 KHz  
OBFIN 6.01 Hz  
POINT 16384  
FREQU 10010.01 Hz  
SCANS 16  
ACQTM 1.6368 sec  
PD 4.0000 sec  
FW1 7.00 usec  
IRNUC  
OTEMP 19.2 c  
SLVMT CDCL3  
EXREF 0.00 ppm  
BF 0.12 Hz  
RGAIN 19

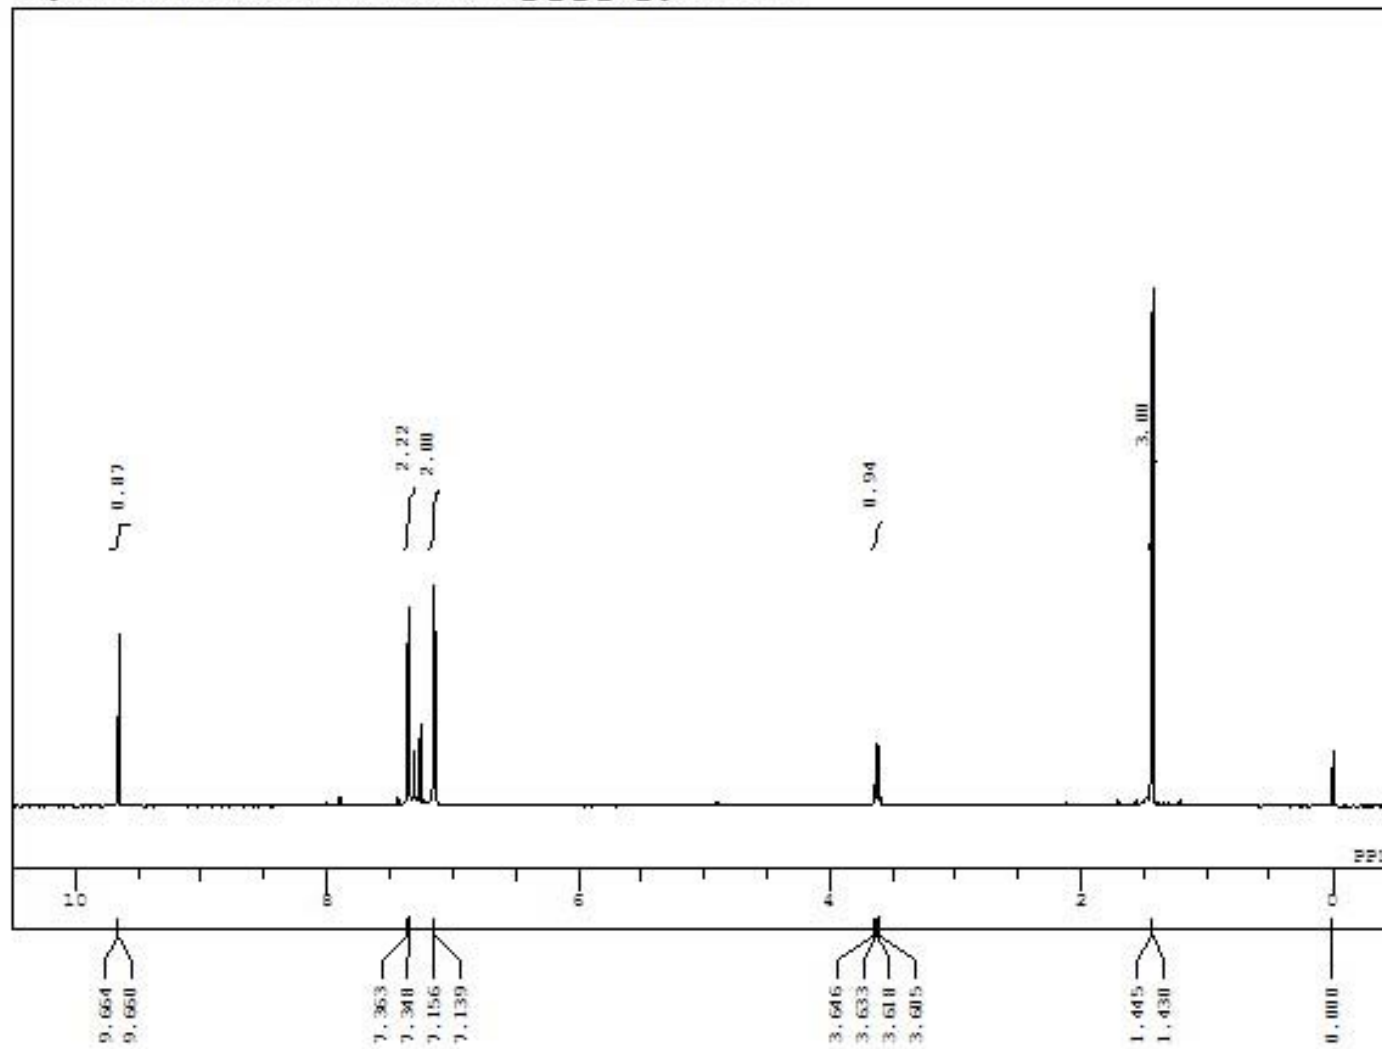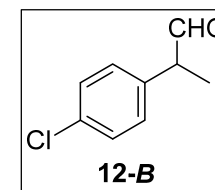

\\Fao-c08\orgchem-lab2\TeamG\ (17) 2001-4-22E23"Xj\ EAG-fs[f^\1Hx13CNGRrIRs\SeHRMS\aldehyde\_B\5\_p-Cl\mk\_e\_2\_1\_2\_13c\_spectrum.ala  
 DFILE mk\_e\_2\_1\_2\_13c\_spectrum.ala  
 PROCIT Single Pulse with Broadband  
 2011-07-21 09:06:48

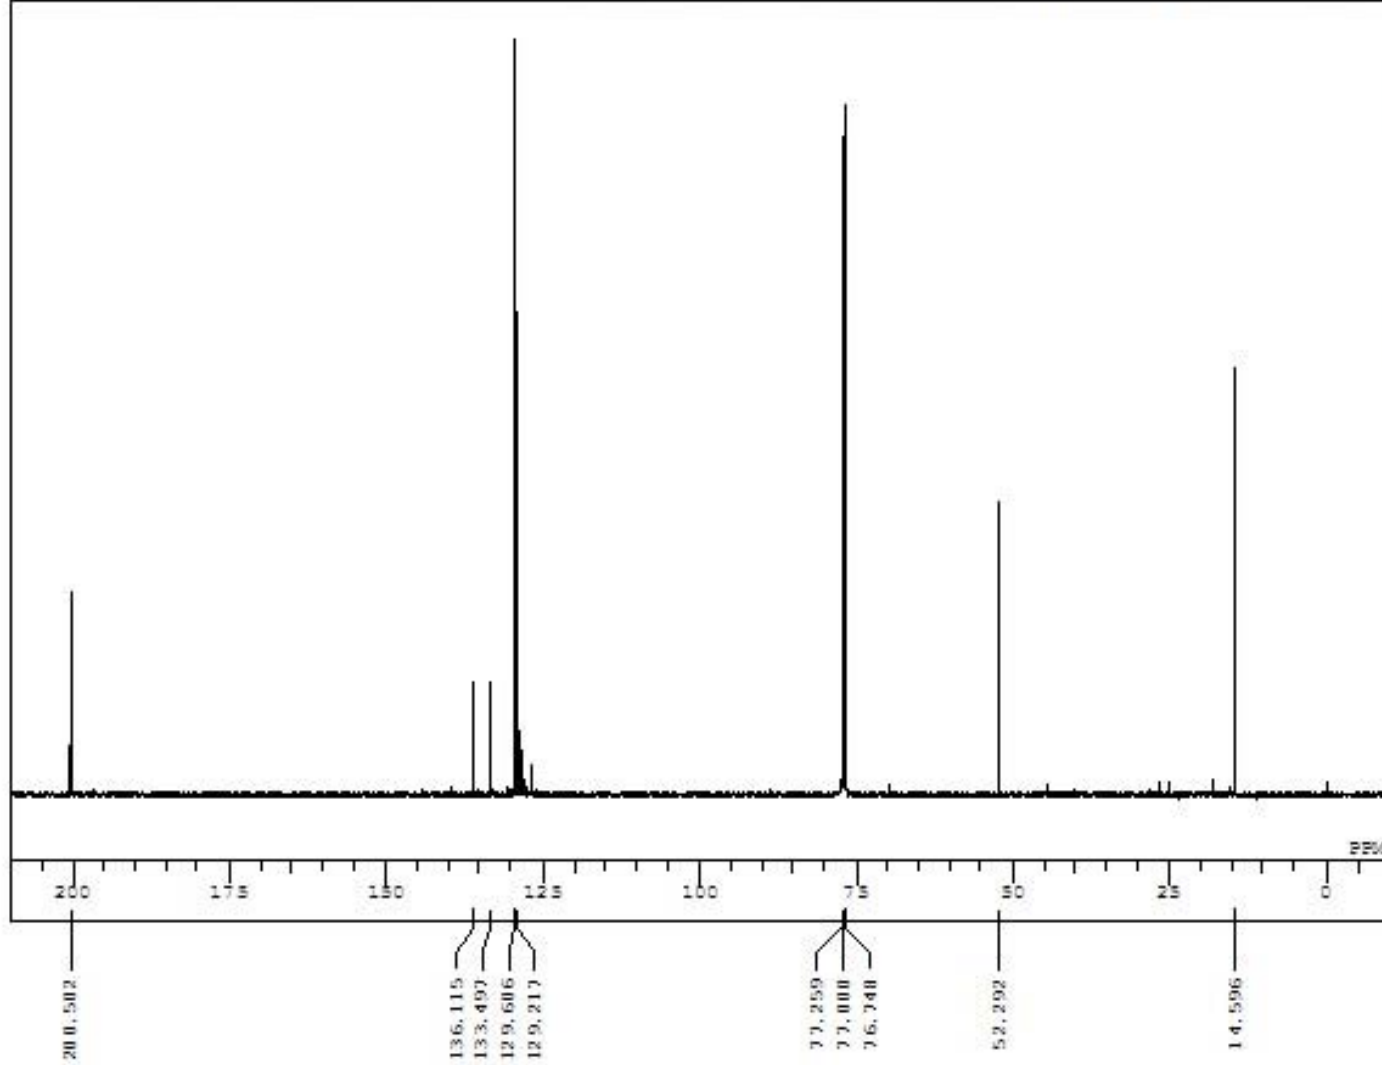

ENMOD single\_pulse\_dec  
 OBFRQ 125.77 MHz  
 OBSET 7.87 KHz  
 OBFIN 4.21 Hz  
 POINT 32768  
 FREQU 31446.54 Hz  
 SCANS 18600  
 ACQTM 1.0420 sec  
 PD 1.0000 sec  
 FWL 4.47 usec  
 IRMUC 1H  
 CTEMP 21.8 c  
 SLVNT CDCL3  
 EXREF 77.00 ppm  
 BF 0.12 Hz  
 RGAIN 28

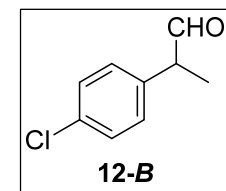

\\fao-c08\o-gchem-lab2\TeamG\17\ZODI-4-22E23\31\*xj\ZAGzff\Alice\mk\_a\_2\_2\_ld\_spectrum.als

DFILE mk\_a\_2\_2\_ld\_spectrum.als  
COMNT Single Pulse Experiment  
DATIM 2011-06-02 12:30:06  
OBNUC 1H  
EXMDD single\_pulse.exp  
OBFRQ 500.16 MHz  
OBSET 2.41 KHz  
OBFIN 6.01 Hz  
POINT 16384  
FREQU 10010.01 Hz  
SCANS 16  
ACQTM 1.6368 sec  
PD 4.0000 sec  
PW1 7.00 usec  
IRNUC  
OTEMP 19.5 c  
SLVMT CDCL3  
EXREF 0.00 ppm  
BF 0.12 Hz  
RGAIN 25

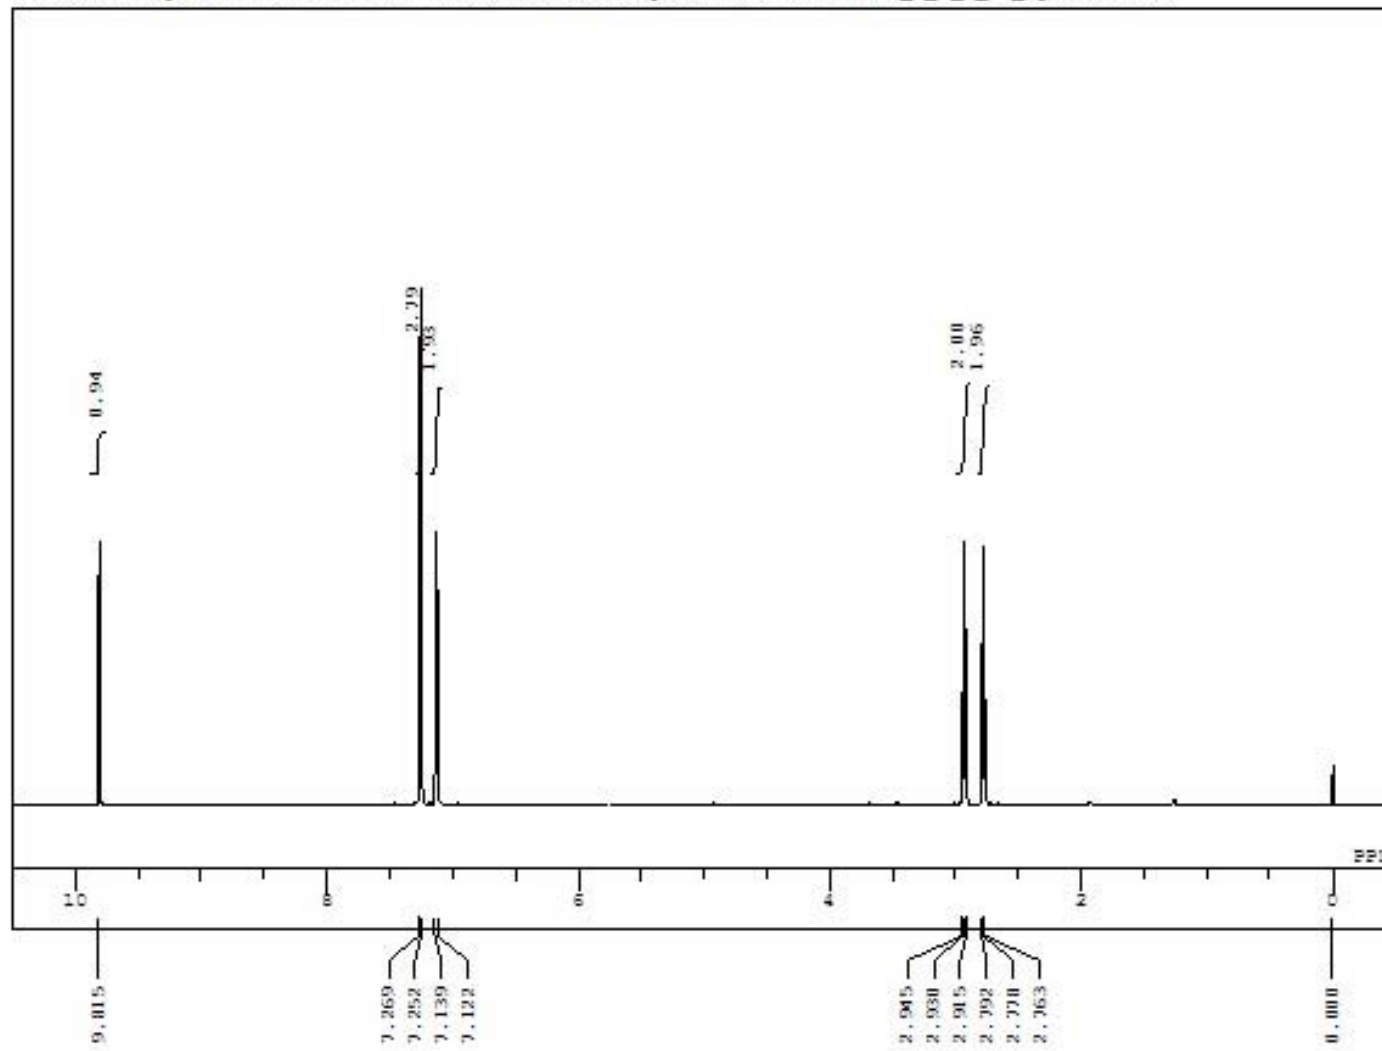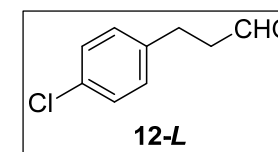

\\fso-c08\orgchem-lab2\TeamG\17\ZODI-H-22E23\31\*xj\ZAGzff(f^)\Alice\mk\_a\_2\_2\_13c\_spectrum.ala

DFILE mk\_a\_2\_2\_13c\_spectrum.ala  
COMNT Single Pulse with Broadband  
DATIM 2011-06-02 12:10:52  
OBNUC 13C  
EXMDD single\_pulse\_dec  
OBFRQ 125.77 MHz  
OBSET 7.87 KHz  
OBFIN 4.21 Hz  
POINT 32768  
FREQU 31446.54 Hz  
SCANS 2048  
ACQTM 1.0420 sec  
PD 1.0000 sec  
FW1 4.47 usec  
IRNUC 1H  
OTEMP 20.7 c  
SLVMT CDCL3  
EXREF 77.00 ppm  
BF 0.12 Hz  
RGAIN 28

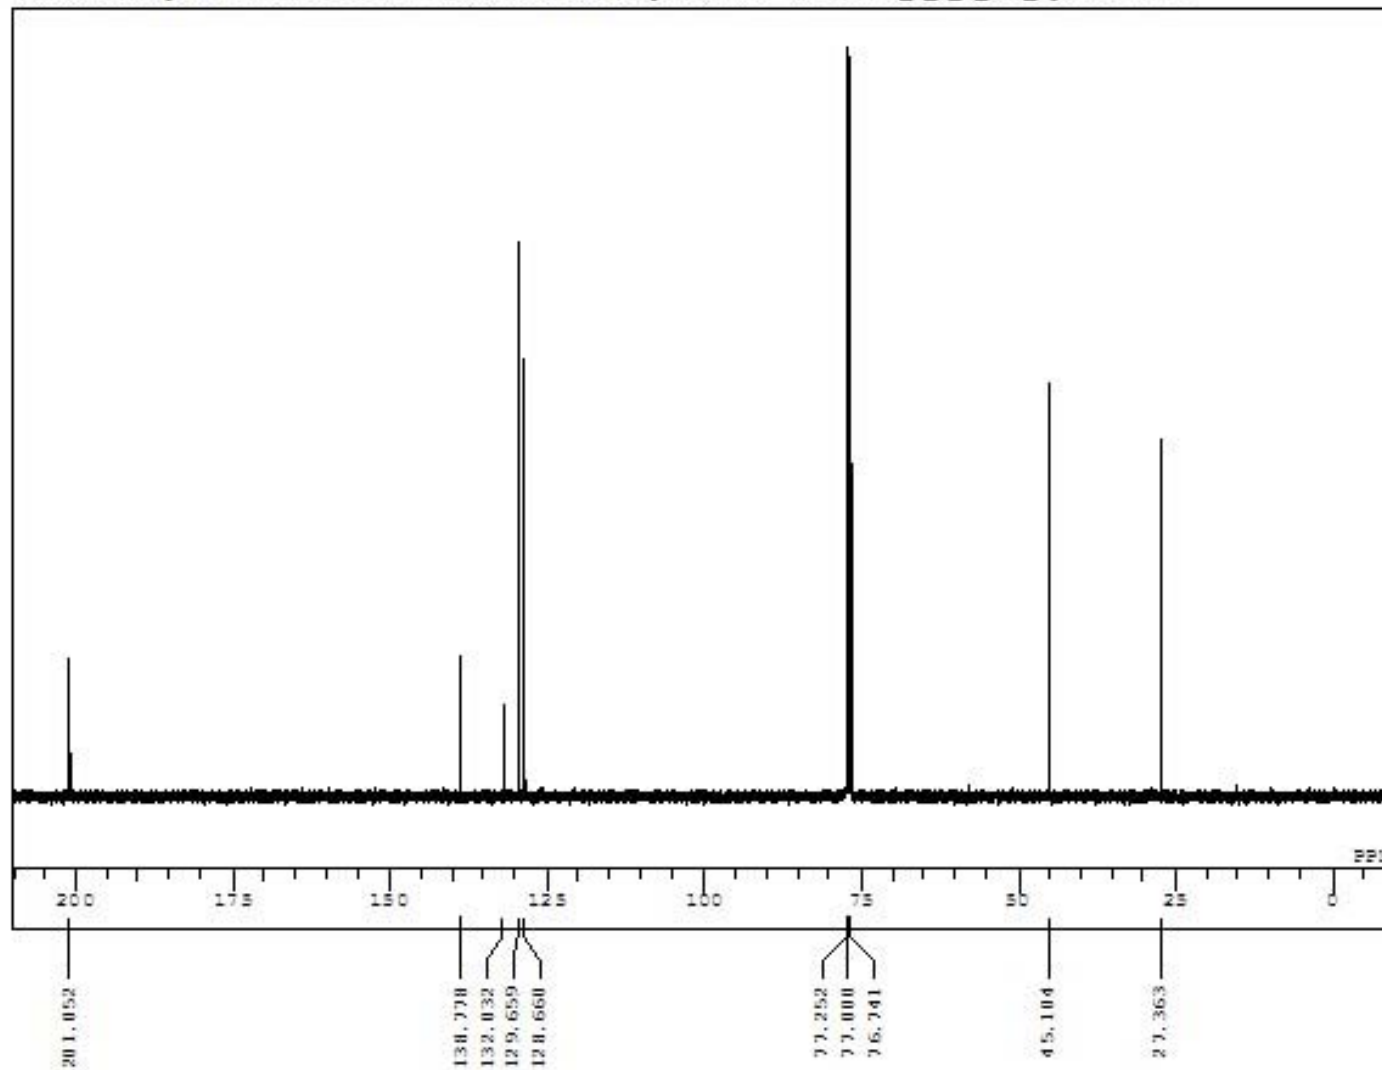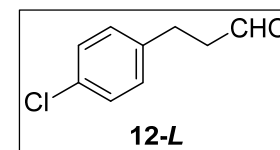

\\fao-c08\o-gchem-lab2\TeamG\171 ZODI-4-22E23"N"xj\ZAGzff(f^\Alice\mk\_a\_9\_1\_2\_id\_spectrum.als

```

DFILE mk_a_9_1_2_id_spectrum.als
COMNT Single Pulse Experiment
DATIM 2012-03-20 14:11:03
OBNUC 1H
EXMDD single_pulse.exp
OBFRQ 500.16 MHz
OBSET 2.41 kHz
OBFIM 6.01 Hz
POINT 16384
FREQU 10010.01 Hz
SCANS 16
ACQTM 1.6368 sec
PD 4.0000 sec
FW1 7.00 usec
IRNUC
OTEMP 21.3 c
SLVMT CDCL3
EXREF 0.00 ppm
BF 0.12 Hz
RGAIN 16
    
```

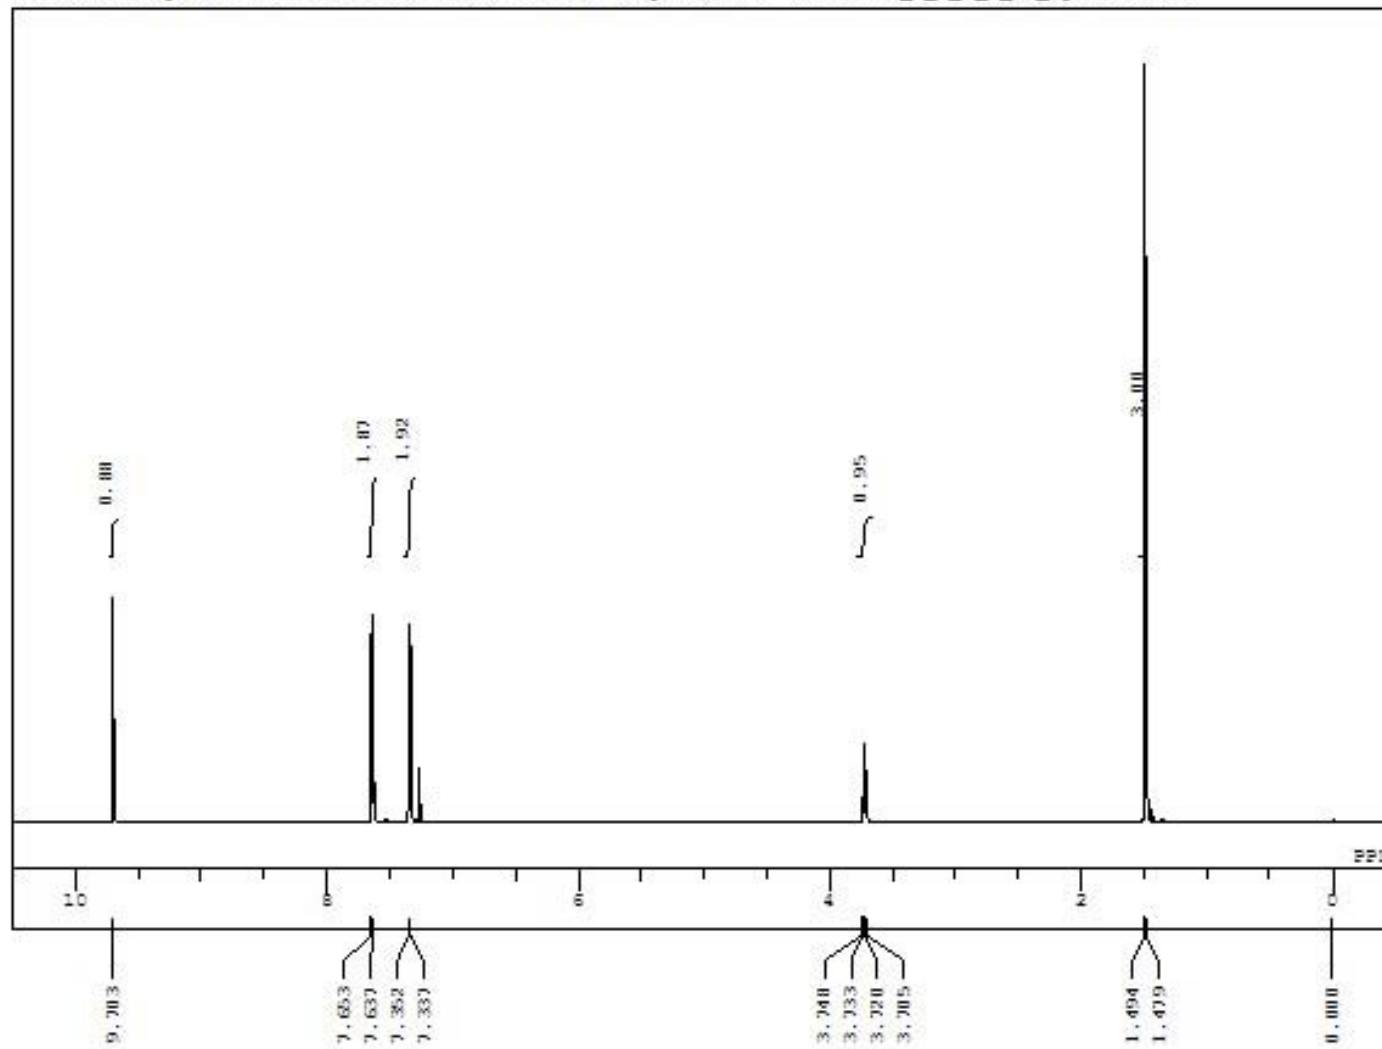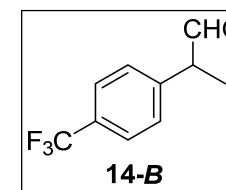

DFILE mk\_a\_9\_1\_13c\_spectrum.ala  
 COMMENT Single Pulse with Broadband  
 \\fao-c08\orgchem-lab2\TeamG\17\ZODI-4-22E23\31\ZAGzff\1\Rel 3C13C\IRMS\HRMS\aldehyde\_B\7\_p-DF3\mk\_a\_9\_1\_13c\_spectrum.ala  
 DATIM 2012-03-20 16:10:56

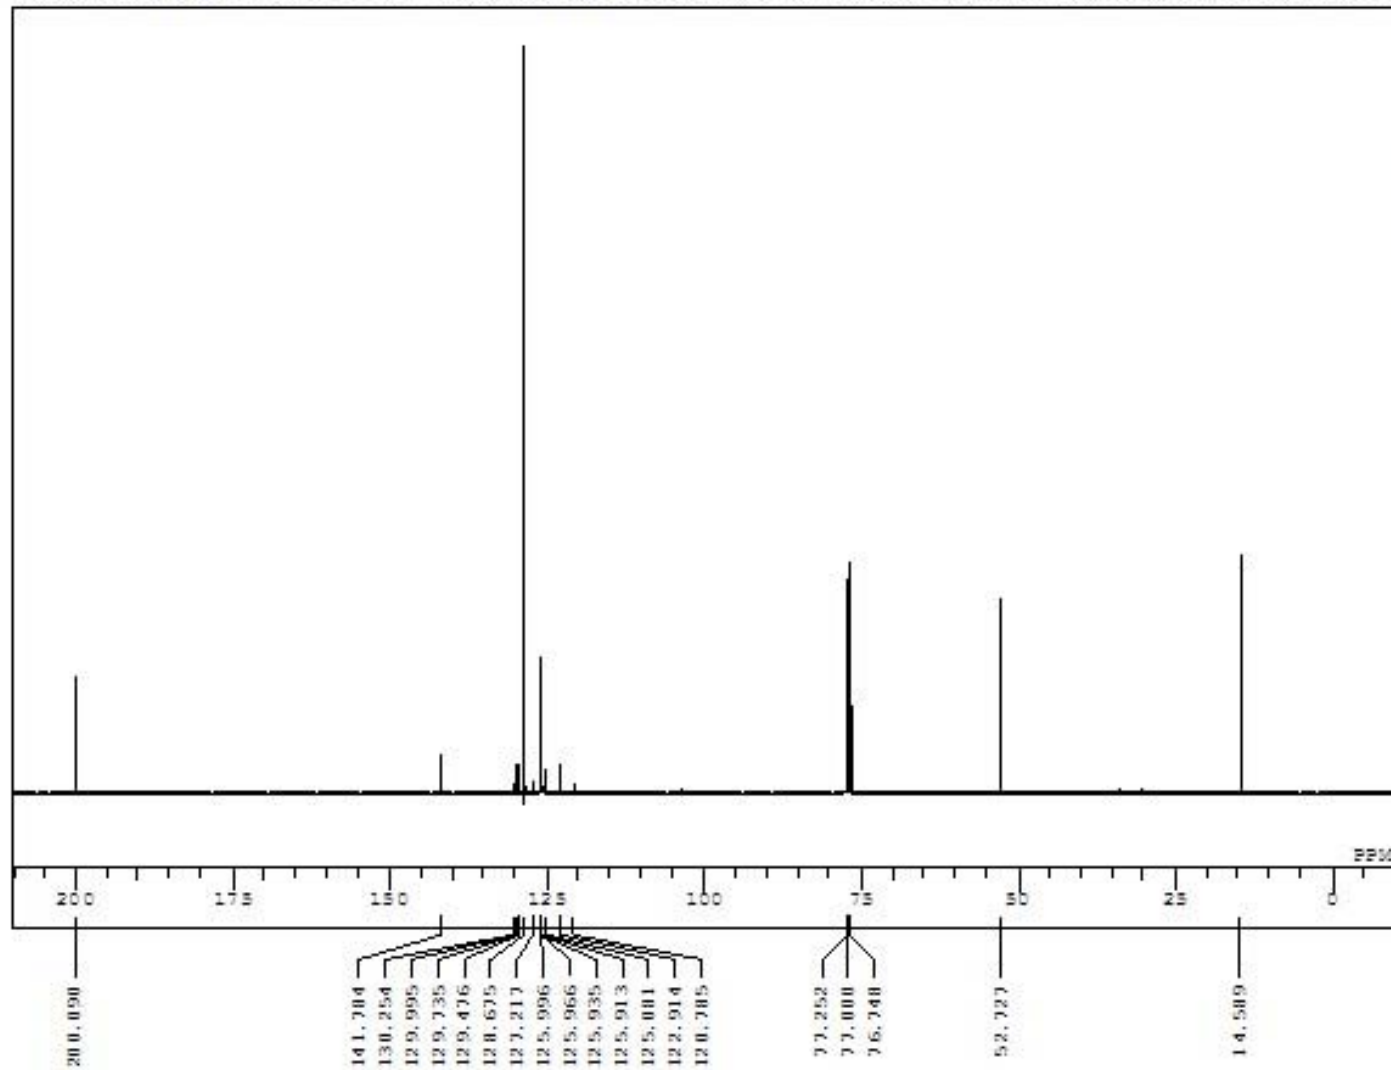

OBNUC 13C  
 EXMDD single\_pulse\_dec  
 OBFRQ 125.77 MHz  
 OBSET 7.87 KHz  
 OBFIM 4.21 Hz  
 POINT 32768  
 FREQU 31446.54 Hz  
 SCANS 7000  
 ACQTM 1.0420 sec  
 PD 1.0000 sec  
 PW1 4.47 usec  
 IRNUC 1H  
 CTEMP 22.8 c  
 SLVMT CDCL3  
 EXREF 77.00 ppm  
 BF 0.12 Hz  
 RGAIN 30

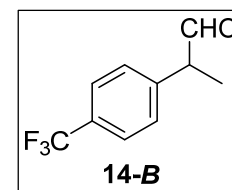

C:\Users\m-kota\Desktop\NMR\jpg\mk\_a\_9\_2\_2\_1d\_spectrum.aia

```
DFILE mk_a_9_2_2_1d_spectrum.aia
COMNT Single Pulse Experiment
DATIM 2012-03-20 11:33:25
OBNUC 1H
EXMDD single_pulse.exp
OBFRQ 500.16 MHz
OBSET 2.41 kHz
OBFIN 6.01 Hz
POINT 16384
FREQU 10010.01 Hz
SCANS 16
ACQTM 1.6368 sec
PD 4.0000 sec
PW1 7.00 usec
IRNUC
OTEMP 20.4 c
SLVNT CDCL3
EXREF 0.00 ppm
BF 0.12 Hz
RGAIN 17
```

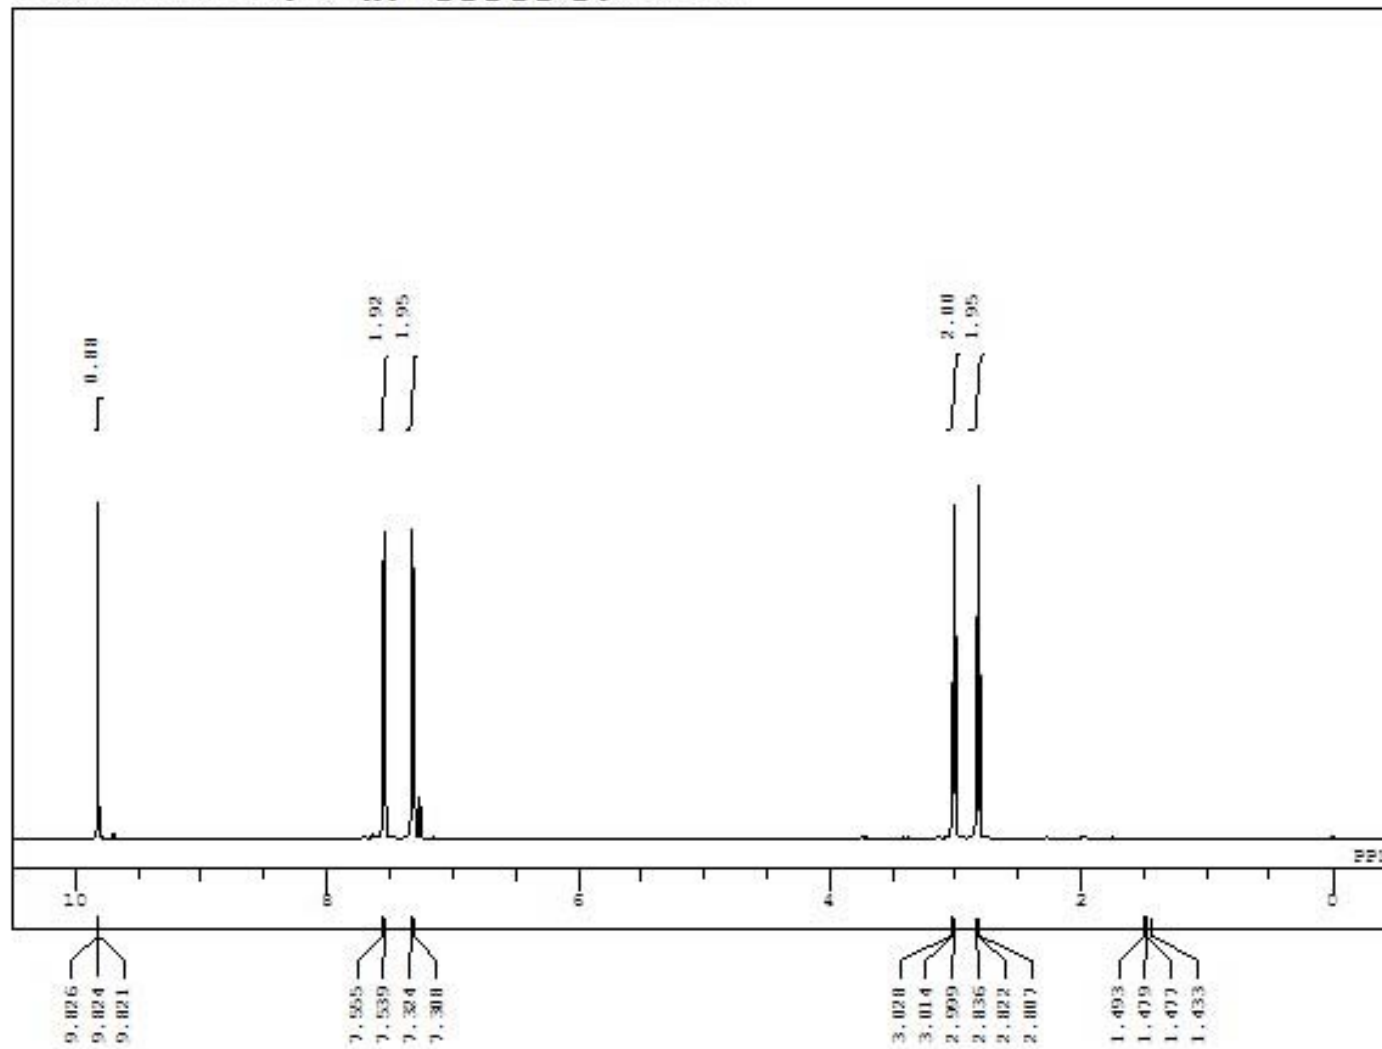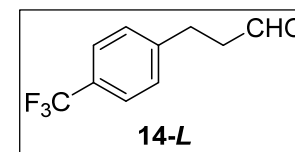



DFILE mk\_a\_9\_2\_13c\_spectrum.ala  
 COMMENT Single Pulse with Broadband  
 \\fao-c08\orgchem-lab2\TeamG\17\ZODI-4-22E23\31x\ZAGsff(f^1Hs13CNGrIRMSsHRMS)\aldehyde\_I\7\_p-DF3\mk\_a\_9\_2\_13c\_spectrum.ala  
 DATIM 2012-01-19 07:25:20

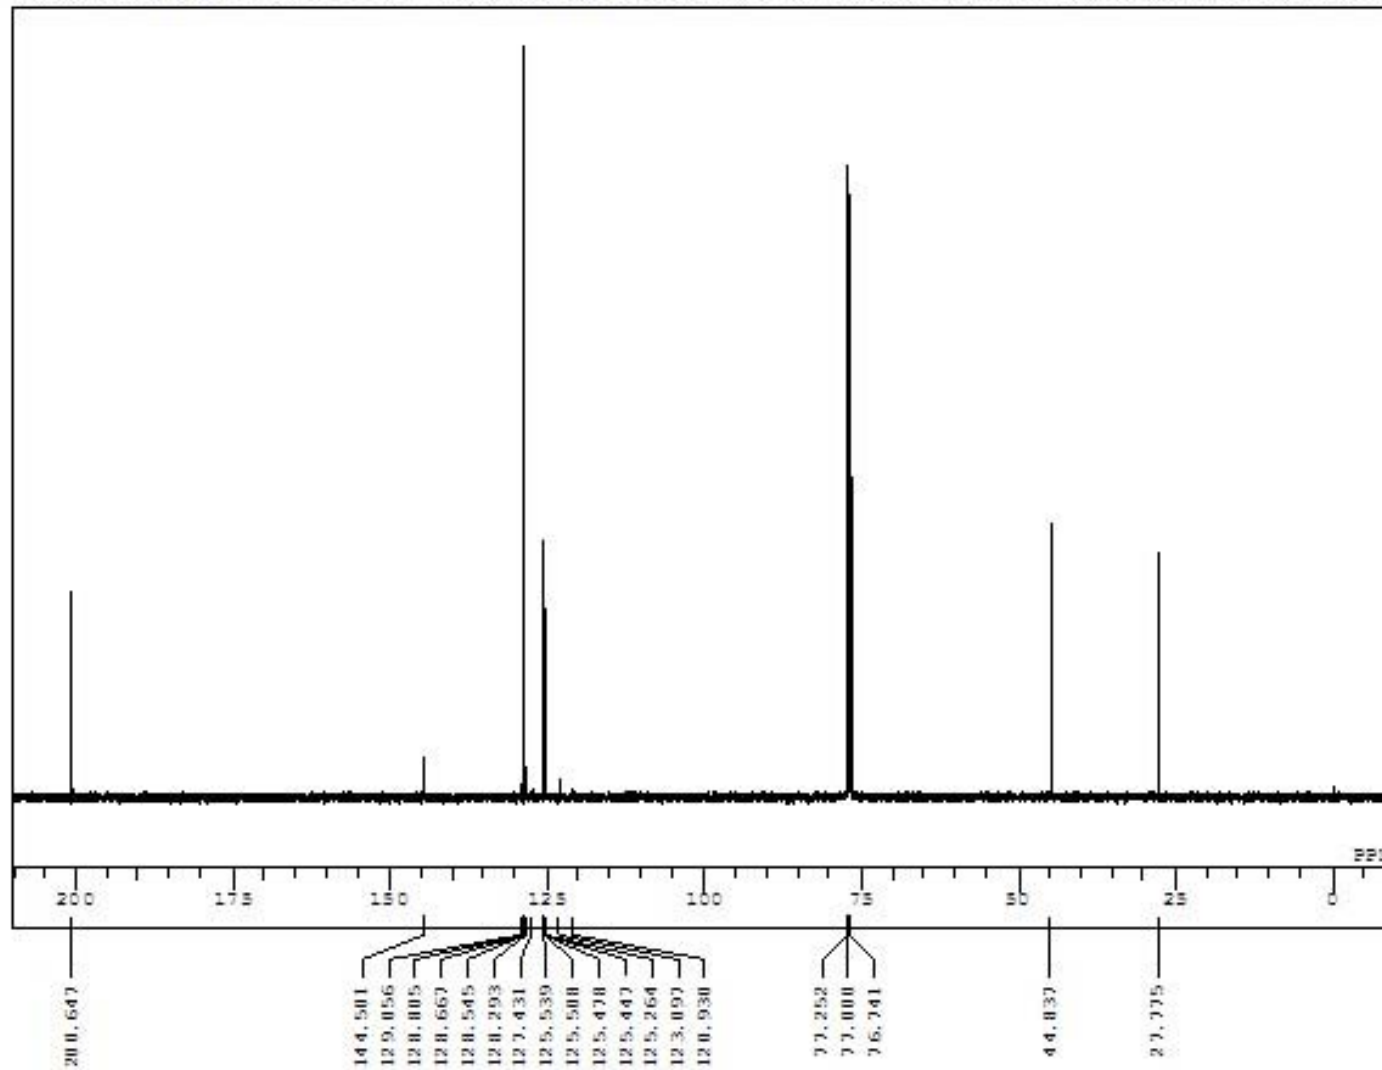

OBNUC 13C  
 EXMOD single\_pulse\_dec  
 OBFRQ 125.77 MHz  
 OBSET 7.87 KHz  
 OBFIM 4.21 Hz  
 POINT 32768  
 FREQU 31446.54 Hz  
 SCANS 8900  
 ACQTM 1.0420 sec  
 PD 1.0000 sec  
 PW1 4.47 usec  
 IRNUC 1H  
 CTEMP 20.5 c  
 SLVNT CDCL3  
 EXREF 77.00 ppm  
 BF 0.12 Hz  
 RGAIN 30

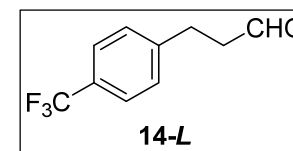

\\fao-c08\oegchem-lab2\TeamG\17\ZODI-4-22E23\31\*xj\ZAGzff\Alice\mk\_a\_7\_1\_id\_spectrum.als

```

DFILE mk_a_7_1_id_spectrum.als
COMENT Single Pulse Experiment
DATIM 2012-03-01 16:49:04
OBNUC 1H
EXMDD single_pulse.exp
OBFRQ 500.16 MHz
OBSET 2.41 kHz
OBFIN 6.01 Hz
POINT 16384
FREQU 10010.01 Hz
SCANS 16
AQTM 1.6368 sec
PD 4.0000 sec
FW1 7.00 usec
IRNUC 1H
OTEMP 16.4 c
SLVNT CDCL3
EXREF 0.00 ppm
BF 0.12 Hz
RGAIN 18
    
```

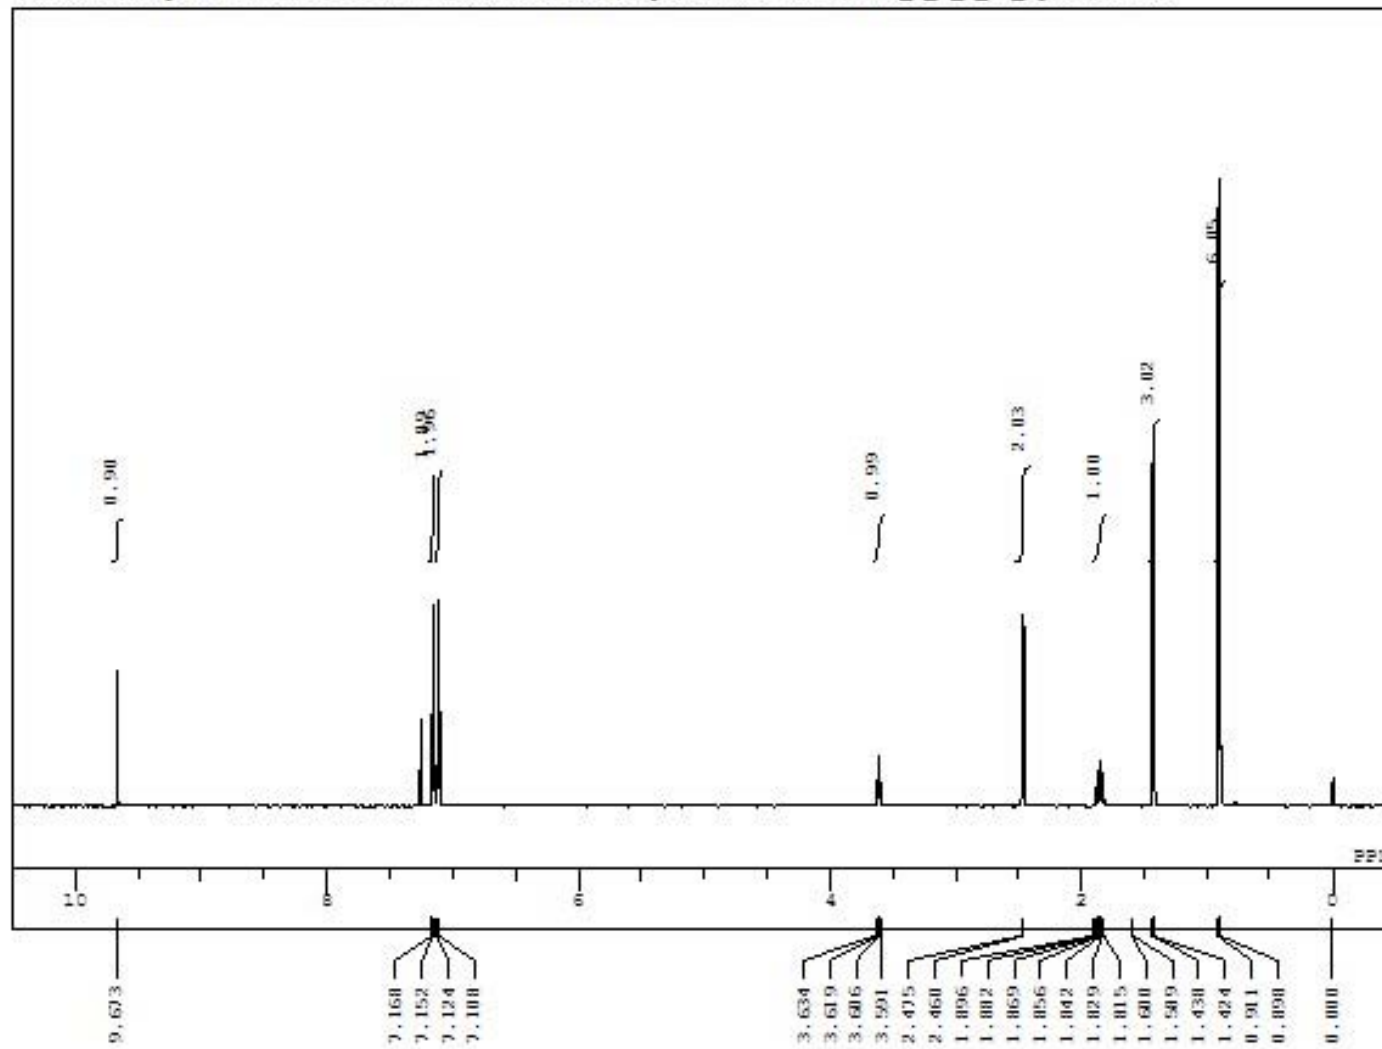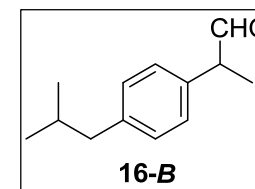

\\fso-c08\orgchem-lab2\TeamG\17\ZODI-4-22E23"N"xj\ZAGzff(f^\Alice\mk\_a\_7\_1\_2\_13c\_spectrum.als

DFILE mk\_a\_7\_1\_2\_13c\_spectrum.als  
COMNT Single Pulse with Broadband  
DATIM 2012-03-01 17:53:25  
OBNUC 13C  
EXMDD single\_pulse\_dec  
OBFRQ 125.77 MHz  
OBSET 7.87 KHz  
OBFIN 4.21 Hz  
POINT 32768  
FREQU 31446.54 Hz  
SCANS 800  
ACQTM 1.0420 sec  
PD 1.0000 sec  
FW1 4.47 usec  
IRNUC 1H  
OTEMP 18.3 c  
SLVMT CDCL3  
EXREF 77.00 ppm  
BF 0.12 Hz  
RGAIN 30

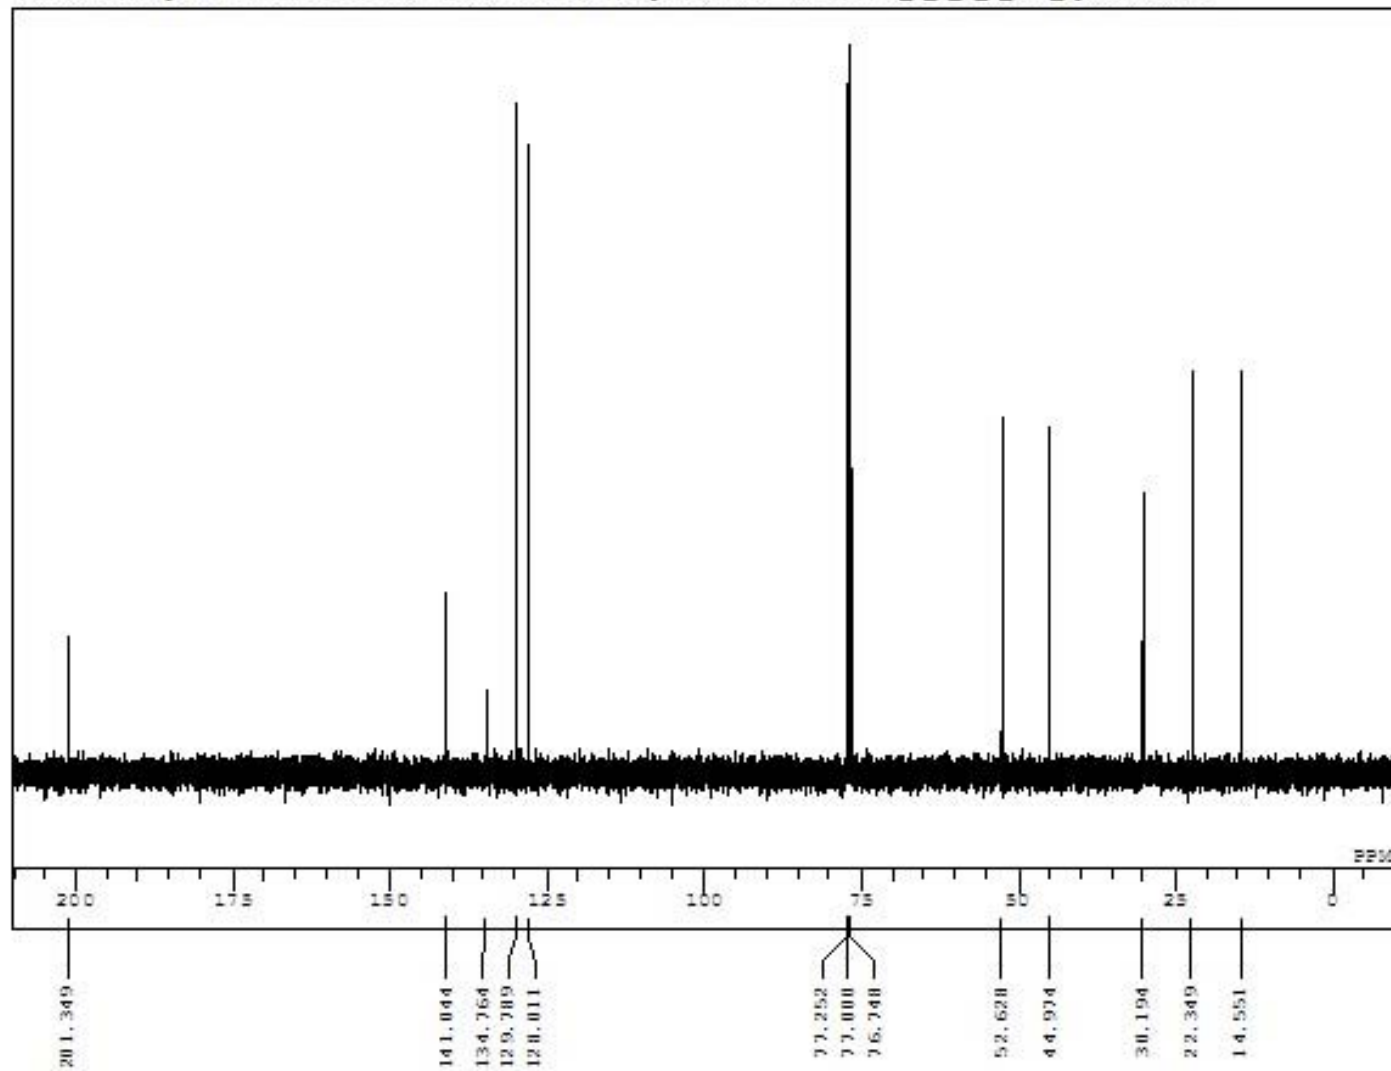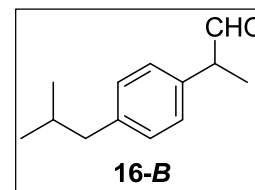

\\fao-c08\oegchem-lab2\TeamG\17\ZODI-4-22E23\31\*xj\ZAGzff\Alice\mk\_a\_7\_2\_1d\_spectrum.als

```

DFILE mk_a_7_2_1d_spectrum.als
COMNT Kugel
DATIM 2011-06-29 22:07:27
OBNUC 1H
EXMDD single_pulse.exp
OBFRQ 500.16 MHz
OBSET 2.41 kHz
OBFIN 6.01 Hz
POINT 16384
FREQU 10010.01 Hz
SCANS 16
AQTM 1.6368 sec
PD 4.0000 sec
PWL 7.00 usec
IRNUC
OTEMP 22.3 c
SLVNT CDCL3
EXREF 7.26 ppm
BF 0.12 Hz
RGAIN 17
    
```

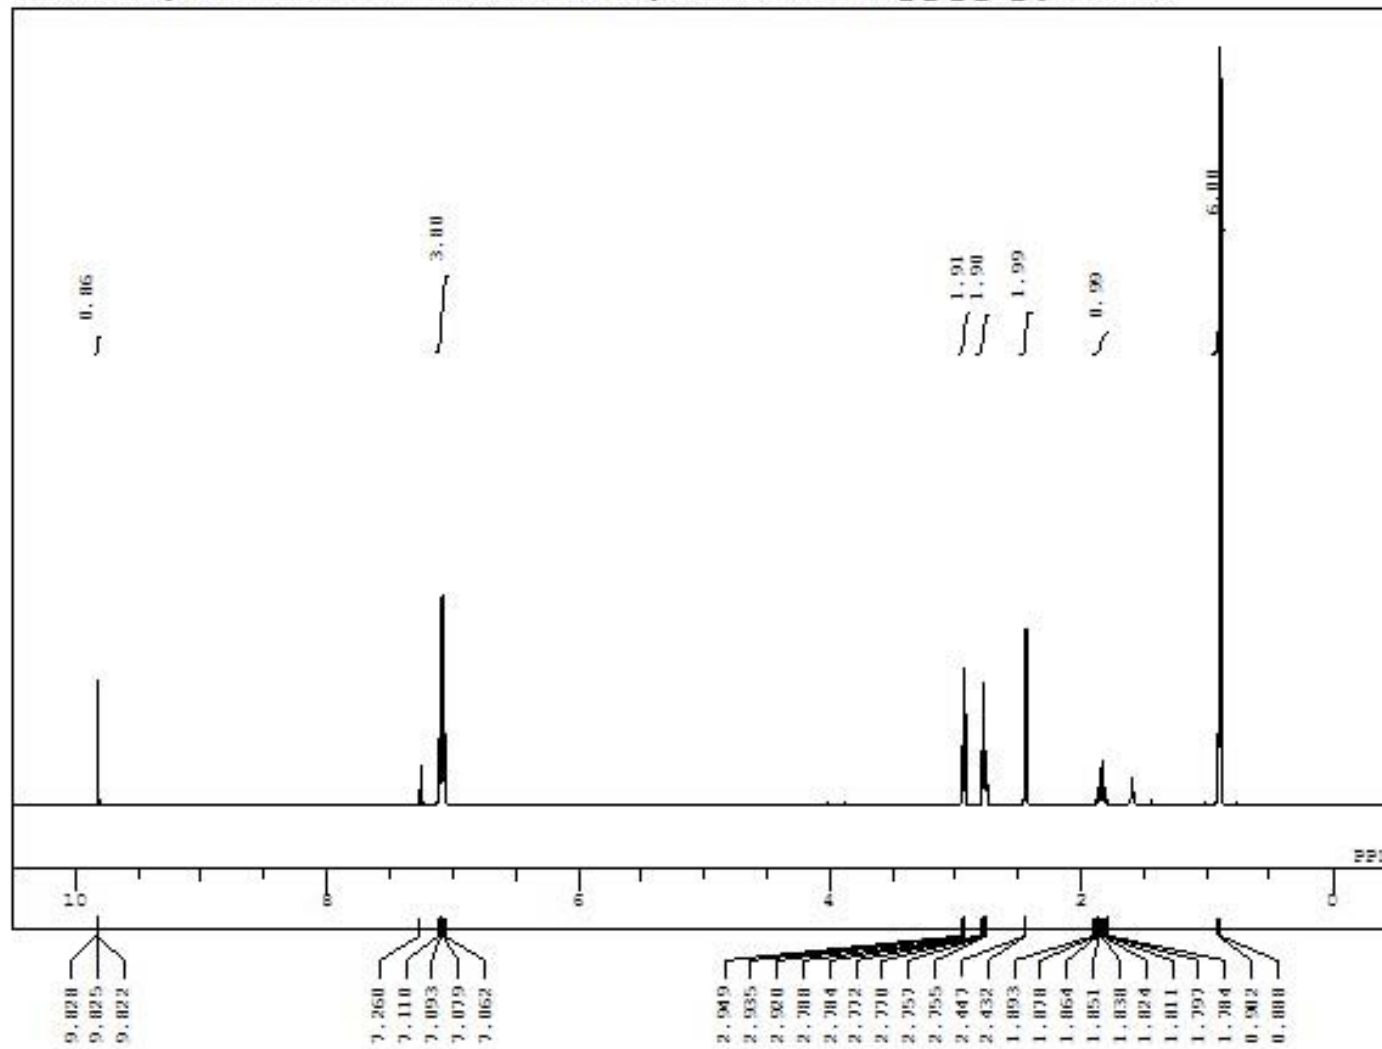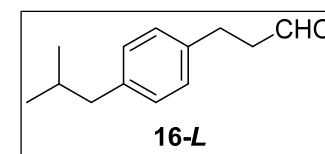

\\Fao-c08\orgchem-lab2\Team2\ (17) ZODI-4-22E23\N\Xj\ZAZzff\Alice\mk\_s\_7\_2\_13c\_spectrum.als

```

DFILE mk_s_7_2_13c_spectrum.als
COMMT Single Pulse with Broadband
DATIM 2011-09-29 08:41:32
CNMUC 13C
ENMOD single_pulse_dec
OBFRQ 125.77 MHz
OBSET 7.87 KHz
OBFIN 4.21 Hz
POINT 32768
FREQU 31446.54 Hz
SCANS 11500
AQQT 1.0420 sec
PD 1.0000 sec
PWL 4.47 usec
IRNUC 1H
CTEMP 21.8 c
SLVNT CDCL3
EKREF 77.00 ppm
BF 0.12 Hz
RGAIN 30
    
```

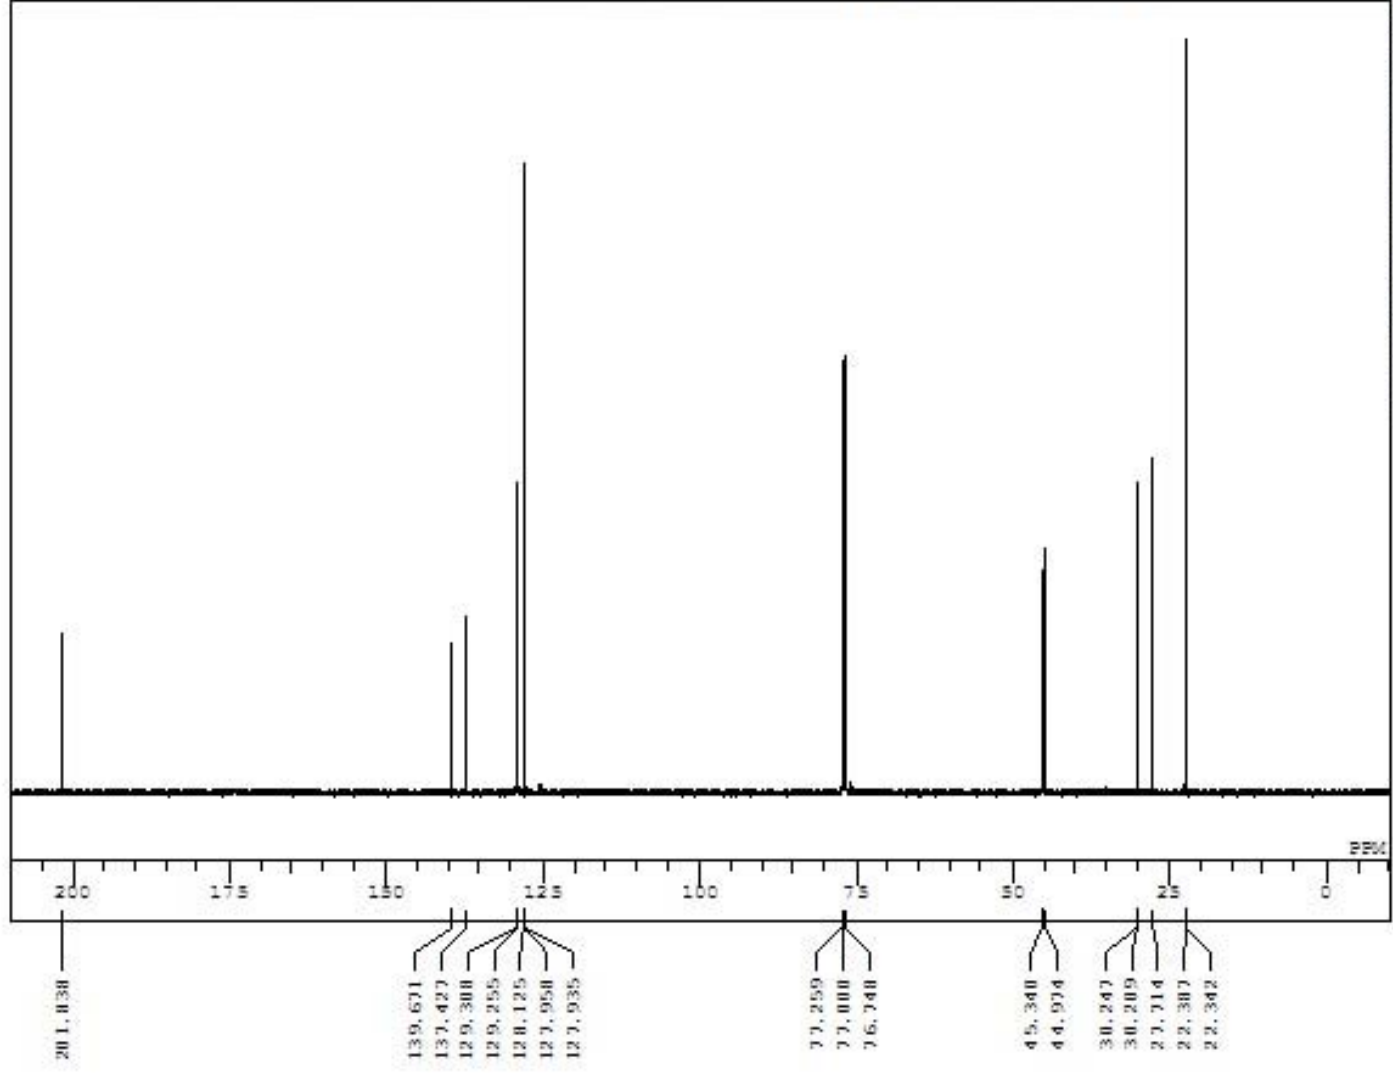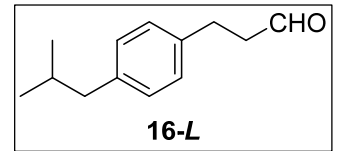

\\fao-c08\oegchem-lab2\TeamG\17\ZODI-4-22E23\31\*xj\ZAGzff\Alice\mk\_e\_8\_1\_id\_spectrum.als

```

DFILE mk_e_8_1_id_spectrum.als
COMENT Single Pulse Experiment
DATIM 2011-09-14 17:04:48
OBNUC 1H
EXMDD single_pulse.exp
OBFRQ 500.16 MHz
OBSET 2.41 kHz
OBFIN 6.01 Hz
POINT 16384
FREQU 10010.01 Hz
SCANS 16
AQTM 1.6368 sec
PD 4.0000 sec
FW 7.00 usec
IRNUC
OTEMP 21.6 c
SLVNT CDCL3
EXREF 0.00 ppm
BF 0.12 Hz
RGAIN 23
    
```

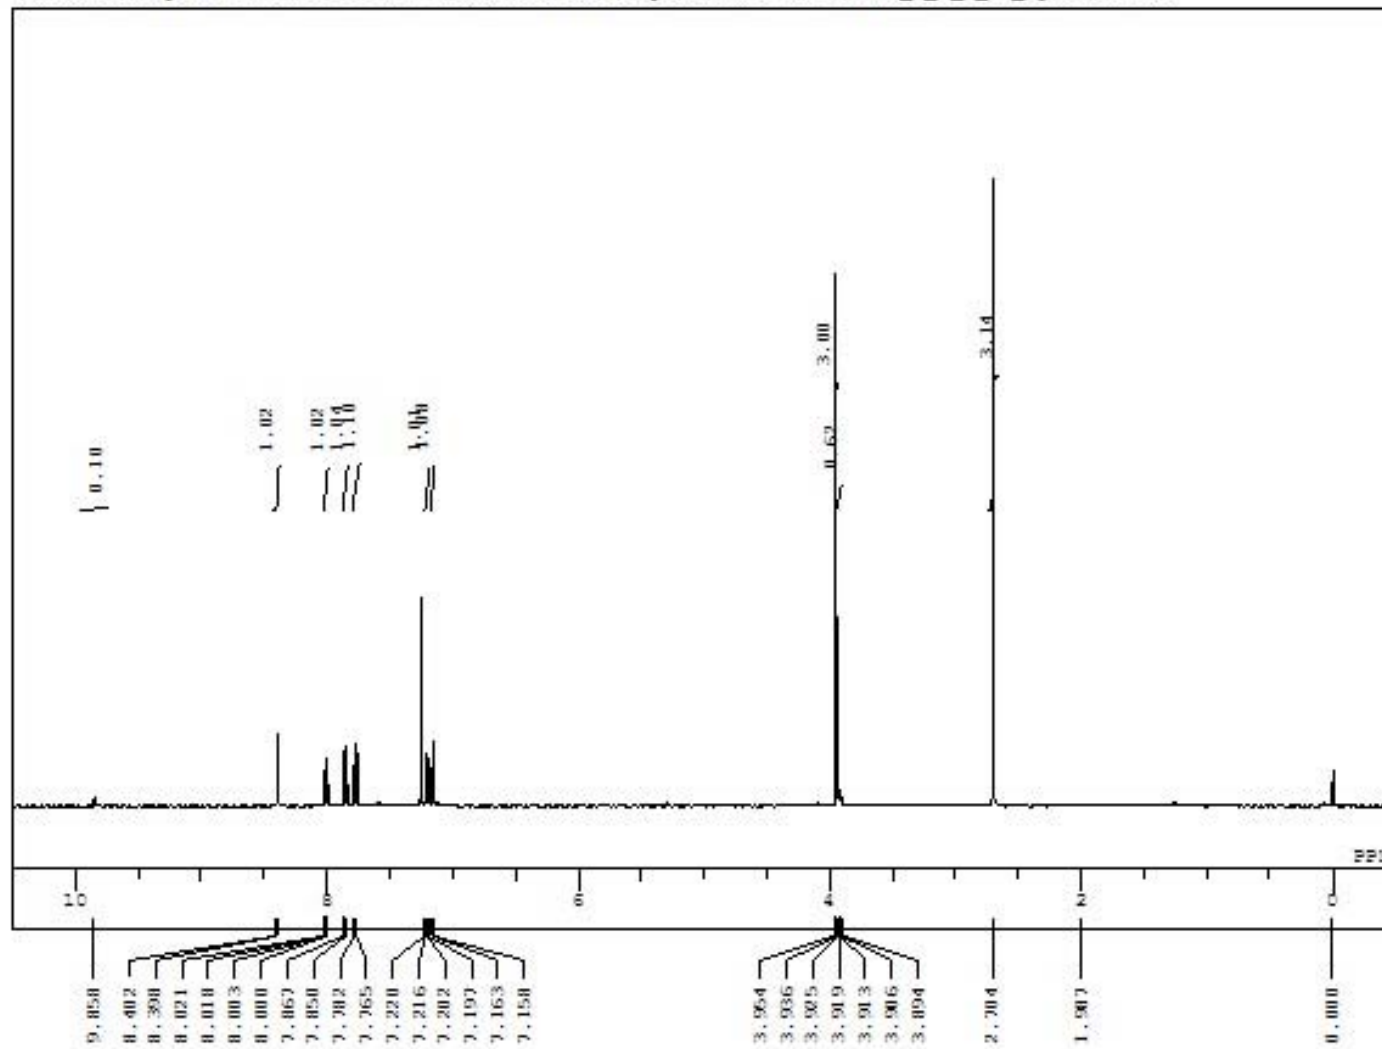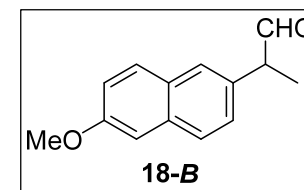

\\Fao-008\orgchem-lab2\Team2\ (17) ZODI-4-2ZE23\N\Xj\ZAZ-fs[f^Alicia\mk\_s\_6\_1\_2\_13c\_spectrum.ala

DFILE mk\_s\_6\_1\_2\_13c\_spectrum.ala  
COMMT Single Pulse with Broadband  
DATIM 2011-09-30 08:34:14  
CENUC 13C  
EXMOD single\_pulse\_dec  
OBFRQ 125.77 MHz  
OBSET 7.87 KHz  
OBFIN 4.21 Hz  
POINT 32768  
FREQU 31446.54 Hz  
SCANS 18000  
AQTM 1.0420 sec  
PD 1.0000 sec  
PWL 4.47 usec  
IRNUC 1H  
CTEMP 22.0 c  
SLVNT CDCL3  
EKREF 77.00 ppm  
BF 0.12 Hz  
RGAIN 28

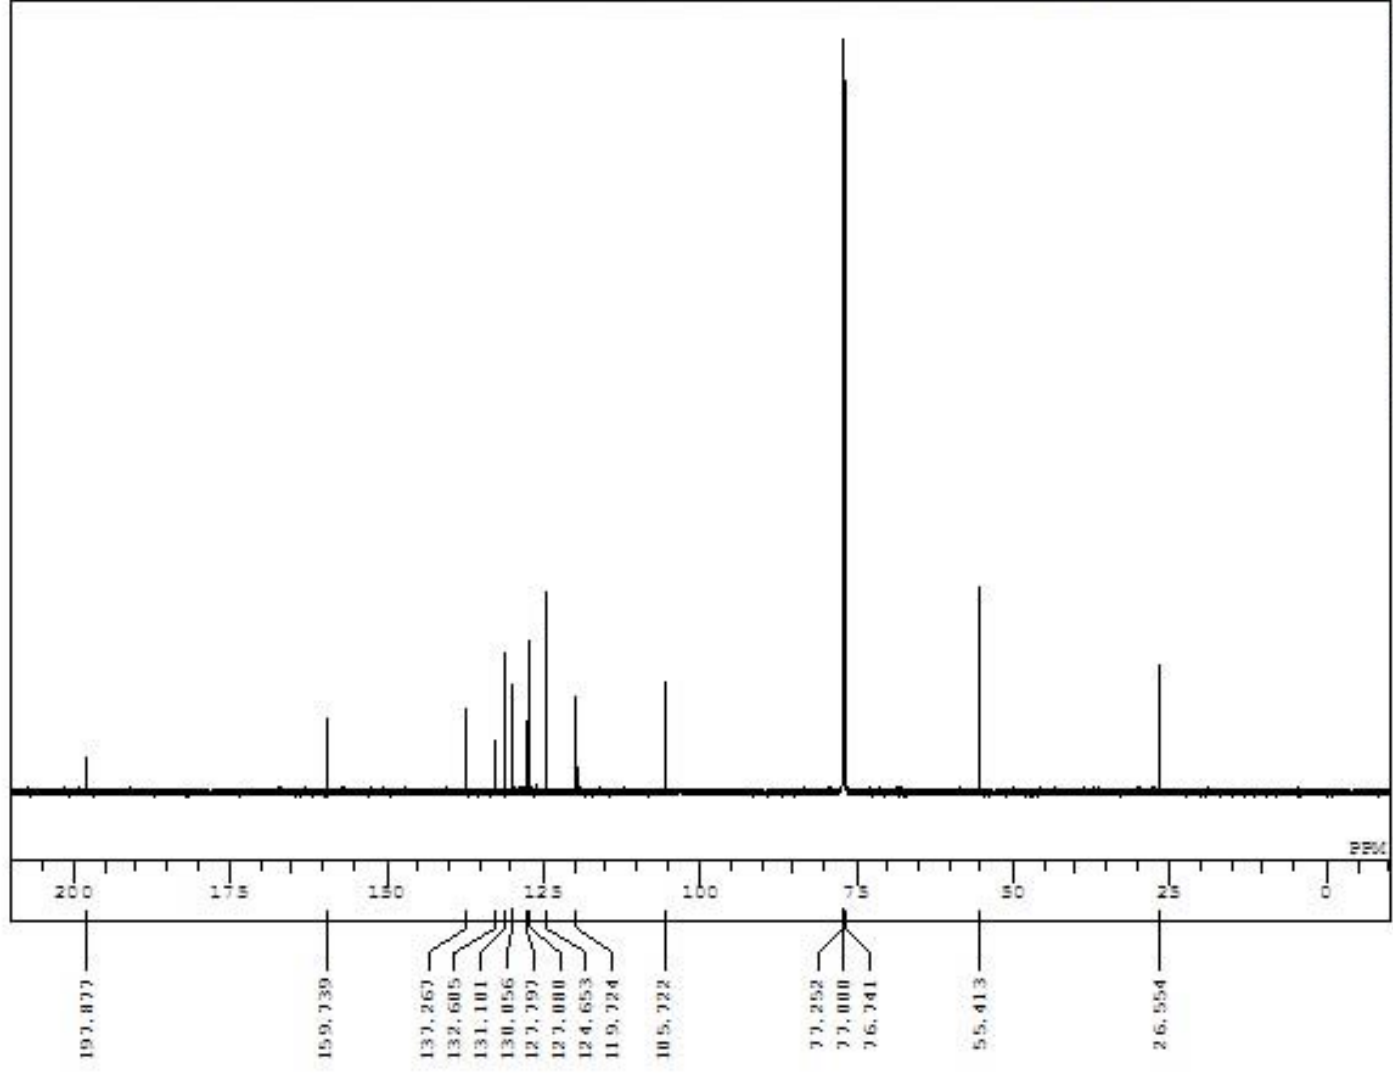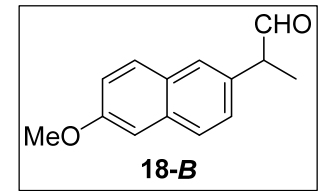

Z:\profiles.mandara-domain.V2\NMR\ff\mk\_a\_8\_2\_4\_1d\_spectrum.1

```

DFILE mk_a_8_2_4_1d_spectrum.1
COMENT Single Pulse Experiment
DATIM 2012-03-26 04:57:35
OBNUC 1H
EXMDD single_pulse.exp
OBFRQ 500.16 MHz
OBSET 2.41 kHz
OBFIN 6.01 Hz
POINT 16384
FREQU 10010.01 Hz
SCANS 16
AQTM 1.6368 sec
PD 4.0000 sec
PW1 7.00 usec
IRNUC
OTEMP 19.6 c
SOLVENT CDCL3
EXREF 0.00 ppm
BF 0.12 Hz
RGAIN 18
    
```

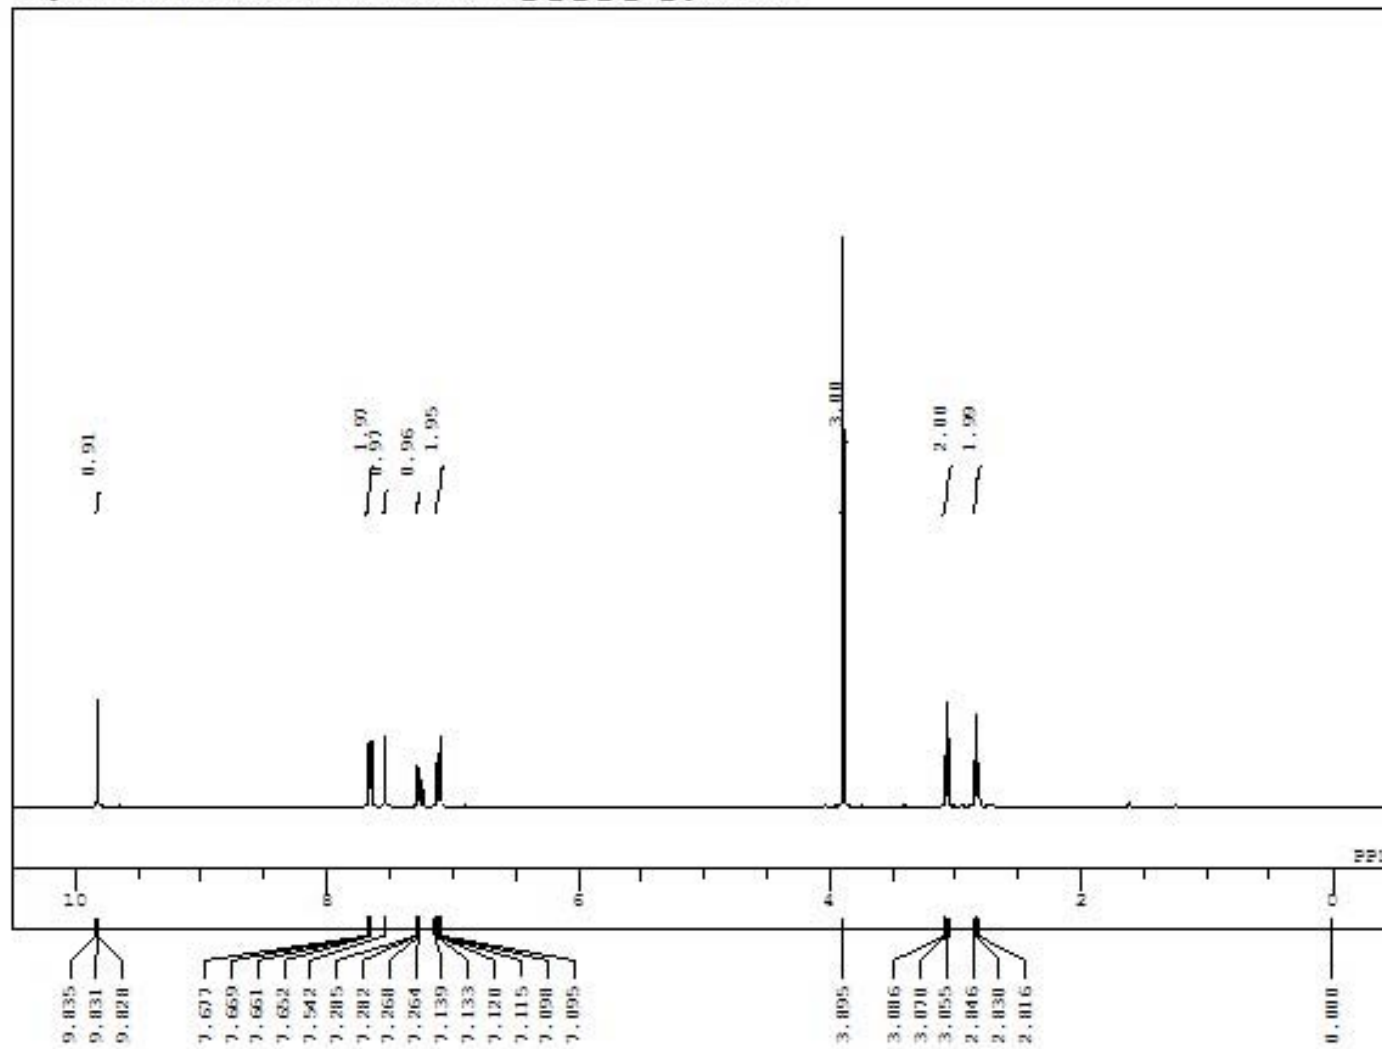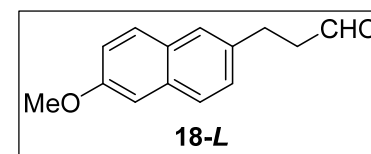



\\Fao-c08\orgchem-lab2\Team2\ (17) ZODI-4-2ZE23\N\XJ\ EAG-fs\Alicia\mk\_s\_6\_2\_4\_13c\_spectrum.ala

DFILE mk\_s\_6\_2\_4\_13c\_spectrum.ala  
COMMT Single Pulse with Broadband  
DATIM 2012-03-26 07:48:37  
CENUC 13C  
EXMOD single\_pulse\_dec  
OBFRQ 125.77 MHz  
OBSET 7.87 KHz  
OBFIN 4.21 Hz  
POINT 32768  
FREQU 31446.54 Hz  
SCANS 5000  
AQTM 1.0420 sec  
PD 1.0000 sec  
PWL 4.47 usec  
IRNUC 1H  
CTEMP 21.6 c  
SLVNT CDCL3  
EKREF 77.00 ppm  
BF 0.12 Hz  
RGAIN 30

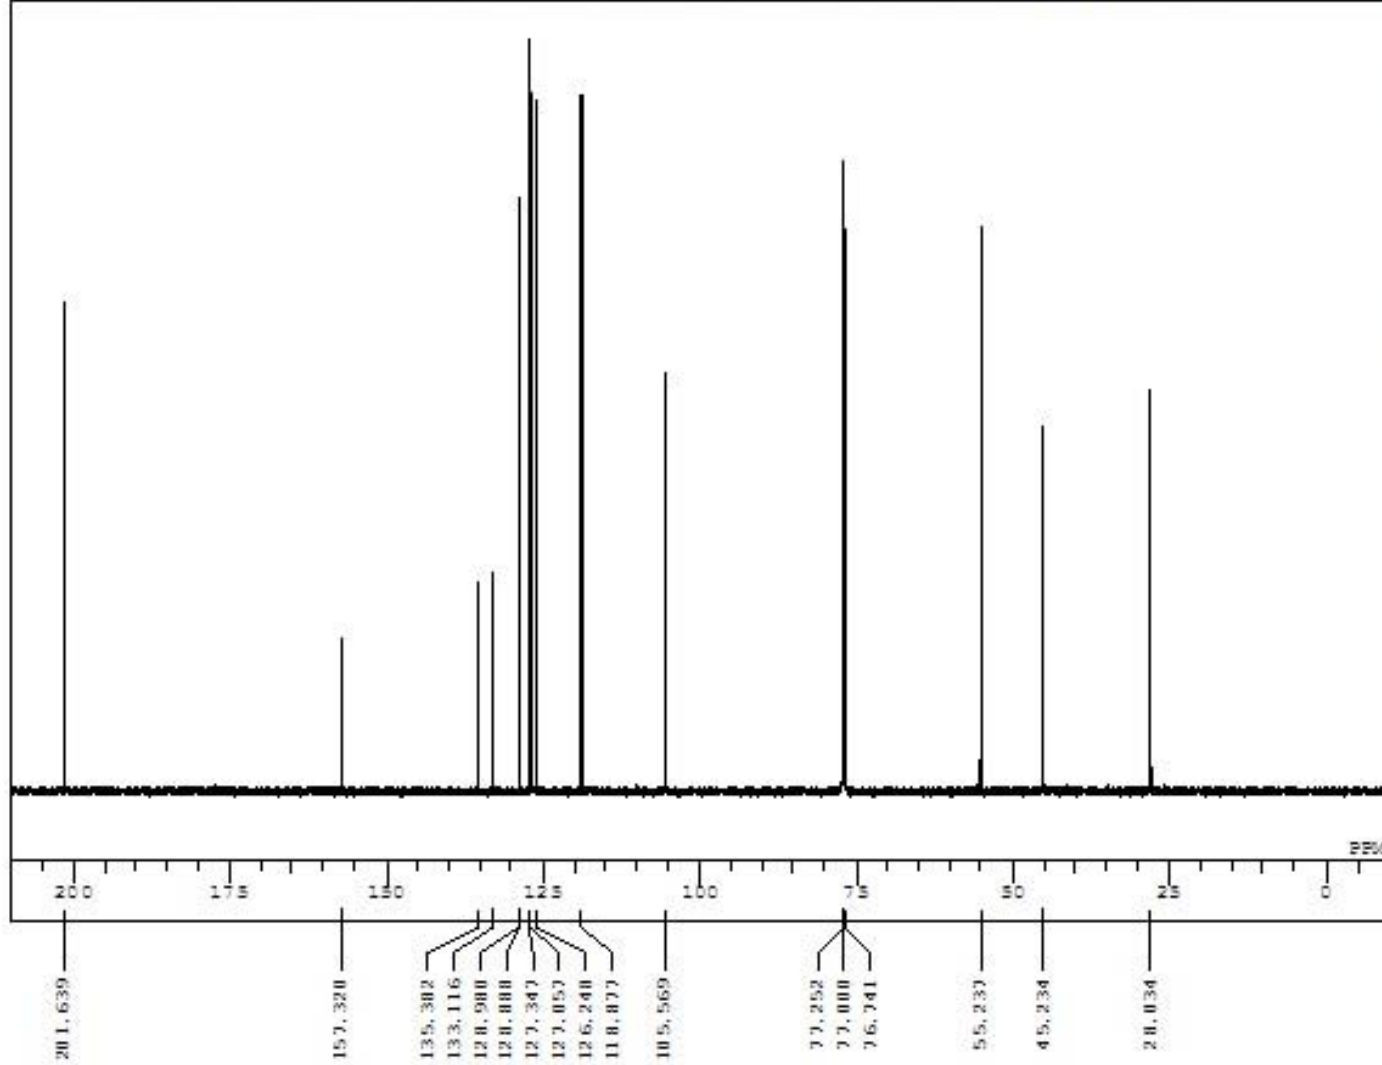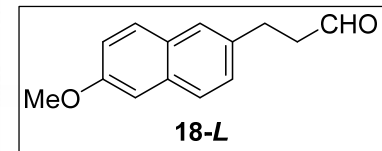

14. <sup>1</sup>H & <sup>13</sup>C NMR Charts of Reductants of Aldehydes 2, 4, 6, 8, 10, 12, 14, 16, and 18.

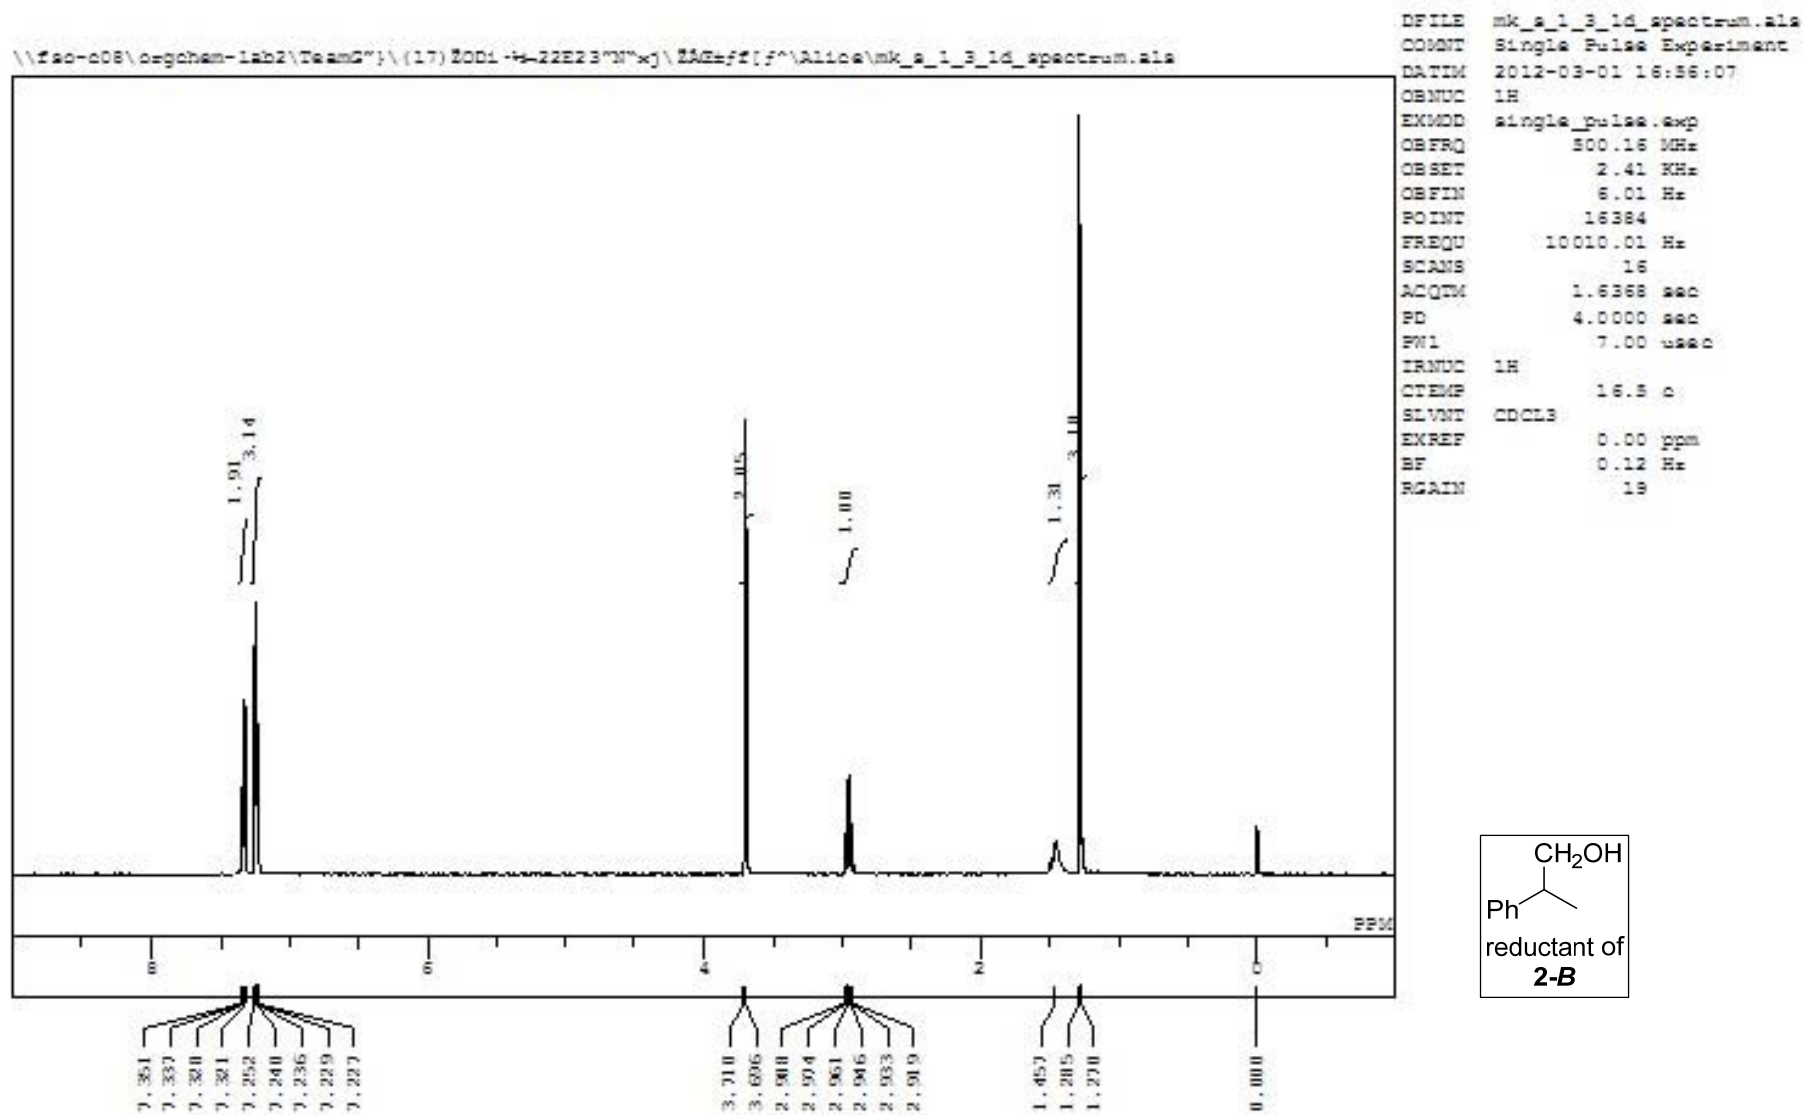

\\fso-c08\orgchem-lab2\TeamG\17\ZODI-4-22E23\31\*xj\ZAGzff(f^)\Alice\mk\_a\_1\_3\_13c\_spectrum.aie

DFILE mk\_a\_1\_3\_13c\_spectrum.aie  
COMNT Single Pulse with Broadband  
DATIM 2012-03-01 17:20:54  
OBNUC 13C  
EXMDD single\_pulse\_dec  
OBFRQ 125.77 MHz  
OBSET 7.87 KHz  
OBFIN 4.21 Hz  
POINT 32768  
FREQU 31446.54 Hz  
SCANS 700  
ACQTM 1.0420 sec  
PD 1.0000 sec  
PW1 4.47 usec  
IRNUC 1H  
OTEMP 18.8 c  
SLVMT CDCL3  
EXREF 77.00 ppm  
BF 0.12 Hz  
RGAIN 28

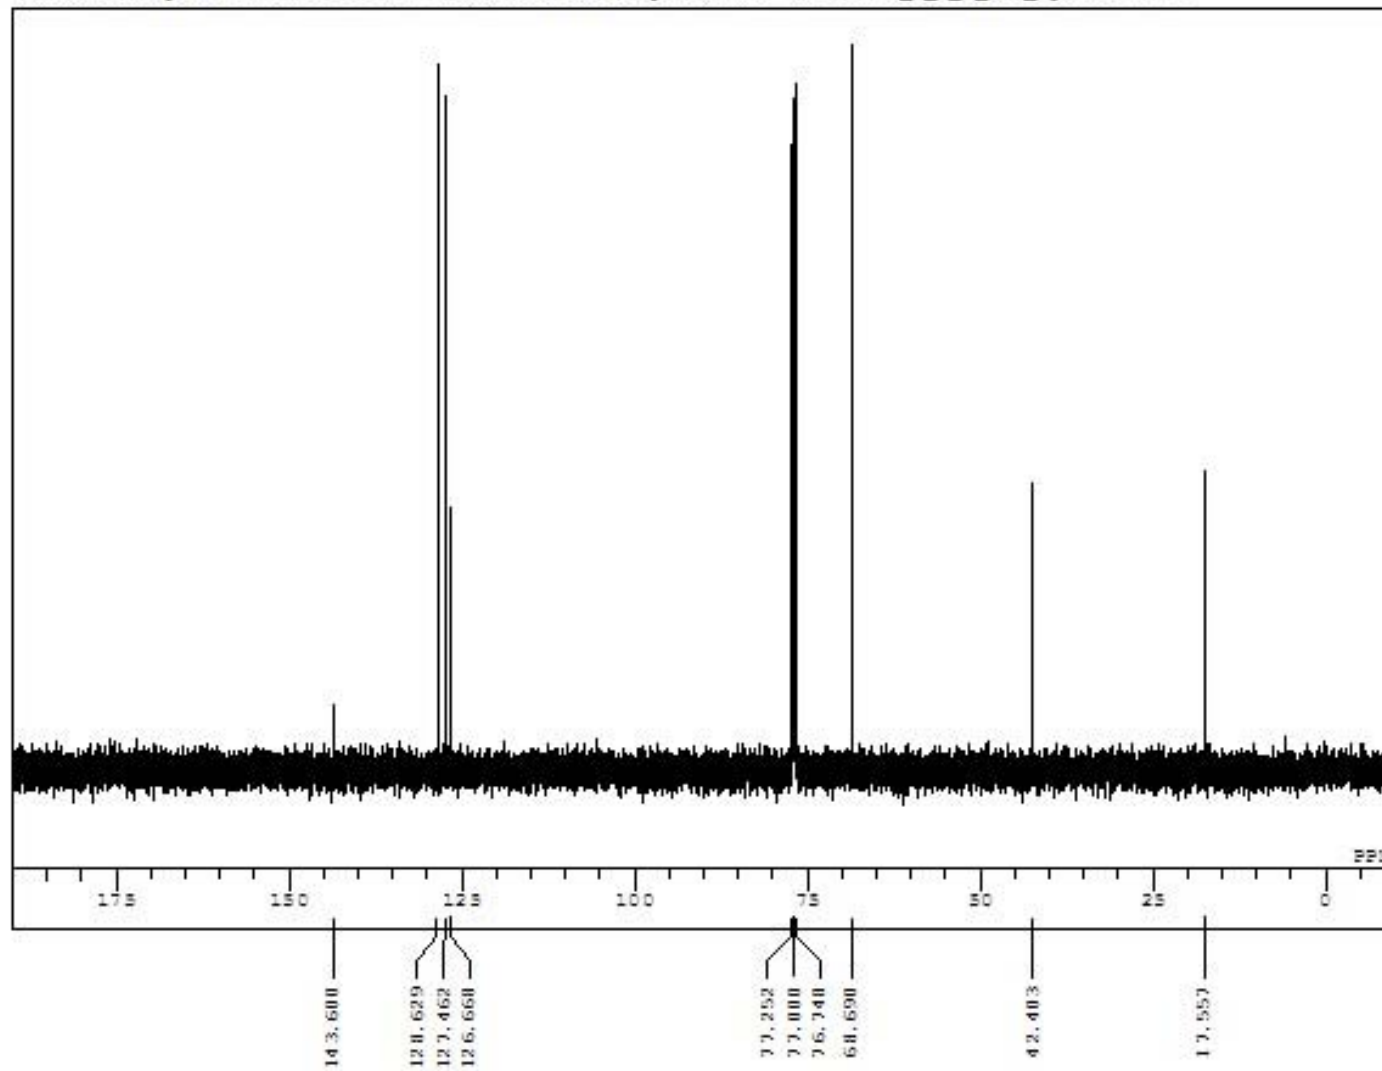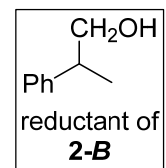

\\fso-c08\oegchan-lab2\TeamG\17\ZODI-4-22E23\31\*xj\ZAGeff\Alice\mk\_a\_1\_4\_ld\_spectrum2.aia

```

DFILE mk_a_1_4_ld_spectrum2.aia
COMENT Single Pulse Experiment
DATIM 2012-03-02 16:47:37
OBNUC 1H
EXMDD single_pulse.exp
OBFRQ 500.16 MHz
OBSET 2.41 kHz
OBFIN 6.01 Hz
POINT 16384
FREQU 10010.01 Hz
SCANS 16
AQTM 1.6368 sec
PD 4.0000 sec
PW1 7.00 usec
IRNUC
OTEMP 16.6 c
SLVNT CDCL3
EXREF 0.00 ppm
BF 0.12 Hz
RGAIN 18
    
```

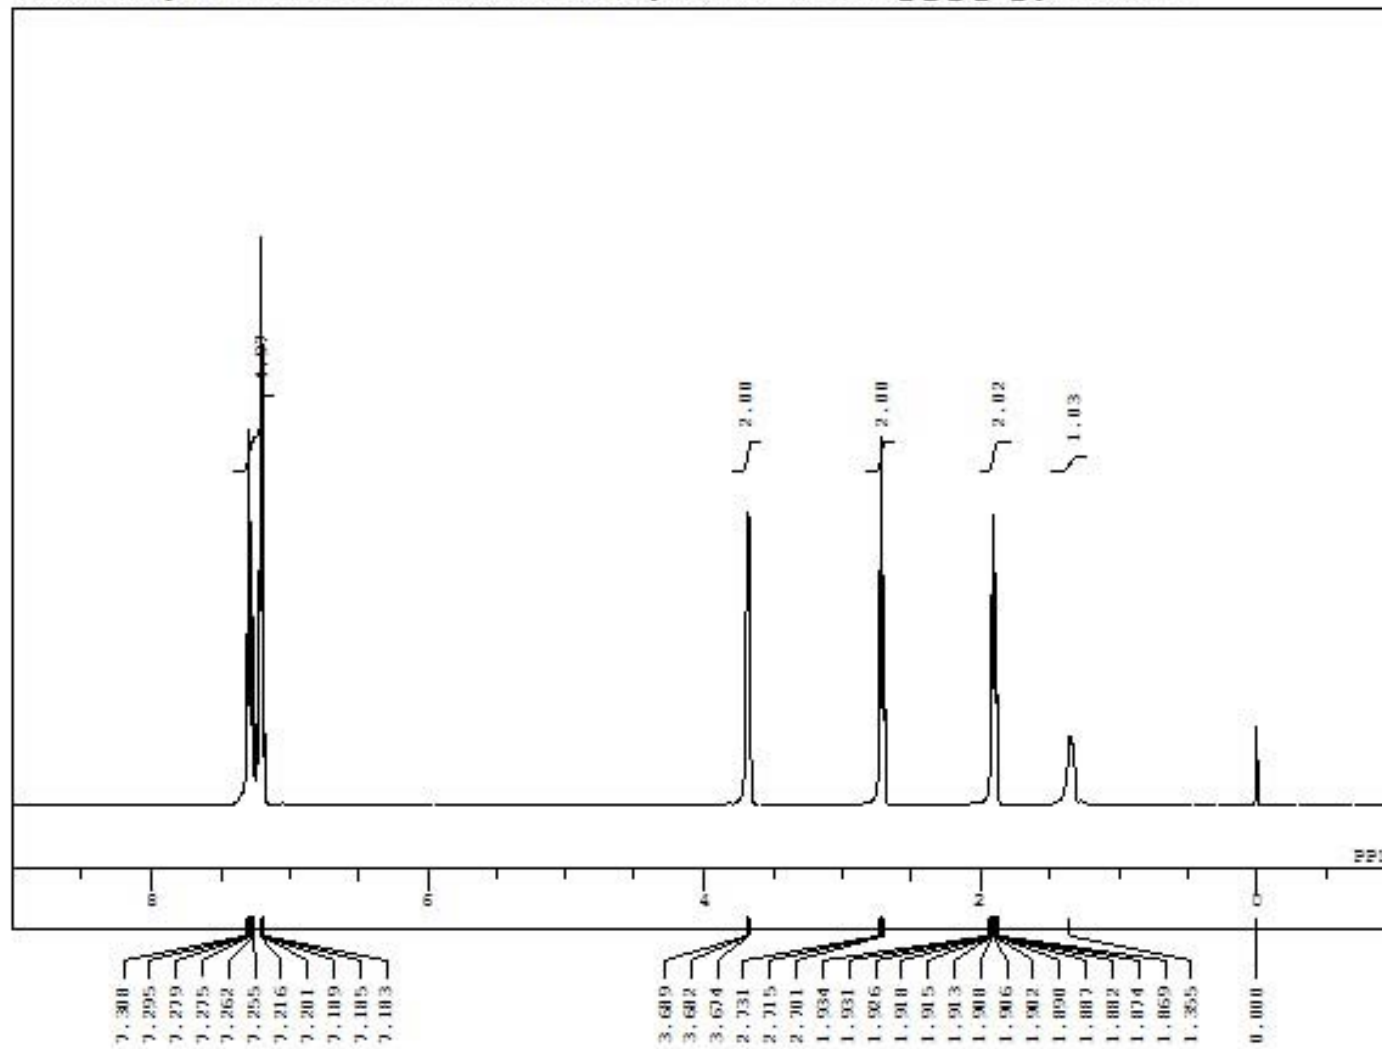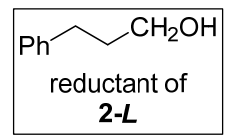

\\fso-c08\orgchem-lab2\TeamG\17\ZODI-4-22E23\01\*xj\ZAGzff(f^)\Alice\mk\_a\_1\_4\_13c\_spectrum.ala

DFILE mk\_a\_1\_4\_13c\_spectrum.ala  
COMNT Single Pulse with Broadband  
DATIM 2012-03-02 17:49:40  
OBNUC 13C  
EXMDD single\_pulse\_dec  
OBFRQ 125.77 MHz  
OBSET 7.87 kHz  
OBFIN 4.21 Hz  
POINT 32768  
FREQU 31446.54 Hz  
SCANS 1800  
ACQTM 1.0420 sec  
PD 1.0000 sec  
PW1 4.47 usec  
IRNUC 1H  
OTEMP 18.3 c  
SLVMT CDCL3  
EXREF 77.00 ppm  
BF 0.12 Hz  
RGAIN 28

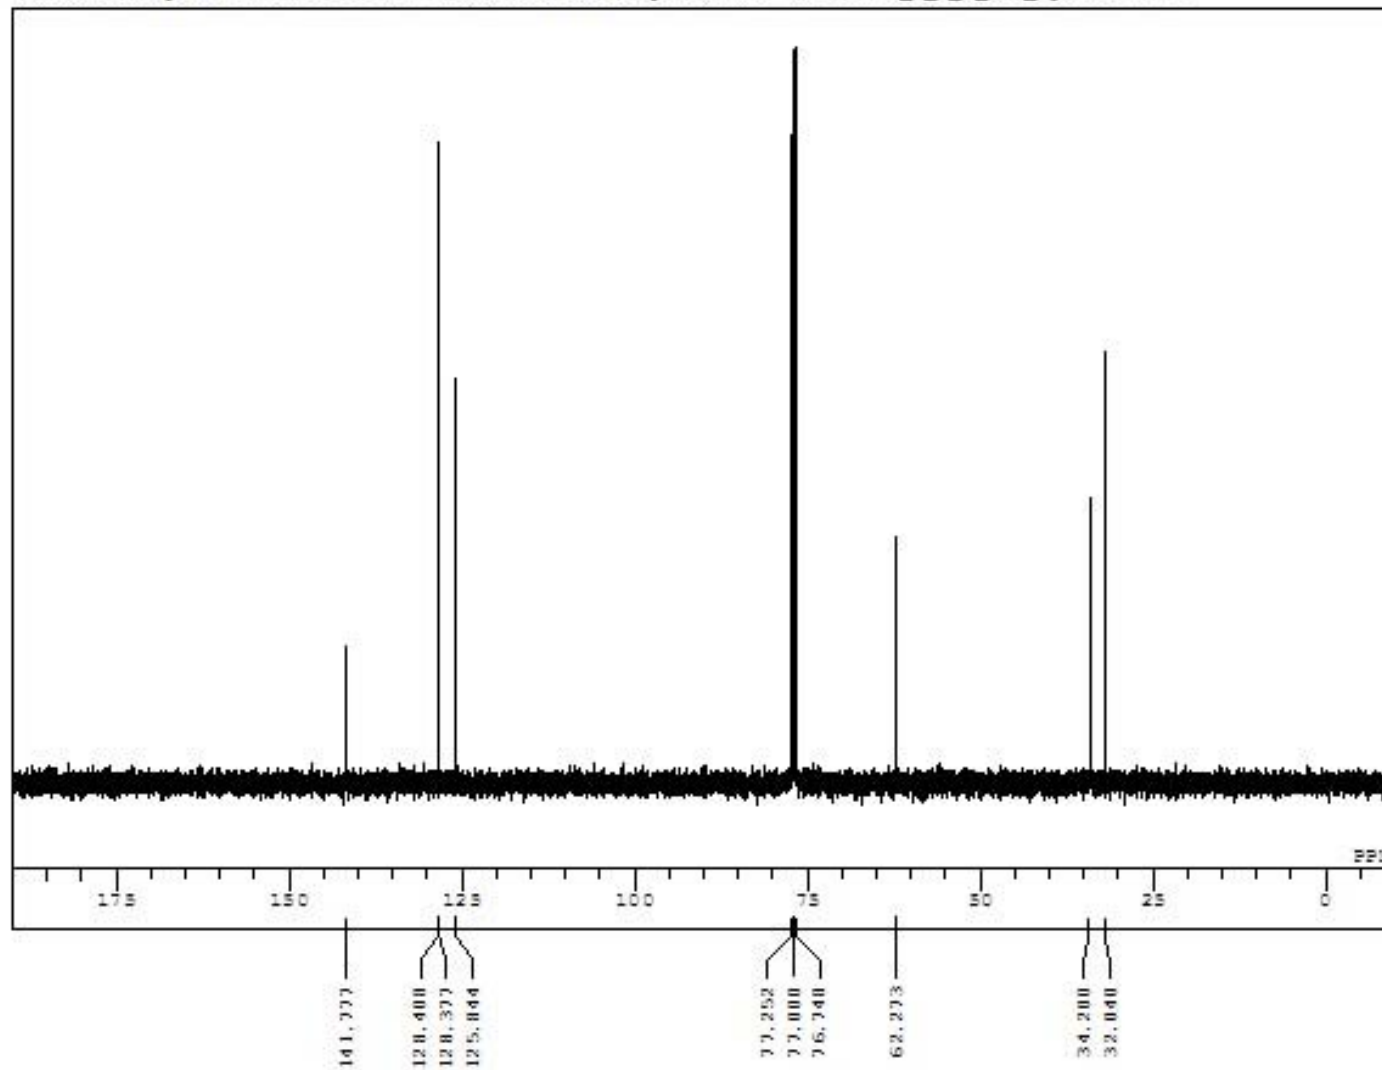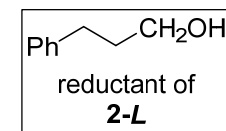

\\fao-c08\oegchan-lab2\TeamG\17\ZODI-4-22E23\31\*x\ZAGzff\Alice\mk\_a\_4\_3\_1d\_spectrum.als

```

DFILE mk_a_4_3_1d_spectrum.als
COMNT Single Pulse Experiment
DATIM 2011-05-27 00:42:52
OBNUC 1H
EXMDD single_pulse.exp
OBFRQ 500.16 MHz
OBSET 2.41 kHz
OBFIN 6.01 Hz
POINT 16384
FREQU 10010.01 Hz
SCANS 16
AQTM 1.6368 sec
PD 4.0000 sec
FW 7.00 usec
IRNUC
OTEMP 19.5 c
SLVNT CDCL3
EXREF 7.26 ppm
BF 0.12 Hz
RGAIN 17
    
```

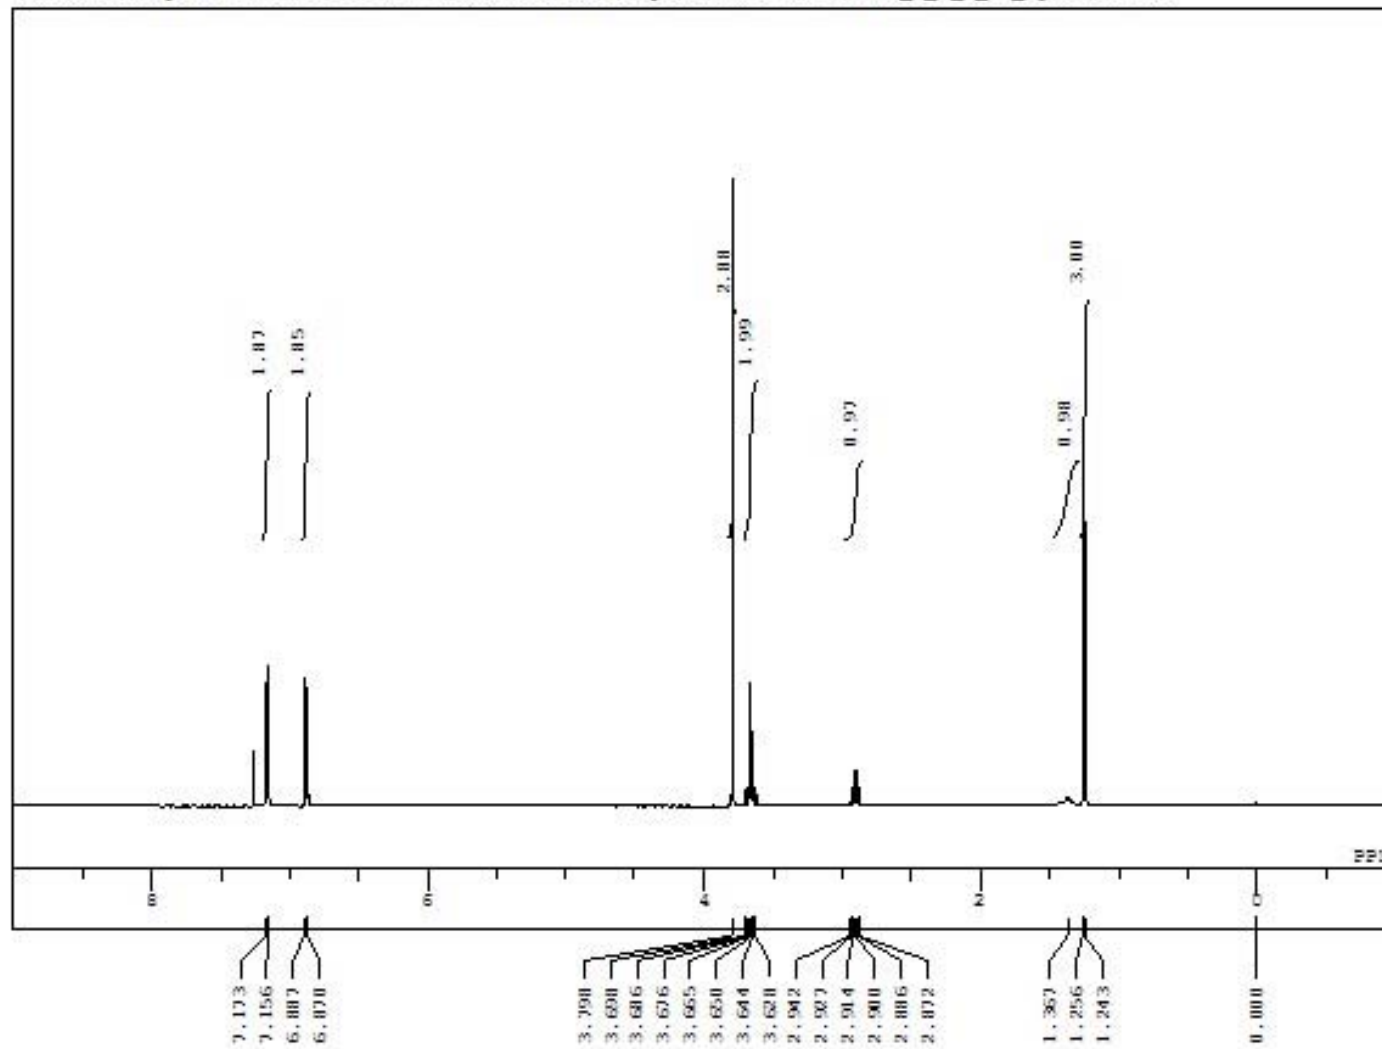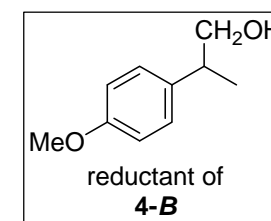

\\Fao-c08\orgchem-lab2\TeamG\ (17) ZODI-4-2ZE23\N\*xj\ZAZzff\j^Alice\mk\_s\_4\_3\_13c\_spectrum.als

DFILE mk\_s\_4\_3\_13c\_spectrum.als  
COMMT Single Pulse with Broadband  
DATIM 2011-05-27 00:51:29  
CENUC 13C  
EXMOD single\_pulse\_dec  
OBFRQ 125.77 MHz  
OBSET 7.87 KHz  
OBFIN 4.21 Hz  
POINT 32768  
FREQU 31446.54 Hz  
SCANS 200  
AQTM 1.0420 sec  
PD 1.0000 sec  
FWL 4.47 usec  
IRNUC 1H  
CTEMP 20.6 c  
SLVNT CDCL3  
EKREF 77.00 ppm  
BF 0.12 Hz  
RGAIN 30

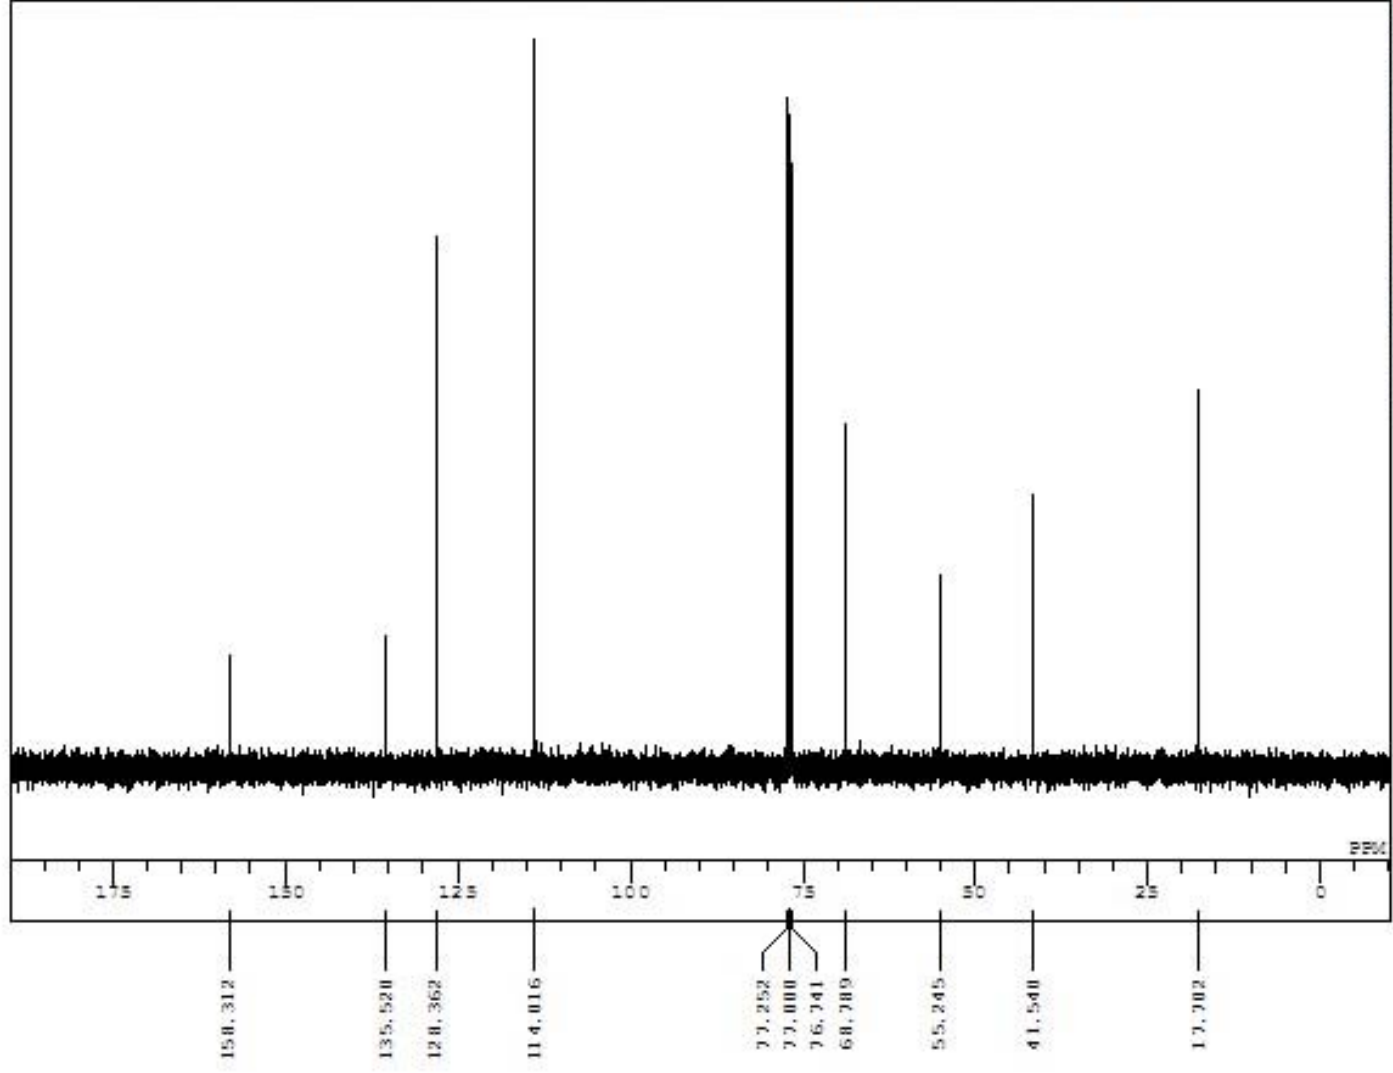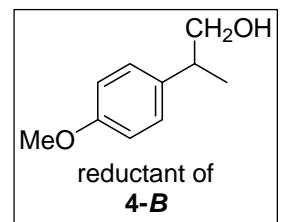

\\fao-c08\o-gchem-lab2\TeamG\17\ZODI-4-22E23\31\*xj\ZAZzff\Alice\mk\_a\_4\_4\_ld\_spectrum.als

```

DFILE mk_a_4_4_ld_spectrum.als
COMENT Single Pulse Experiment
DATIM 2011-05-27 10:49:12
OBNUC 1H
EXMDD single_pulse.exp
OBFRQ 500.16 MHz
OBSET 2.41 kHz
OBFIM 6.01 Hz
POINT 16384
FREQU 10010.01 Hz
SCANS 16
AQTM 1.6368 sec
PD 4.0000 sec
PW1 7.00 usec
IRNUC
OTEMP 19.2 c
SLVNT CDCL3
EXREF 7.26 ppm
BF 0.12 Hz
RGAIN 18
    
```

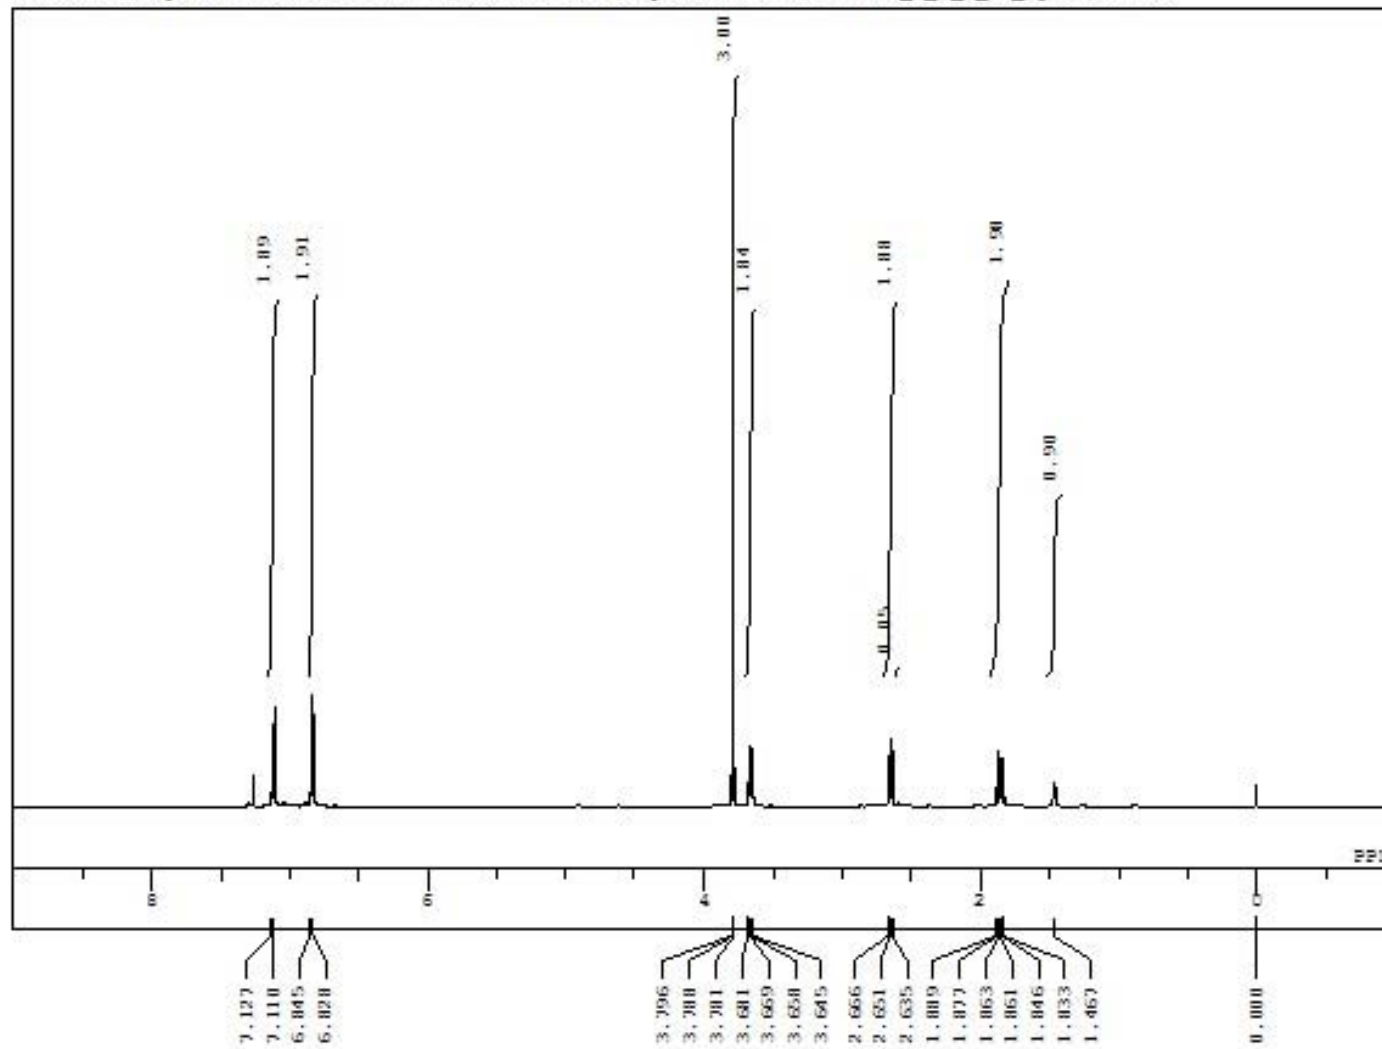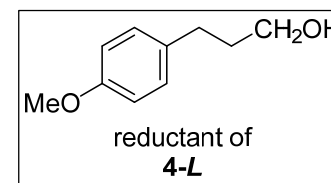



\\fso-c08\orgchem-lab2\TeamG\17\ZODI-4-22E23\01\*xj\ZAGzff(f^\Alice\mk\_a\_4\_4\_13c\_spectrum.ala

DFILE mk\_a\_4\_4\_13c\_spectrum.ala  
COMNT Single Pulse with Broadband  
DATIM 2011-05-27 12:00:55  
OBNUC 13C  
EXMDD single\_pulse\_dec  
OBFRQ 125.77 MHz  
OBSET 7.87 KHz  
OBFIN 4.21 Hz  
POINT 32768  
FREQU 31446.54 Hz  
SCANS 2048  
ACQTM 1.0420 sec  
PD 1.0000 sec  
FW1 4.47 usec  
IRNUC 1H  
OTEMP 20.4 c  
SLVMT CDCL3  
EXREF 77.00 ppm  
BF 0.12 Hz  
RGAIN 28

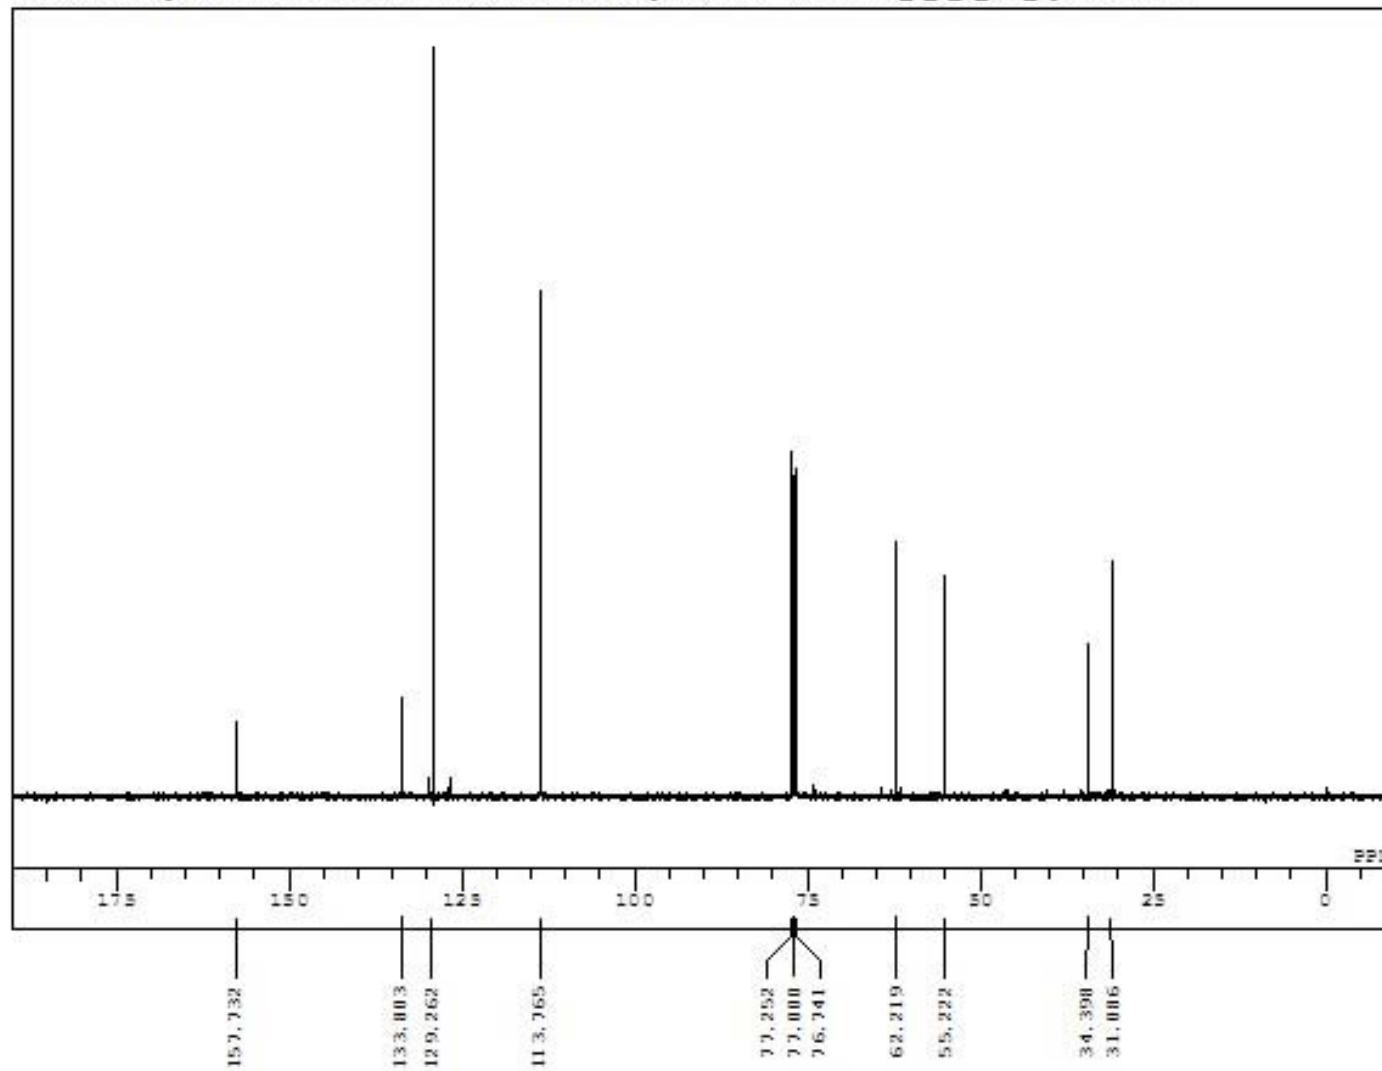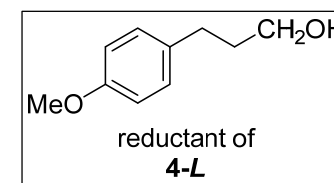

\\fso-c08\o-gchem-lab2\TeamG\17\ZODI-4-22E23\31\*xj\ZAGzff\Alice\mk\_e\_5\_3\_1d\_spectrum.als

```

DFILE mk_e_5_3_1d_spectrum.als
COMENT Single Pulse Experiment
DATIM 2011-06-03 10:58:07
OBNUC 1H
EXMDD single_pulse.exp
OBFRQ 500.16 MHz
OBSET 2.41 kHz
OBFIN 6.01 Hz
POINT 16384
FREQU 10010.01 Hz
SCANS 16
ACQTM 1.6368 sec
PD 4.0000 sec
FW1 7.00 usec
IRNUC
OTEMP 19.4 c
SLVNT CDCL3
EXREF 0.00 ppm
BF 0.12 Hz
RGAIN 18
    
```

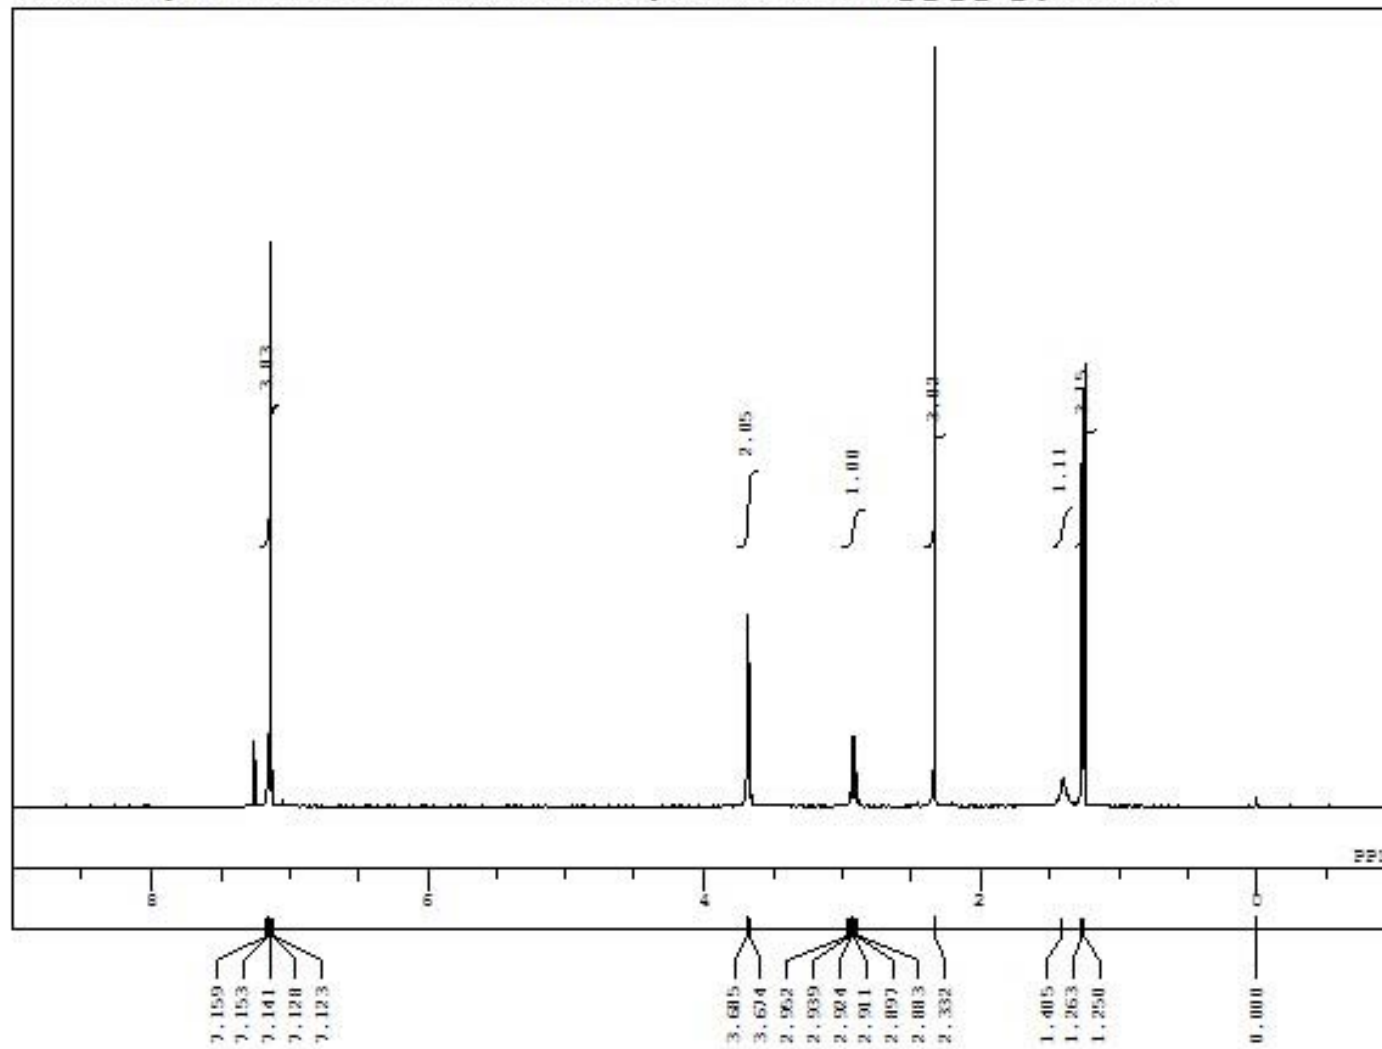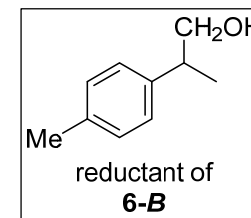

\\Fao-c08\orgchem-lab2\Team27\ (17) ZODI-4-22E23"NJ\ZAGzfs(f^)\Alice\mk\_s\_1\_4\_1d\_spectrum.als

DFILE mk\_s\_1\_4\_1d\_spectrum.als  
COMMT Single Pulse with Broadband  
DATIM 2011-08-05 10:12:59  
CENUC 13C  
EXMOD single\_pulse\_dec  
OBFRQ 125.77 MHz  
OBSET 7.87 KHz  
OBFIN 4.21 Hz  
POINT 32768  
FREQU 31446.54 Hz  
SCANS 1800  
AQTM 1.0420 sec  
PD 1.0000 sec  
FWL 4.47 usec  
IRNUC 1H  
CTEMP 22.8 c  
SLVNT CDCL3  
EXREF 77.00 ppm  
BF 0.12 Hz  
RGAIN 30

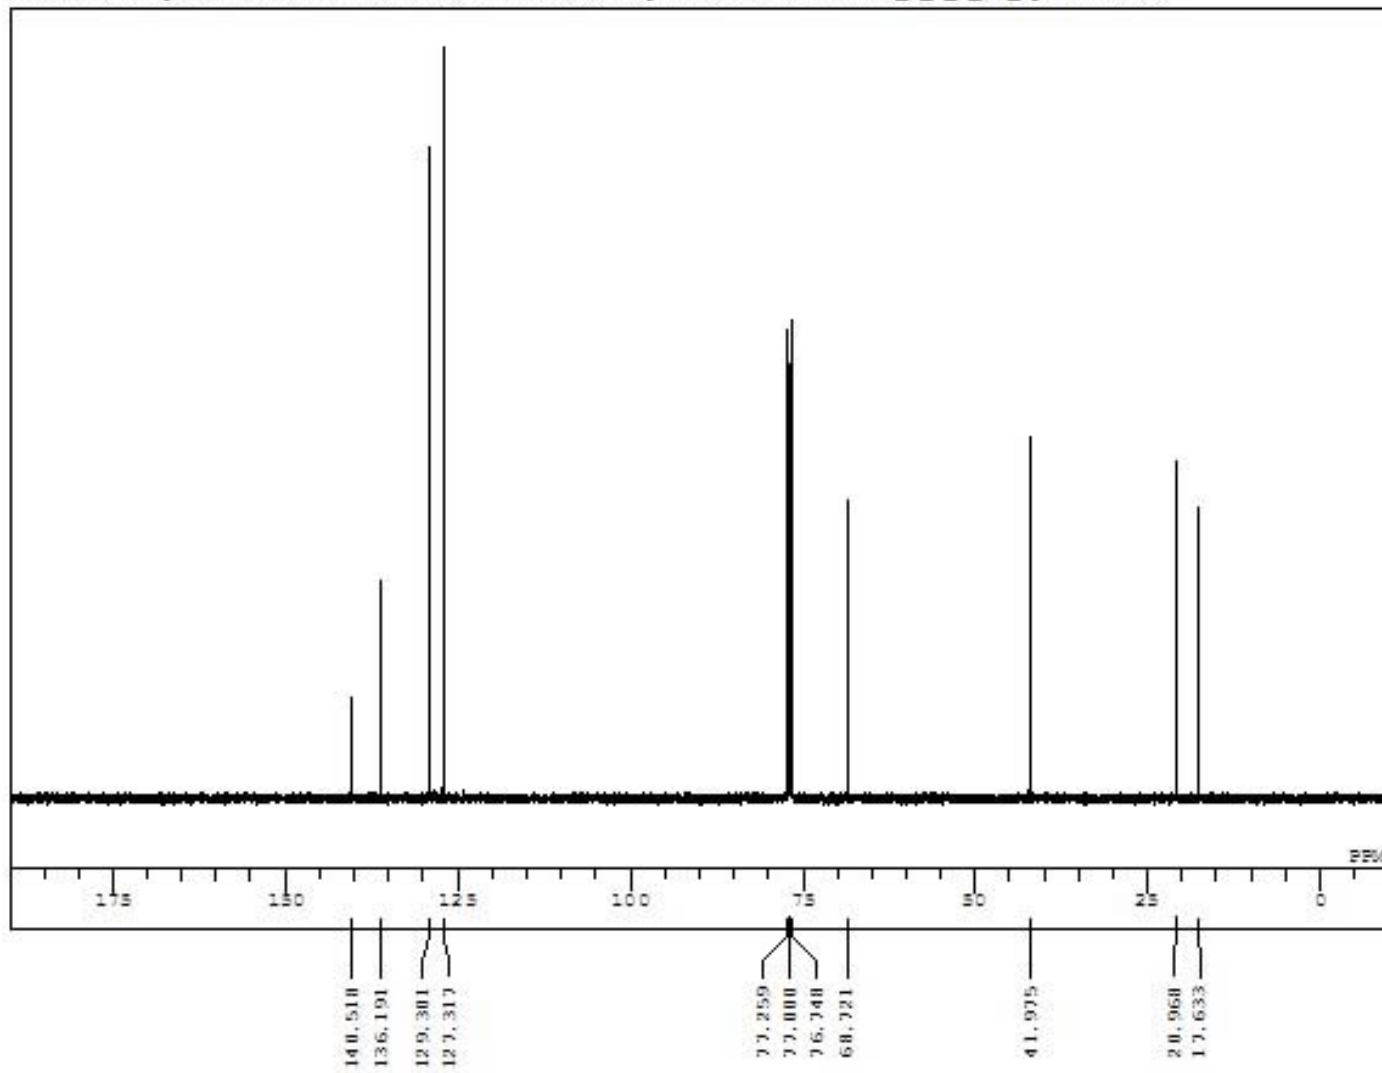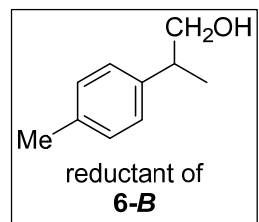

\\fso-c08\orgchem-lab2\TeamG\17\ZODI-4-22E23\31\*xj\ZAGzff\Alice\mk\_a\_5\_4\_1d\_spectrum.als

DFILE mk\_a\_5\_4\_1d\_spectrum.als  
COMNT Single Pulse Experiment  
DATIM 2011-05-27 20:27:18  
OBNUC 1H  
EXMDD single\_pulse.exp  
OBFRQ 500.16 MHz  
OBSET 2.41 KHz  
OBFIN 6.01 Hz  
POINT 16384  
FREQU 10010.01 Hz  
SCANS 16  
ACQTM 1.6368 sec  
PD 4.0000 sec  
PW1 7.00 usec  
IRNUC  
OTEMP 19.0 c  
SLVMT CDCL3  
EXREF 0.00 ppm  
BF 0.12 Hz  
RGAIN 16

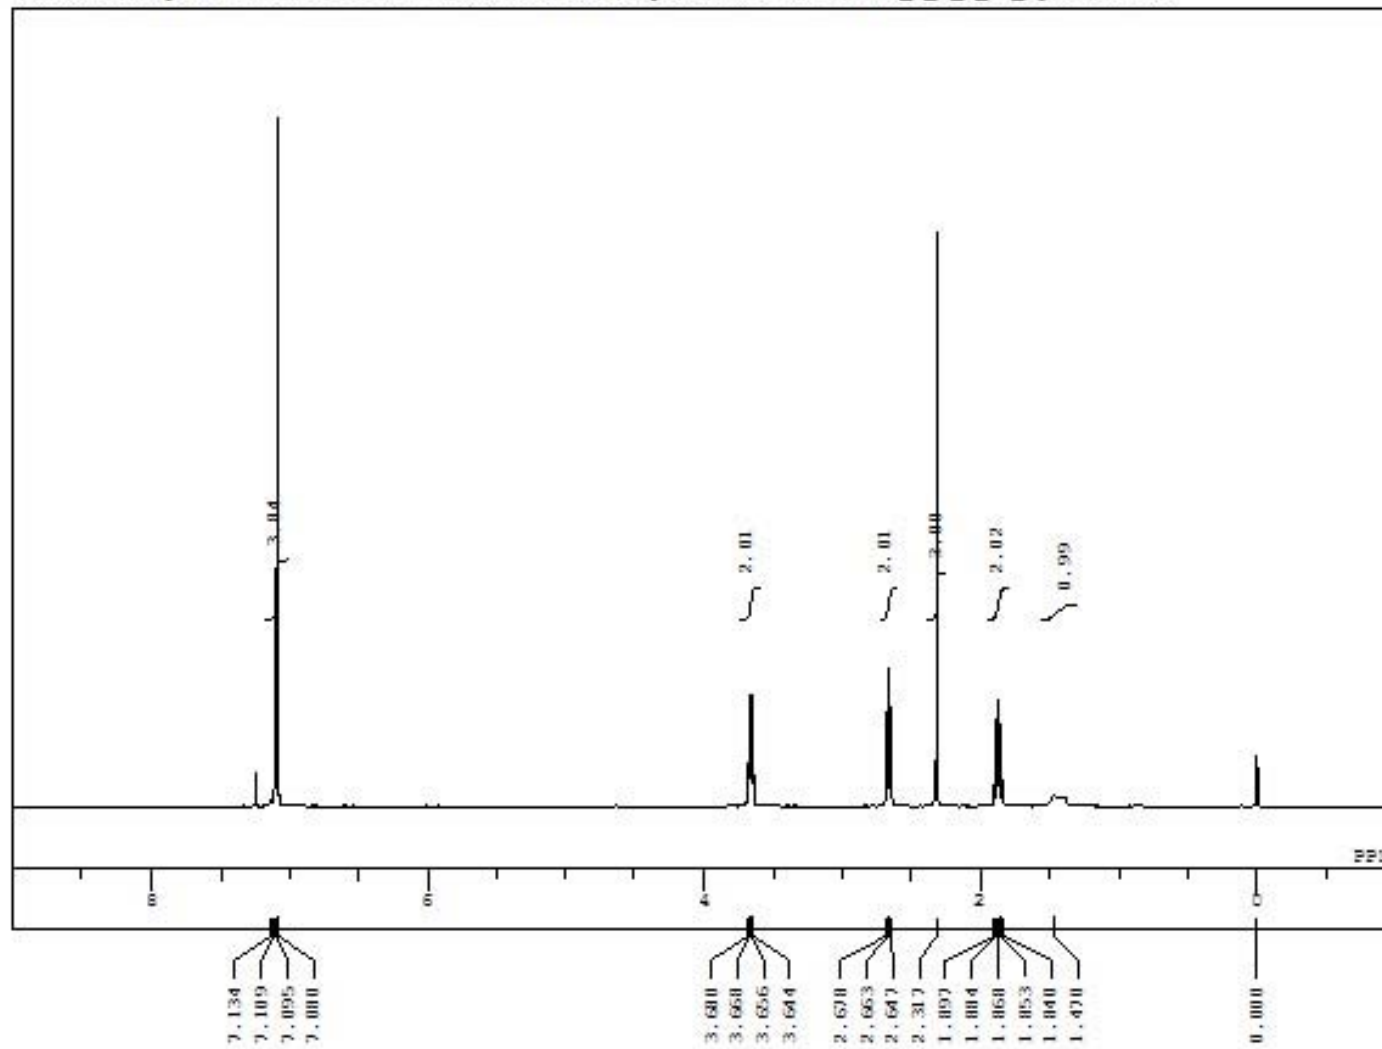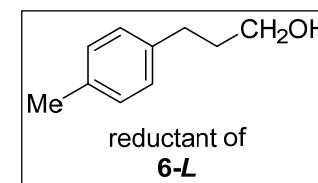

\\Fao-c08\orgchem-lab2\Team2\ (17) ZODI-4-22E23\N\*xj\ZAZzff\Alice\mk\_s\_4\_13c\_spectrum.als

DFILE mk\_s\_4\_13c\_spectrum.als  
COMMT Single Pulse with Broadband  
DATIM 2011-05-27 21:38:30  
CENUC 13C  
EXMOD single\_pulse\_dec  
OBFRQ 125.77 MHz  
OBSET 7.87 KHz  
OBFIN 4.21 Hz  
POINT 32768  
FREQU 31446.54 Hz  
SCANS 2048  
AQTM 1.0420 sec  
PD 1.0000 sec  
FWL 4.47 usec  
IRNUC 1H  
CTEMP 20.7 c  
SOLVENT CDCL3  
EXREF 77.00 ppm  
BF 0.12 Hz  
RGAIN 28

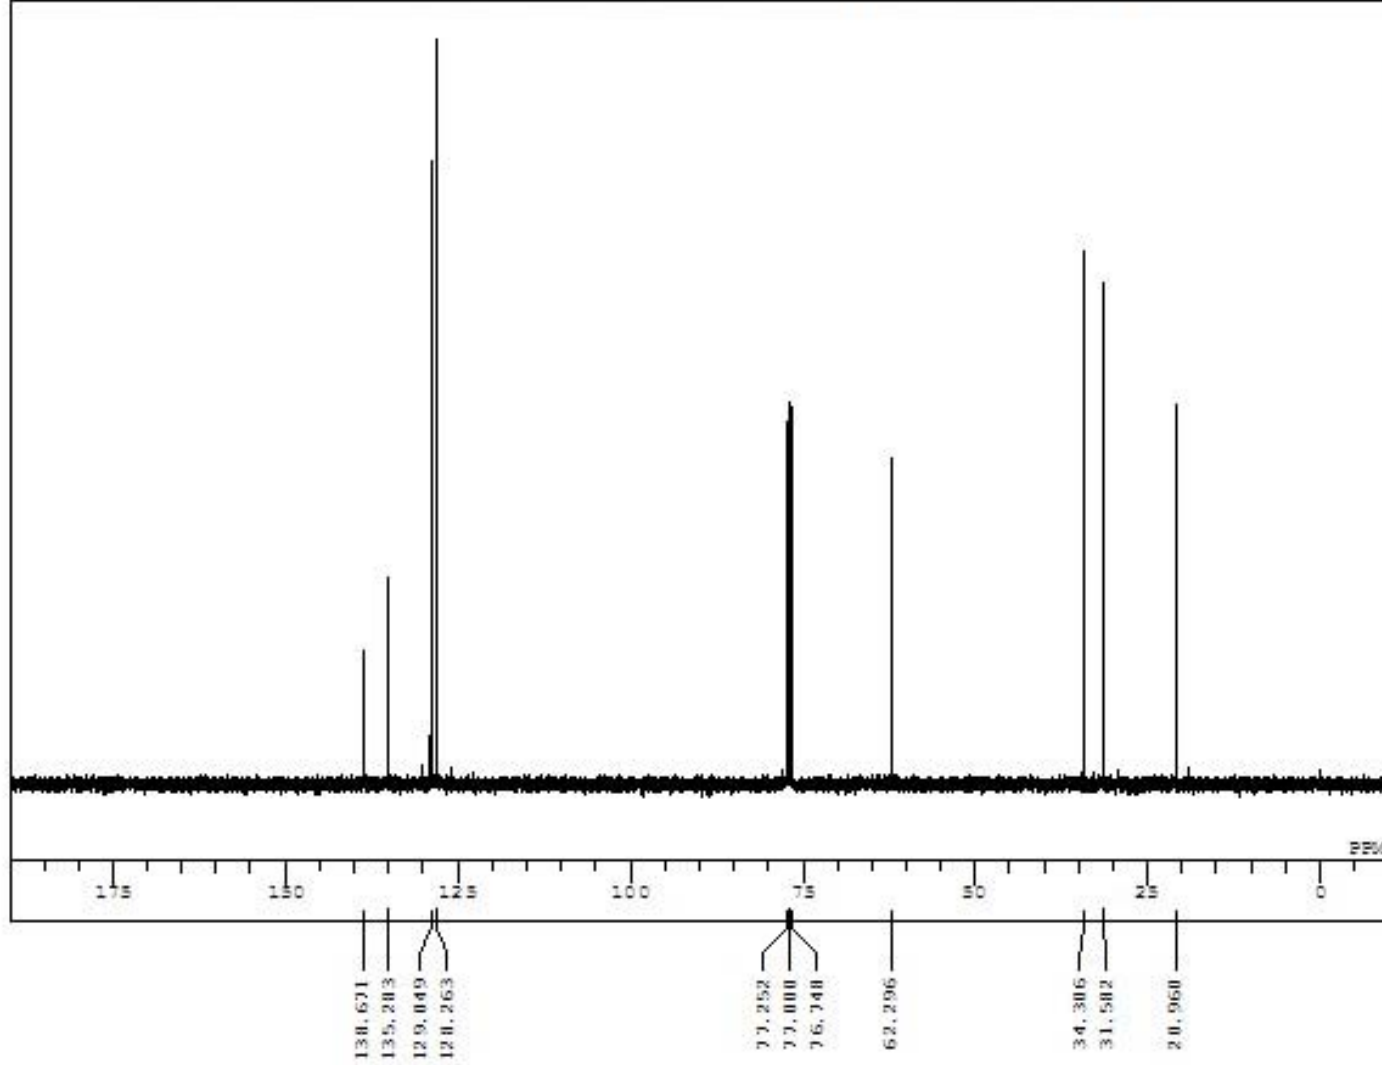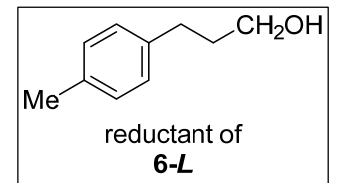

\\fao-c08\oegchem-lab2\TeamG\17\ZODI-4-22E23\31\*xj\ZAGzff\Alice\mk\_a\_6\_3\_1d\_spectrum.als

```

DFILE mk_a_6_3_1d_spectrum.als
COMNT Single Pulse Experiment
DATIM 2011-08-05 11:18:37
OBNUC 1H
EXMDD single_pulse.exp
OBFRQ 500.16 MHz
OBSET 2.41 KHz
OBFIN 6.01 Hz
POINT 16384
FREQU 10010.01 Hz
SCANS 16
AQTM 1.6368 sec
PD 4.0000 sec
FW1 7.00 usec
IRNUC 1H
OTEMP 21.6 c
SLVNT CDCL3
EXREF 0.00 ppm
BF 0.12 Hz
RGAIN 16
    
```

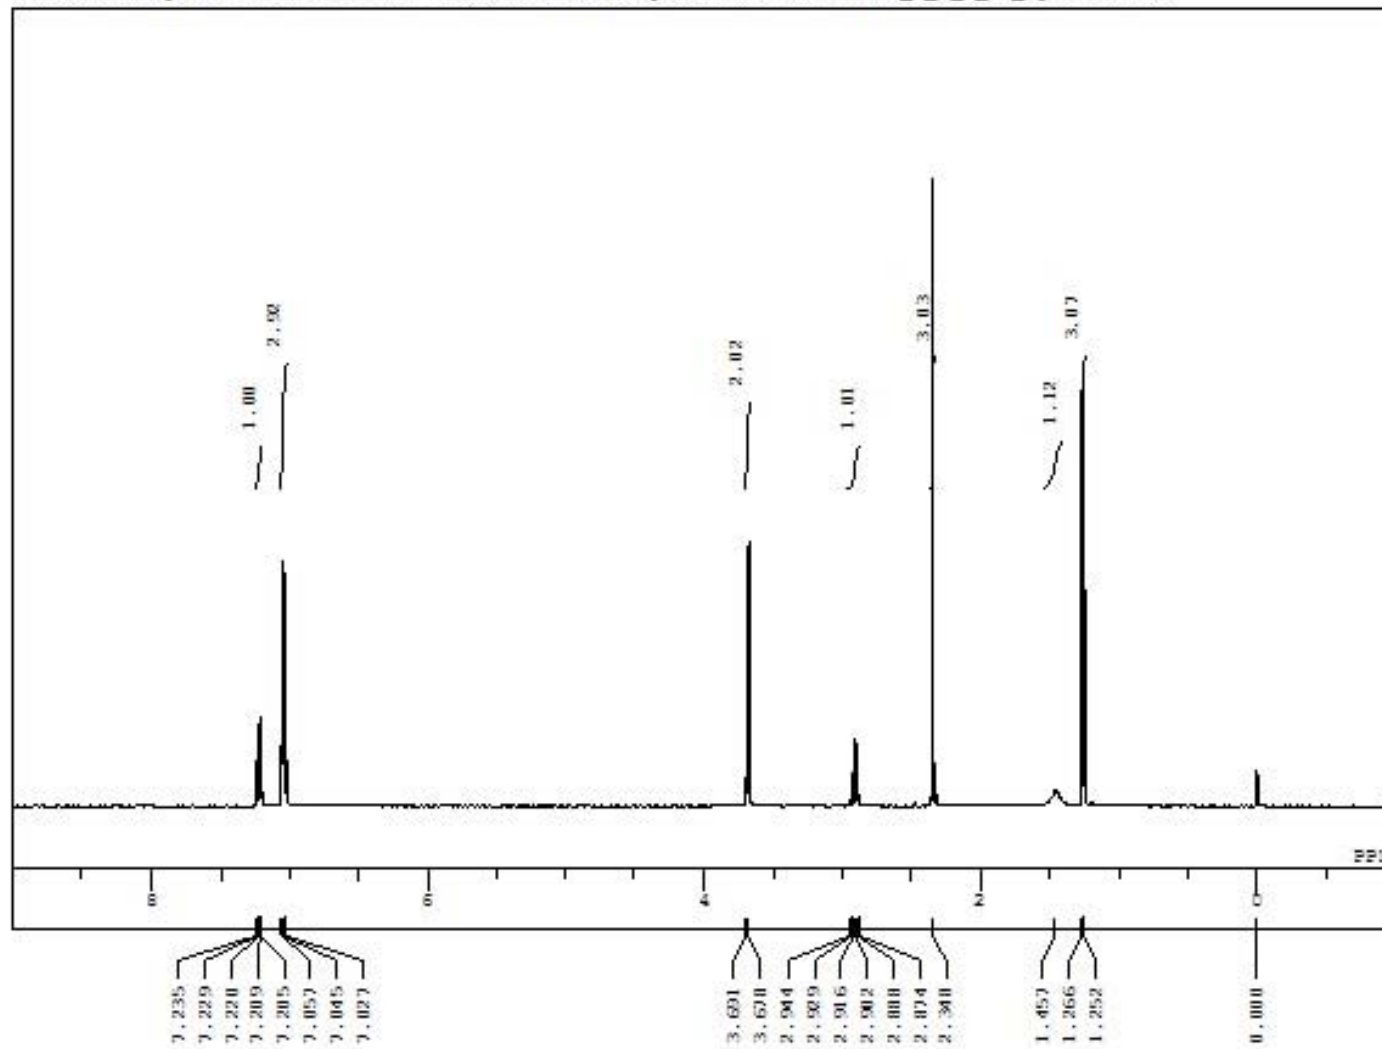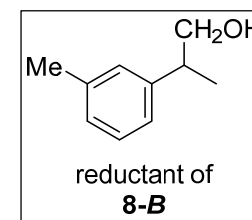

\\fso-c08\orgchem-lab2\TeamG\17\ZODI-H-22E23\01\*xj\ZAGzff(f^\Alice\mk\_a\_6\_3\_13c\_spectrum.ala

DFILE mk\_a\_6\_3\_13c\_spectrum.ala  
COMNT Single Pulse with Broadband  
DATIM 2011-08-05 12:27:50  
OBNUC 13C  
EXMDD single\_pulse\_dec  
OBFRQ 125.77 MHz  
OBSET 7.87 KHz  
OBFIN 4.21 Hz  
POINT 32768  
FREQU 31446.54 Hz  
SCANS 2000  
ACQTM 1.0420 sec  
PD 1.0000 sec  
FW1 4.47 usec  
IRNUC 1H  
OTEMP 23.0 c  
SLVMT CDCL3  
EXREF 77.00 ppm  
BF 0.12 Hz  
RGAIN 28

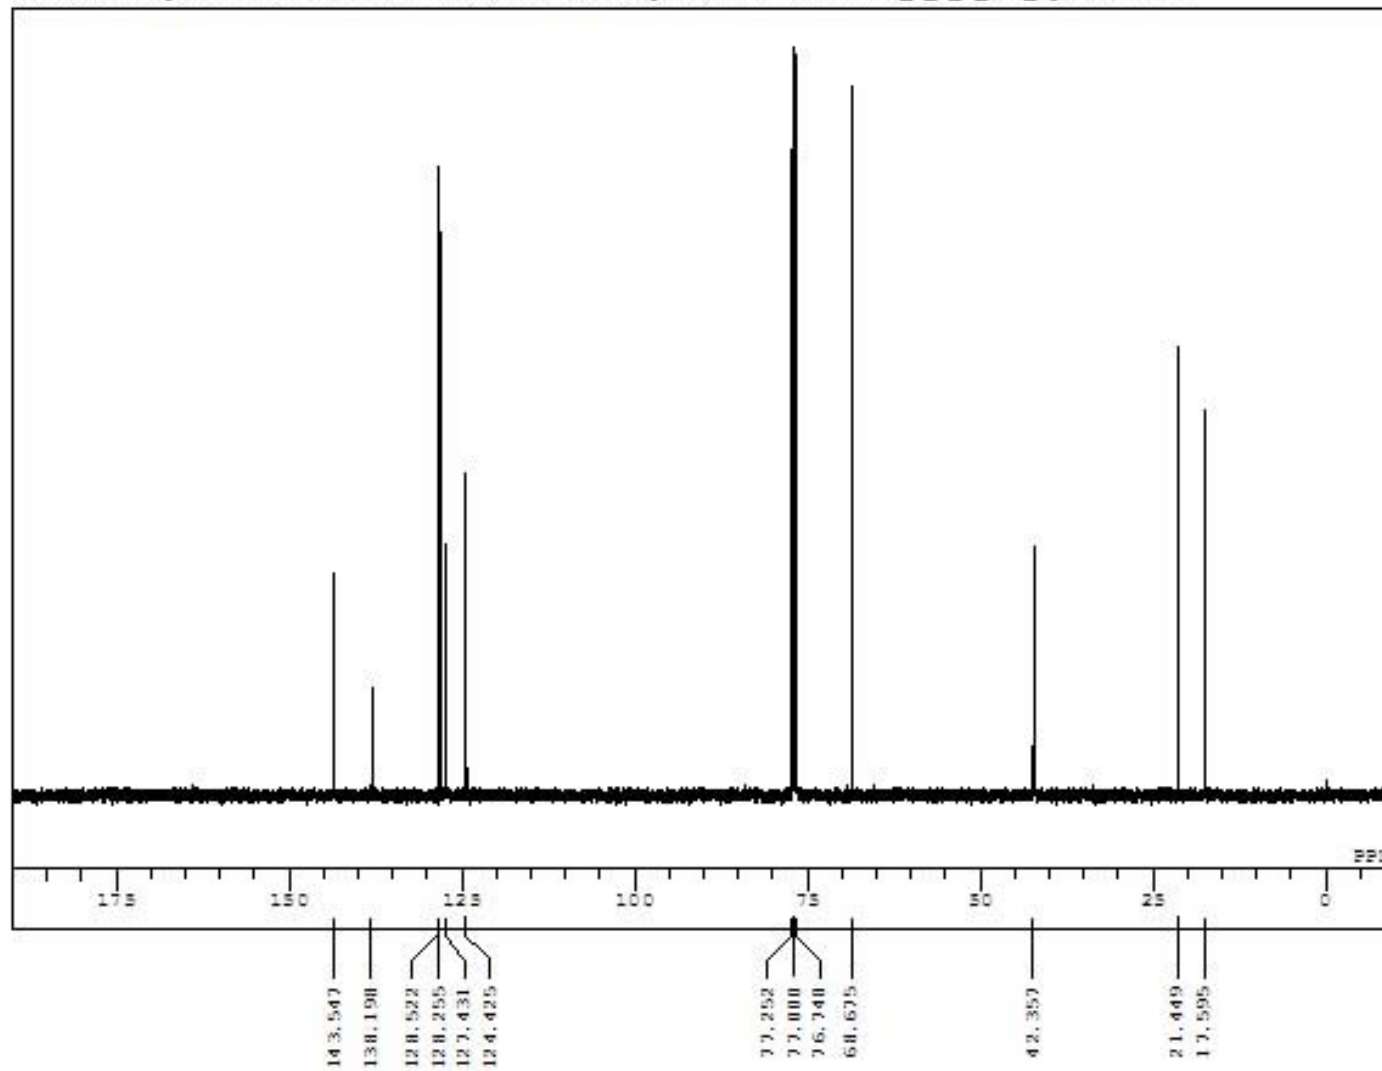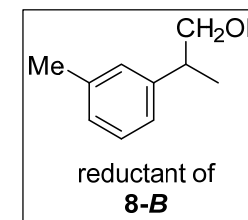

\\fso-c08\o-gchem-lab2\TeamG\17\ZODI-4-22E23\31\*xj\SAGEff\Alice\mk\_a\_6\_4\_1d\_spectrum.als

```

DFILE mk_a_6_4_1d_spectrum.als
COMNT Single Pulse Experiment
DATIM 2011-08-05 01:26:38
OBNUC 1H
EXMDD single_pulse.exp
OBFRQ 500.16 MHz
OBSET 2.41 kHz
OBFIN 6.01 Hz
POINT 16384
FREQU 10010.01 Hz
SCANS 16
AQTM 1.6368 sec
PD 4.0000 sec
FW1 7.00 usec
IRNUC 1H
OTEMP 20.9 c
SLVNT CDCL3
EXREF 0.00 ppm
BF 0.12 Hz
RGAIN 18
    
```

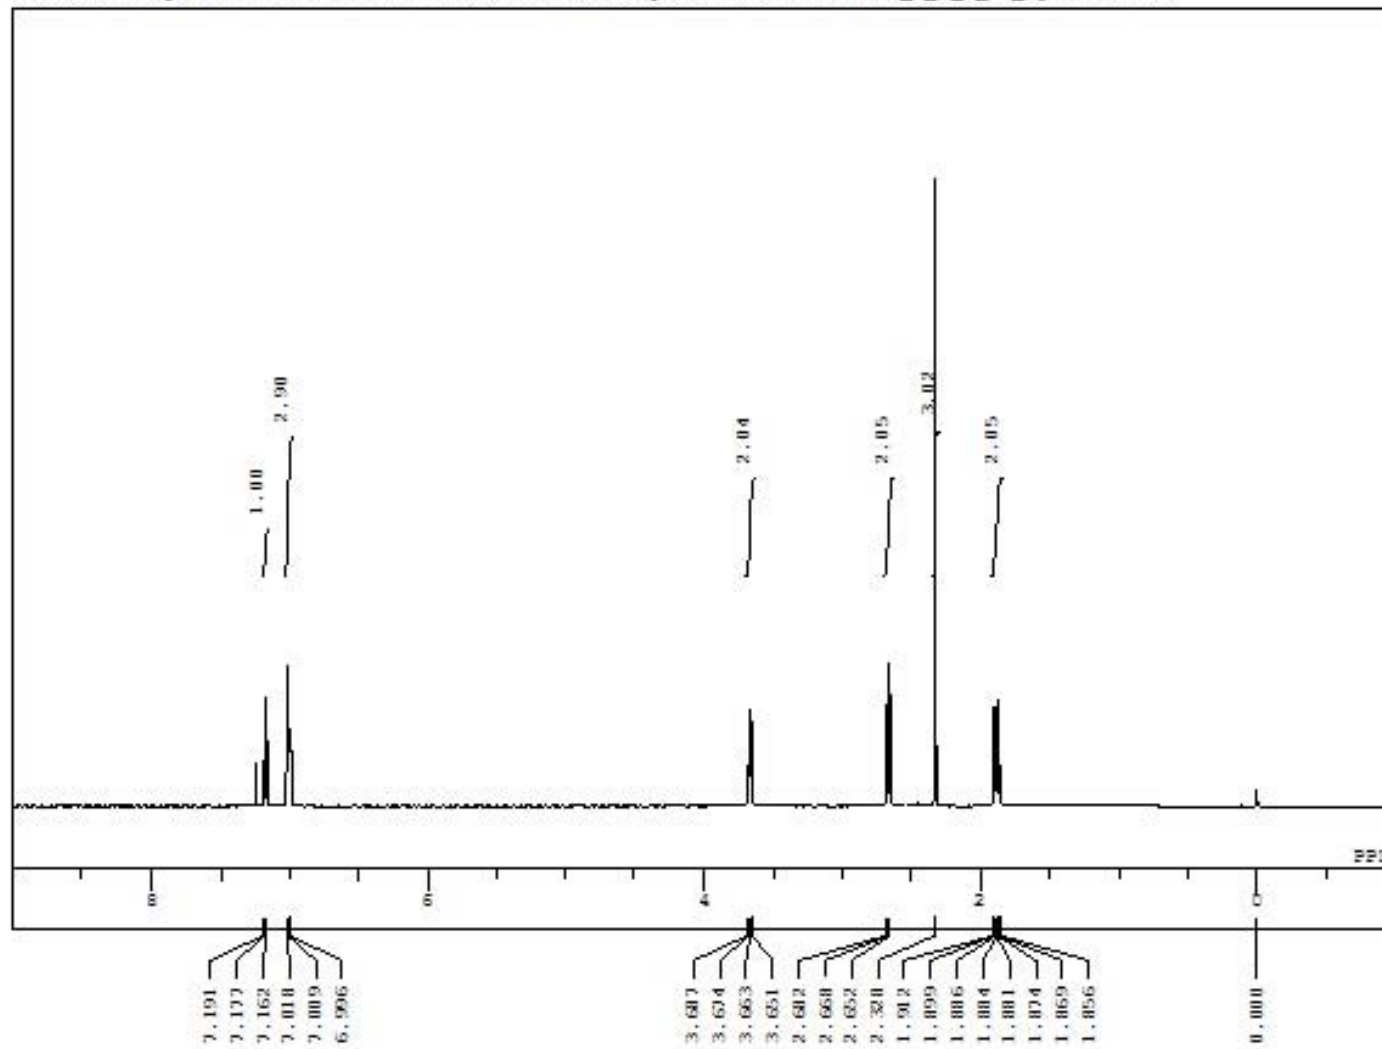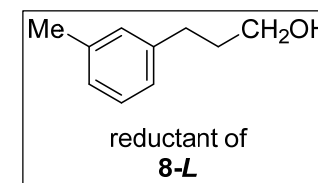



\\Fao-c08\orgchem-lab2\TeamD\ (17) ZODI-4-22E23\W\*xj\ZAZzff\j^Alice\mk\_s\_6\_4\_13c\_spectrum.als

DFILE mk\_s\_6\_4\_13c\_spectrum.als  
COMMT Single Pulse with Broadband  
DATIM 2011-08-05 02:36:32  
CENUC 13C  
EXMOD single\_pulse\_dec  
OBFRQ 125.77 MHz  
OBSET 7.87 KHz  
OBFIN 4.21 Hz  
POINT 32768  
FREQU 31446.54 Hz  
SCANS 2000  
AQTM 1.0420 sec  
PD 1.0000 sec  
FWL 4.47 usec  
IRNUC 1H  
CTEMP 22.3 c  
SLVNT CDCL3  
EKREF 77.00 ppm  
BF 0.12 Hz  
RGAIN 30

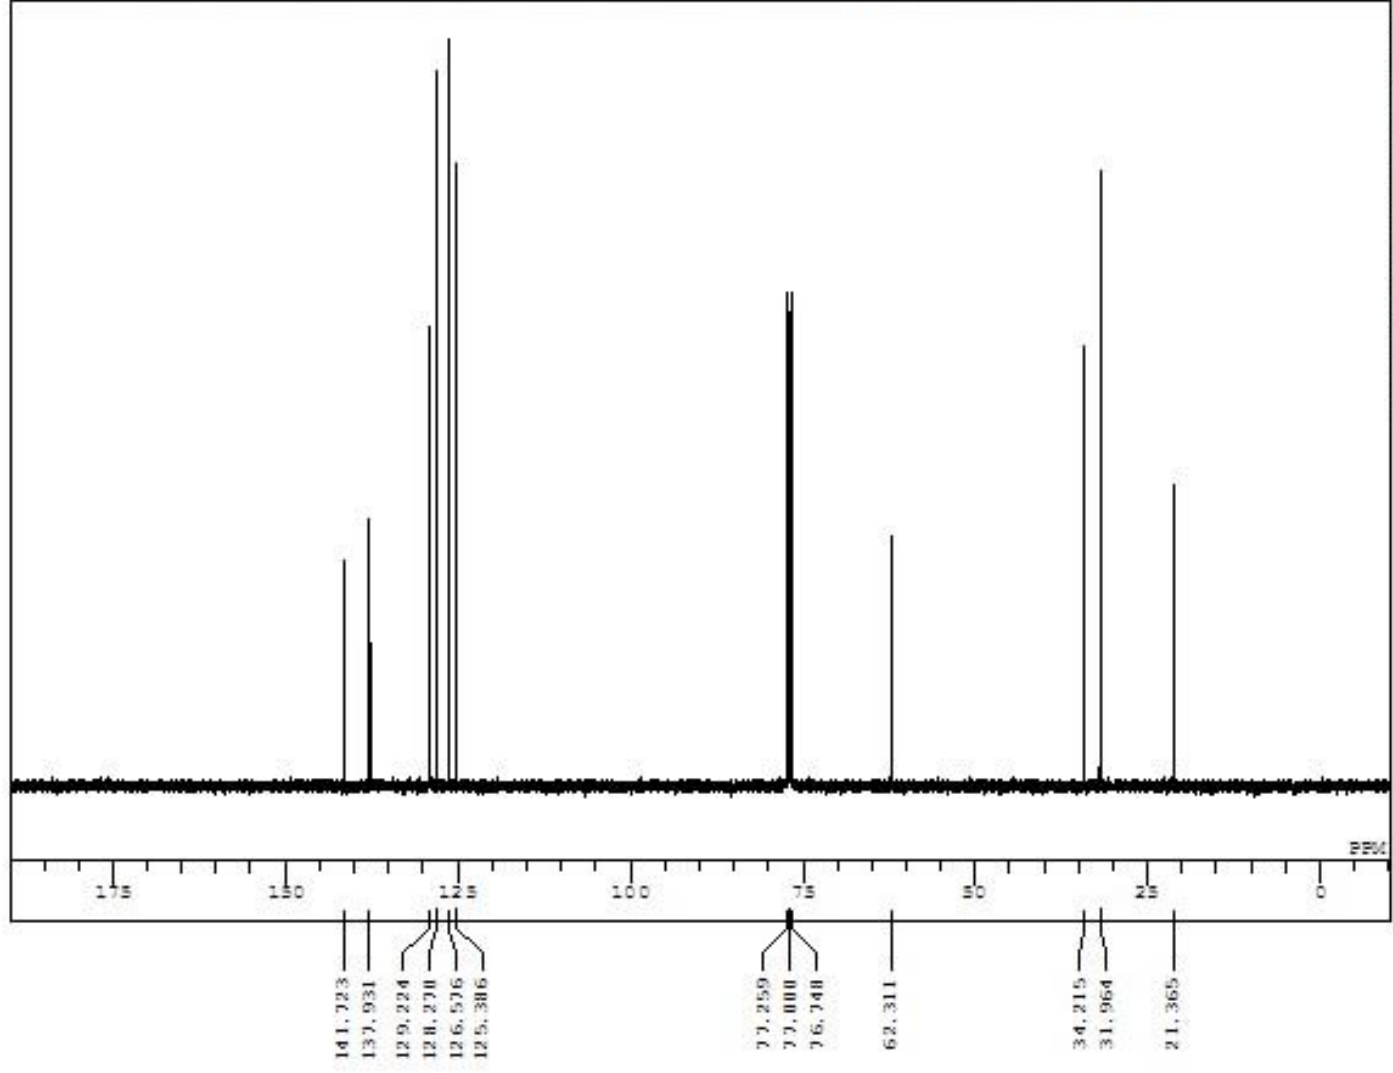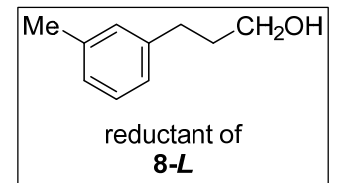

\\fso-c08\oegchan-lab2\TeamG\17\ZODI-4-22E23"N"xj\ZAGzff\Alice\mk\_a\_3\_3\_ld\_2\_spectrum.als

```

DFILE mk_a_3_3_ld_2_spectrum.als
COMNT Single Pulse Experiment
DATIM 2011-08-04 14:33:51
OBNUC 1H
EXMDD single_pulse.exp
OBFRQ 500.16 MHz
OBSET 2.41 kHz
OBFIN 6.01 Hz
POINT 16384
FREQU 10010.01 Hz
SCANS 16
AQTM 1.6368 sec
PD 4.0000 sec
FW1 7.00 usec
IRNUC
OTEMP 21.6 c
SLVNT CDCL3
EXREF 0.00 ppm
BF 0.12 Hz
RGAIN 18
    
```

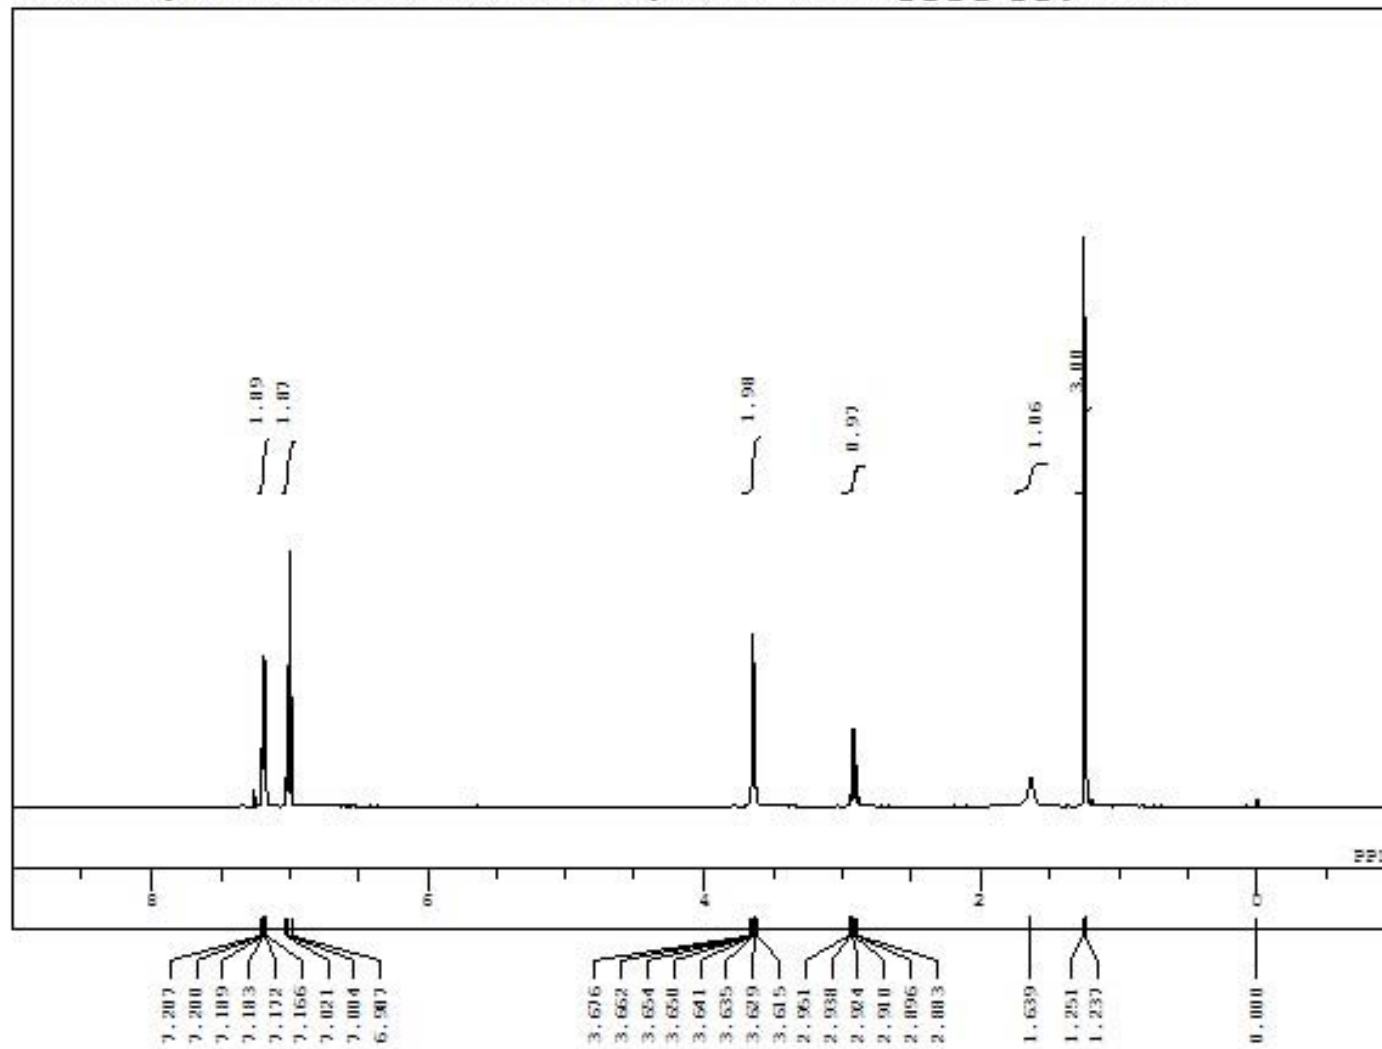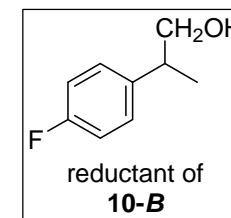

\\fso-c08\orgchem-lab2\TeamG\17\ZODI-4-22E23"N"xj\ZAGzff(f^)\Alice\mk\_a\_3\_3\_13c-2\_spectrum.als

```

DFILE mk_a_3_3_13c-2_spectrum.als
COMNT Single Pulse with Broadband
DATIM 2011-08-04 18:15:05
OBNUC 13C
EXMDD single_pulse_dec
OBFRQ 125.77 MHz
OBSET 7.87 KHz
OBFIN 4.21 Hz
POINT 32768
FREQU 31446.54 Hz
SCANS 2000
AQTM 1.0420 sec
PD 1.0000 sec
FW1 4.47 usec
IRNUC 1H
OTEMP 22.8 c
SLVMT CDCL3
EXREF 77.00 ppm
BF 0.12 Hz
RGAIN 30
    
```

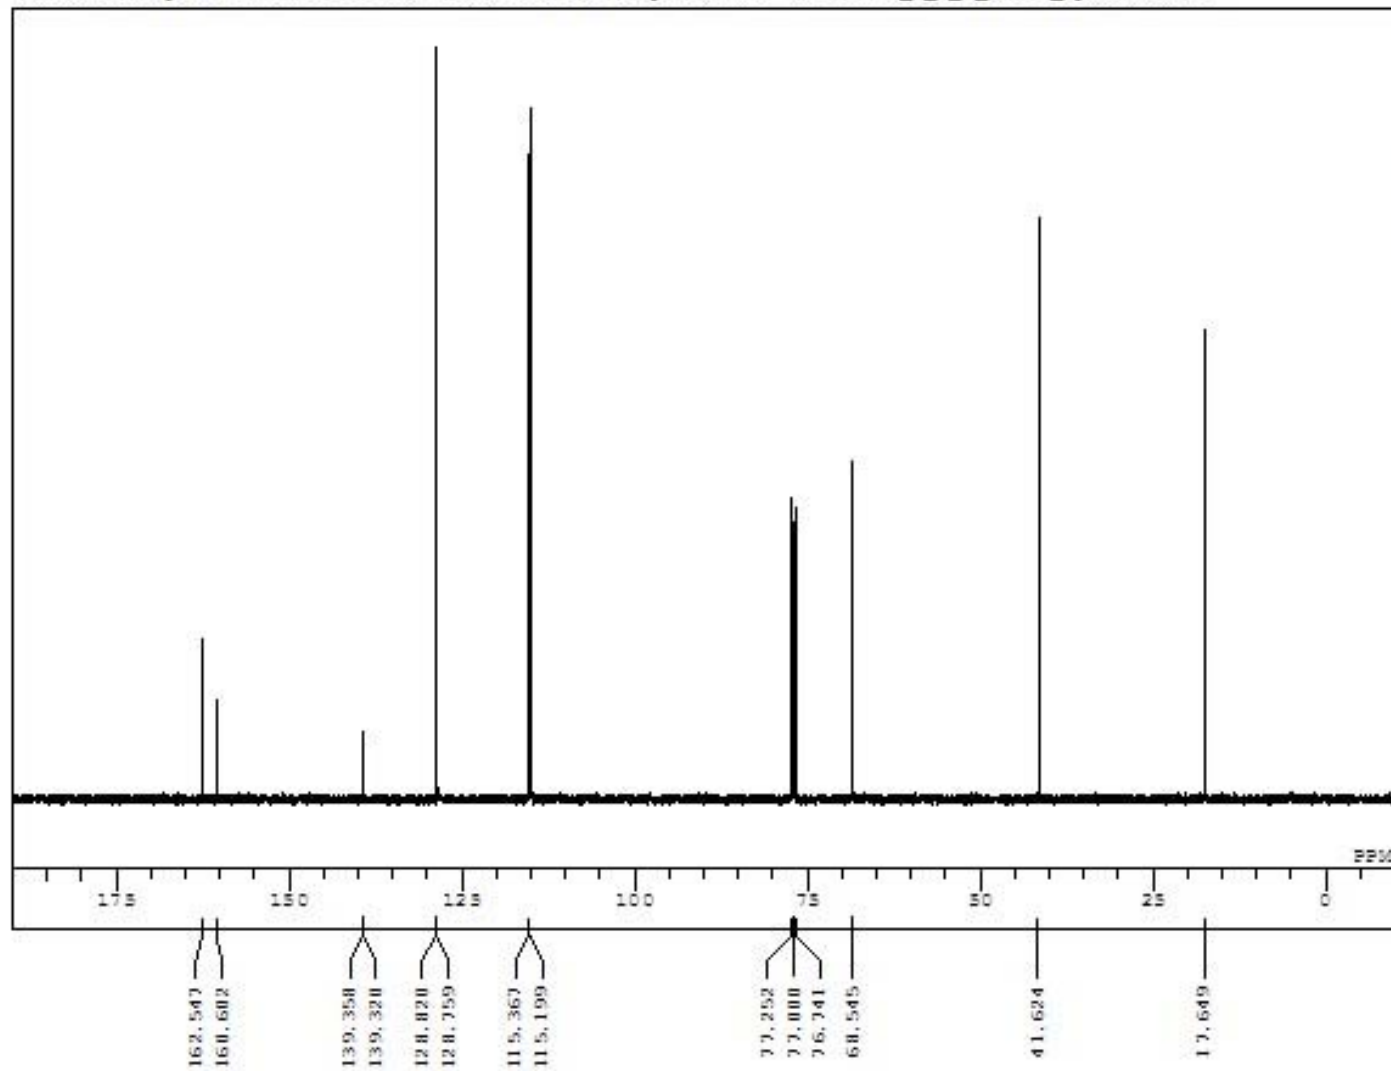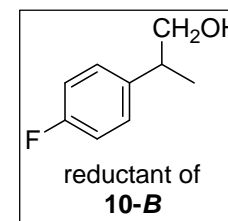

\\fso-c08\o-gchem-lab2\TeamG\17\ZODI-4-22E23"N"xj\ZAGzff(f^\Alice\mk\_a\_3\_4\_ld\_2\_spectrum.als

```

DFILE mk_a_3_4_ld_2_spectrum.als
COMENT Single Pulse Experiment
DATIM 2011-08-04 17:01:55
OBNUC 1H
EXMDD single_pulse.exp
OBFRQ 500.16 MHz
OBSET 2.41 KHz
OBFIN 6.01 Hz
POINT 16384
FREQU 10010.01 Hz
SCANS 16
AQTM 1.6368 sec
PD 4.0000 sec
FW1 7.00 usec
IRNUC
OTEMP 21.5 c
SLVMT CDCL3
EXREF 0.00 ppm
BF 0.12 Hz
RGAIN 14
    
```

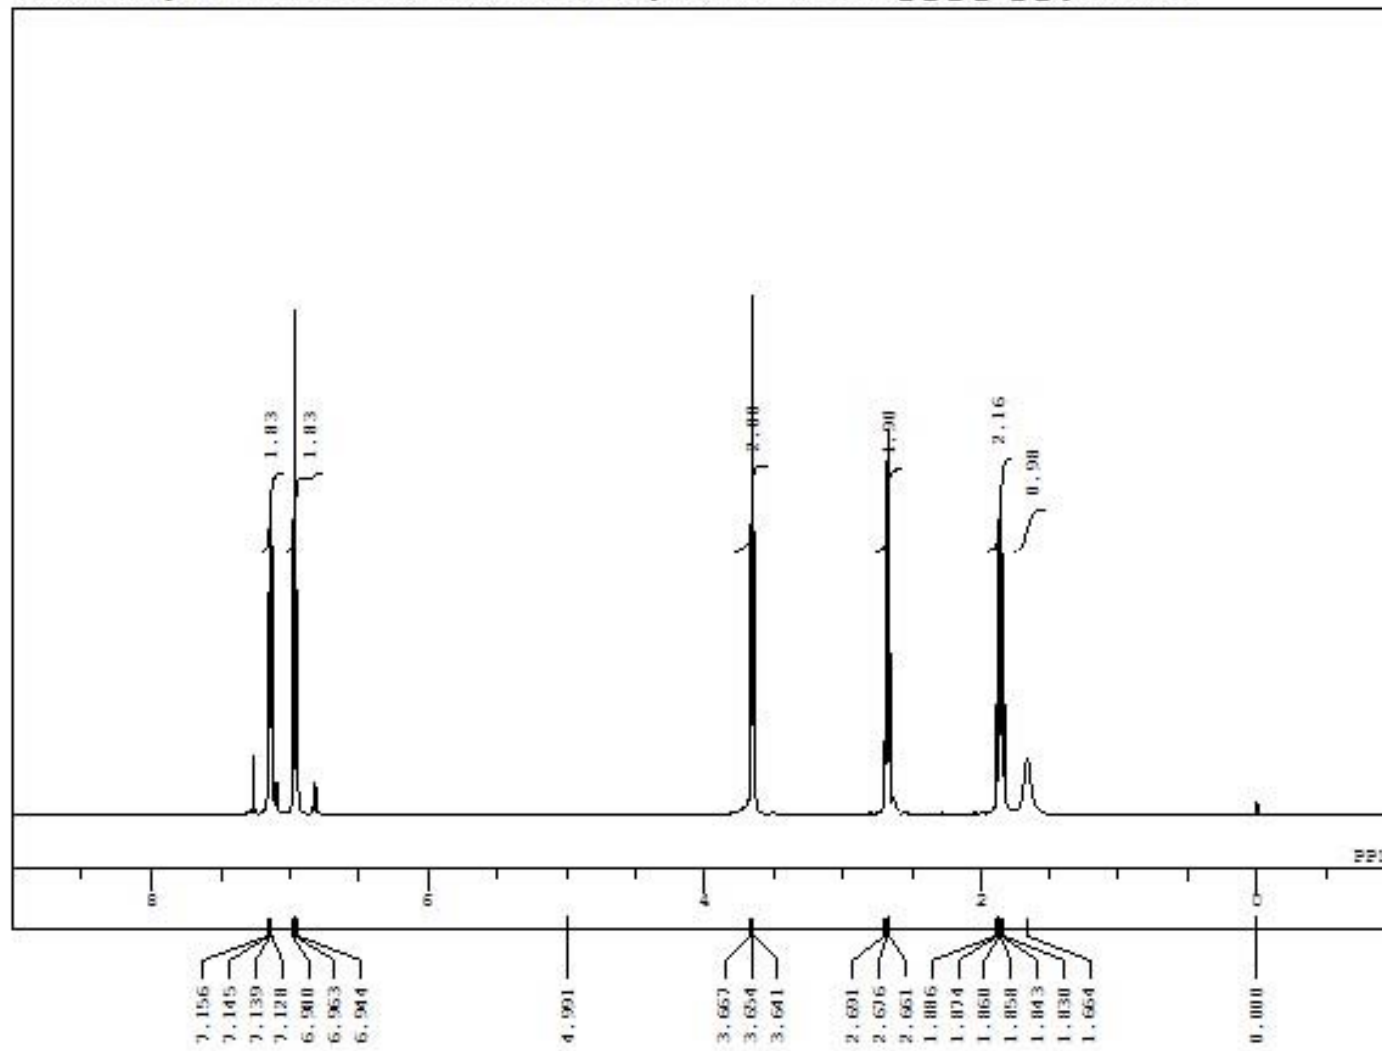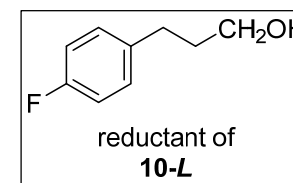

\\Fao-c08\orgchem-lab2\Team2\ (17) ZODI-4-22E23\W\*xj\ZAGzff\Alice\mk\_s\_3\_4\_13c\_spectrum.als

DFILE mk\_s\_3\_4\_13c\_spectrum.als  
COMMT Single Pulse with Broadband  
DATIM 2011-05-28 01:44:57  
CENUC 13C  
EXMOD single\_pulse\_dec  
OBFRQ 125.77 MHz  
OBSET 7.87 KHz  
OBFIN 4.21 Hz  
POINT 32768  
FREQU 31446.54 Hz  
SCANS 2048  
AQTM 1.0420 sec  
PD 1.0000 sec  
PWL 4.47 usec  
IRNUC 1H  
CTEMP 21.1 c  
SOLVENT CDCL3  
EXREF 77.00 ppm  
BF 0.12 Hz  
RGAIN 28

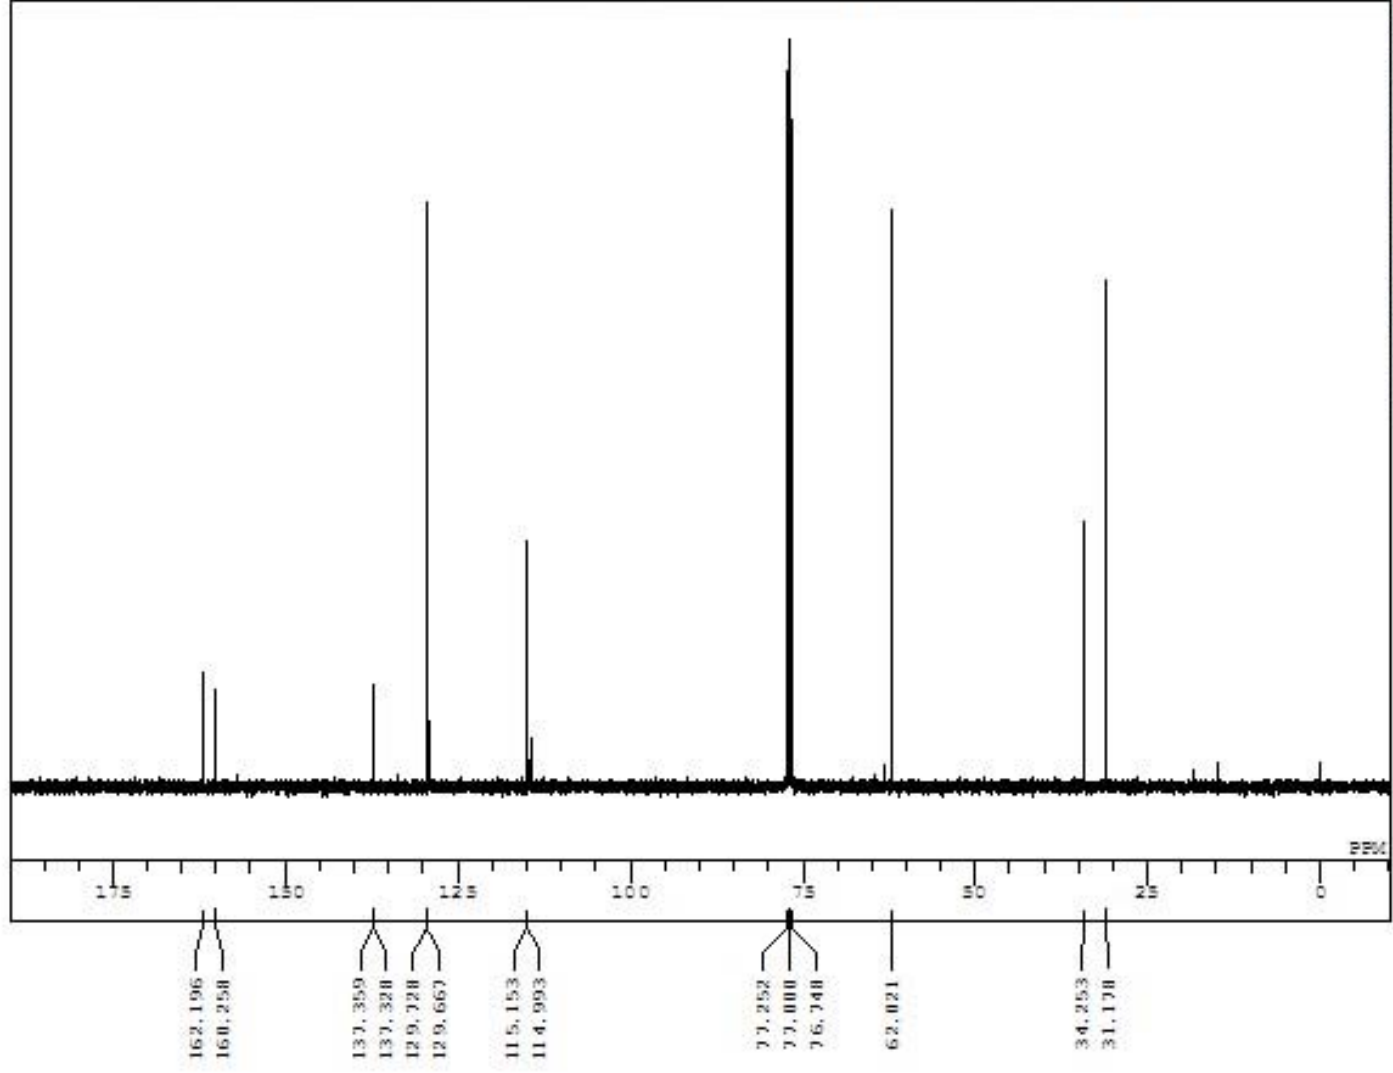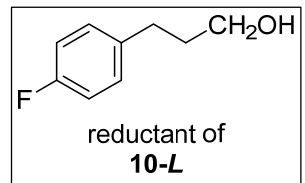

\\fso-c08\o-gchem-lab2\TeamG\17\ZODI-H-22E23\31\*x\ZAGzff\Alice\mk\_e\_2\_3\_1d\_spectrum.als

```

DFILE mk_e_2_3_1d_spectrum.als
COMNT Single Pulse Experiment
DATIM 2011-05-31 09:13:18
OBNUC 1H
EXMDD single_pulse.exp
OBFRQ 500.16 MHz
OBSET 2.41 kHz
OBFIN 6.01 Hz
POINT 16384
FREQU 10010.01 Hz
SCANS 128
AQTM 1.6368 sec
PD 4.0000 sec
FW 7.00 usec
IRNUC
OTEMP 18.8 c
SLVNT CDCL3
EXREF 7.26 ppm
BF 0.12 Hz
RGAIN 17
    
```

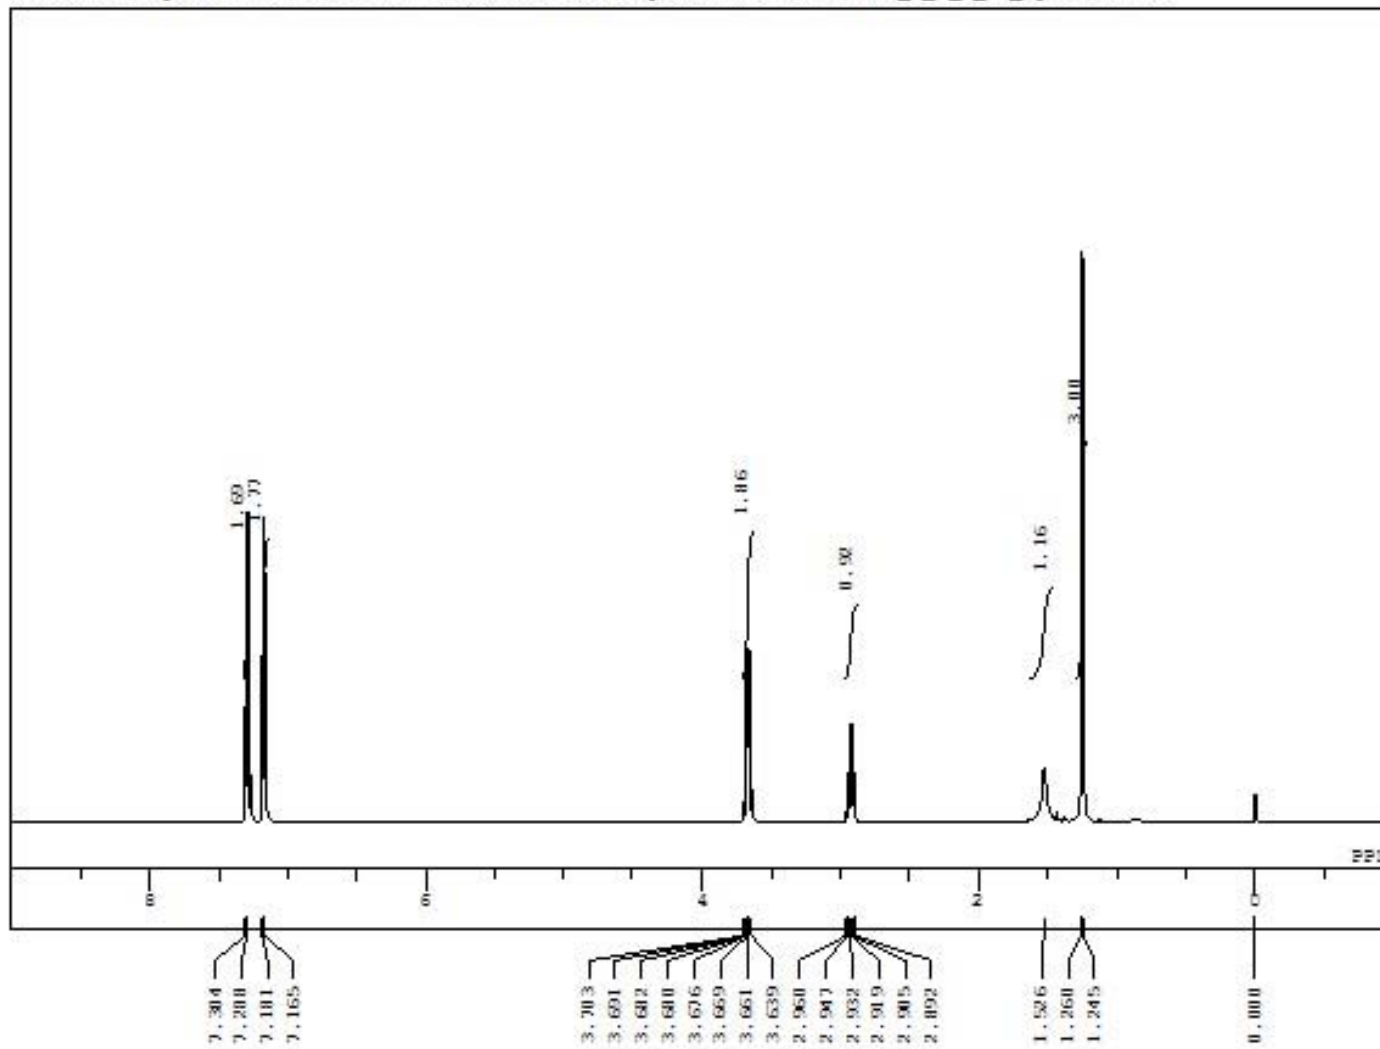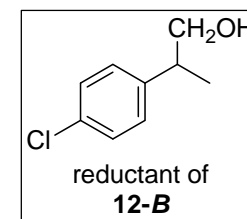

\\Fao-c08\orgchem-lab2\TeamG\ (17) ZODI-4-2ZE23"Xj\ZAZzff (f^\Alice\mk\_a\_2\_3\_13c\_spectrum.ala

DFILE mk\_a\_2\_3\_13c\_spectrum.ala  
COMMT Single Pulse with Broadband  
DATIM 2011-05-31 07:28:24  
CENUC 13C  
EXMOD single\_pulse\_dec  
OBFRQ 125.77 MHz  
OBSET 7.87 KHz  
OBFIN 4.21 Hz  
POINT 32768  
FREQU 31446.54 Hz  
SCANS 16384  
AQTM 1.0420 sec  
PD 1.0000 sec  
PWL 4.47 usec  
IRNUC 1H  
CTEMP 20.2 c  
SLVNT CDCL3  
EKREF 77.00 ppm  
BF 0.12 Hz  
RGAIN 28

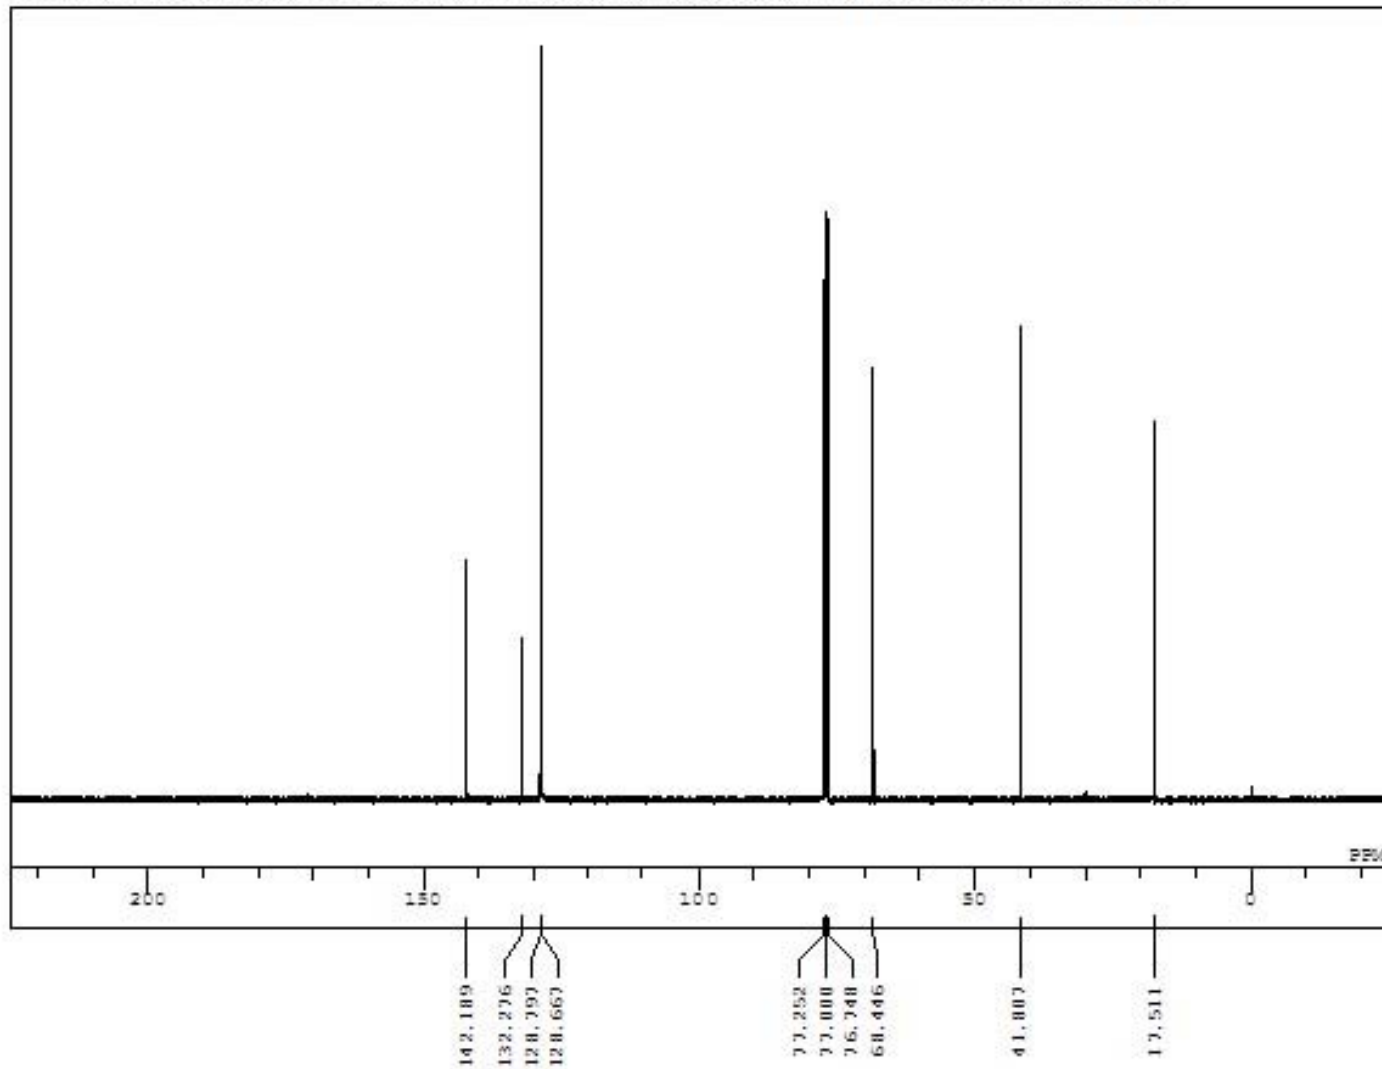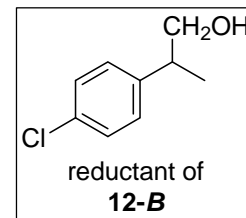

\\fao-c08\o-gchem-lab2\TeamG\17\ZODI-4-22E23\31\*xj\ZAGzff\Alice\mk\_a\_2\_4\_ld\_spectrum.als

DFILE mk\_a\_2\_4\_ld\_spectrum.als  
COMNT Single Pulse Experiment  
DATIM 2011-05-28 08:35:04  
OBNUC 1H  
EXMDD single\_pulse.exp  
OBFRQ 500.16 MHz  
OBSET 2.41 KHz  
OBFIN 6.01 Hz  
POINT 16384  
FREQU 10010.01 Hz  
SCANS 16  
ACQTM 1.6368 sec  
PD 4.0000 sec  
FW1 7.00 usec  
IRNUC  
OTEMP 19.1 c  
SLVNT CDCL3  
EXREF 0.00 ppm  
BF 0.12 Hz  
RGAIN 17

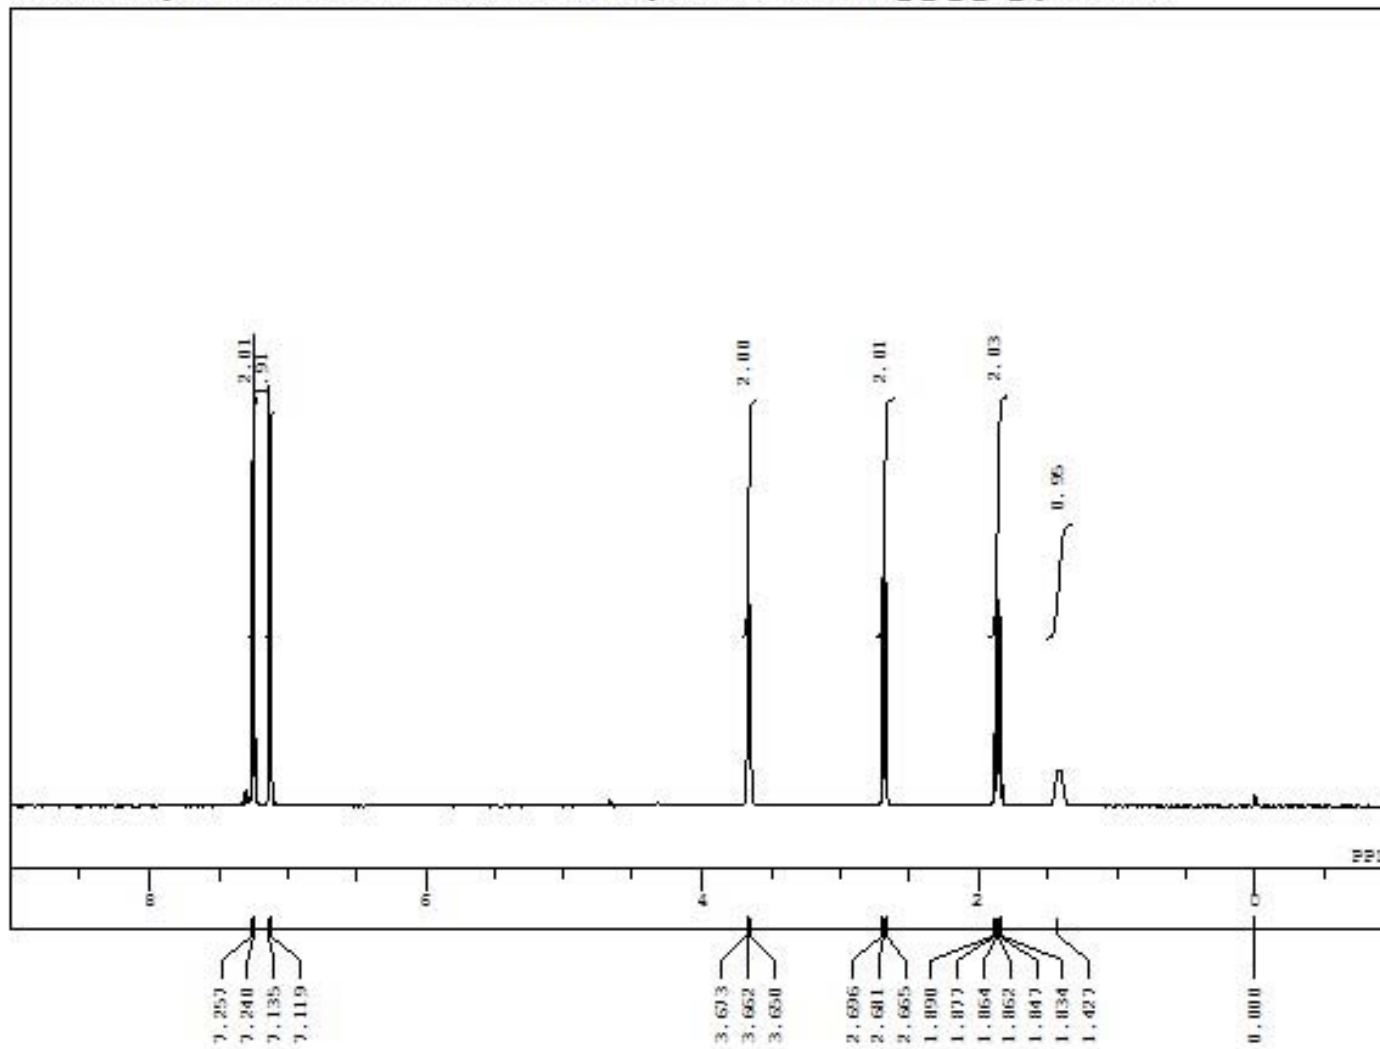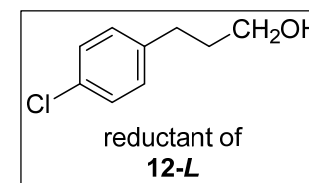



\\Fao-c08\orgchem-lab2\TeamG\ (17) ZODI-4-2ZE23\N\*xj\ZAZzff (f^\Alice\mk\_a\_2\_4\_13c\_spectrum.als

DFILE mk\_a\_2\_4\_13c\_spectrum.als  
COMMT Single Pulse with Broadband  
DATIM 2011-05-28 08:43:07  
CENUC 13C  
EXMOD single\_pulse\_dec  
OBFRQ 125.77 MHz  
OBSET 7.87 KHz  
OBFIN 4.21 Hz  
POINT 32768  
FREQU 31446.54 Hz  
SCANS 200  
AQTM 1.0420 sec  
PD 1.0000 sec  
FWL 4.47 usec  
IRNUC 1H  
CTEMP 20.2 c  
SLVNT CDCL3  
EXREF 77.00 ppm  
BF 0.12 Hz  
RGAIN 30

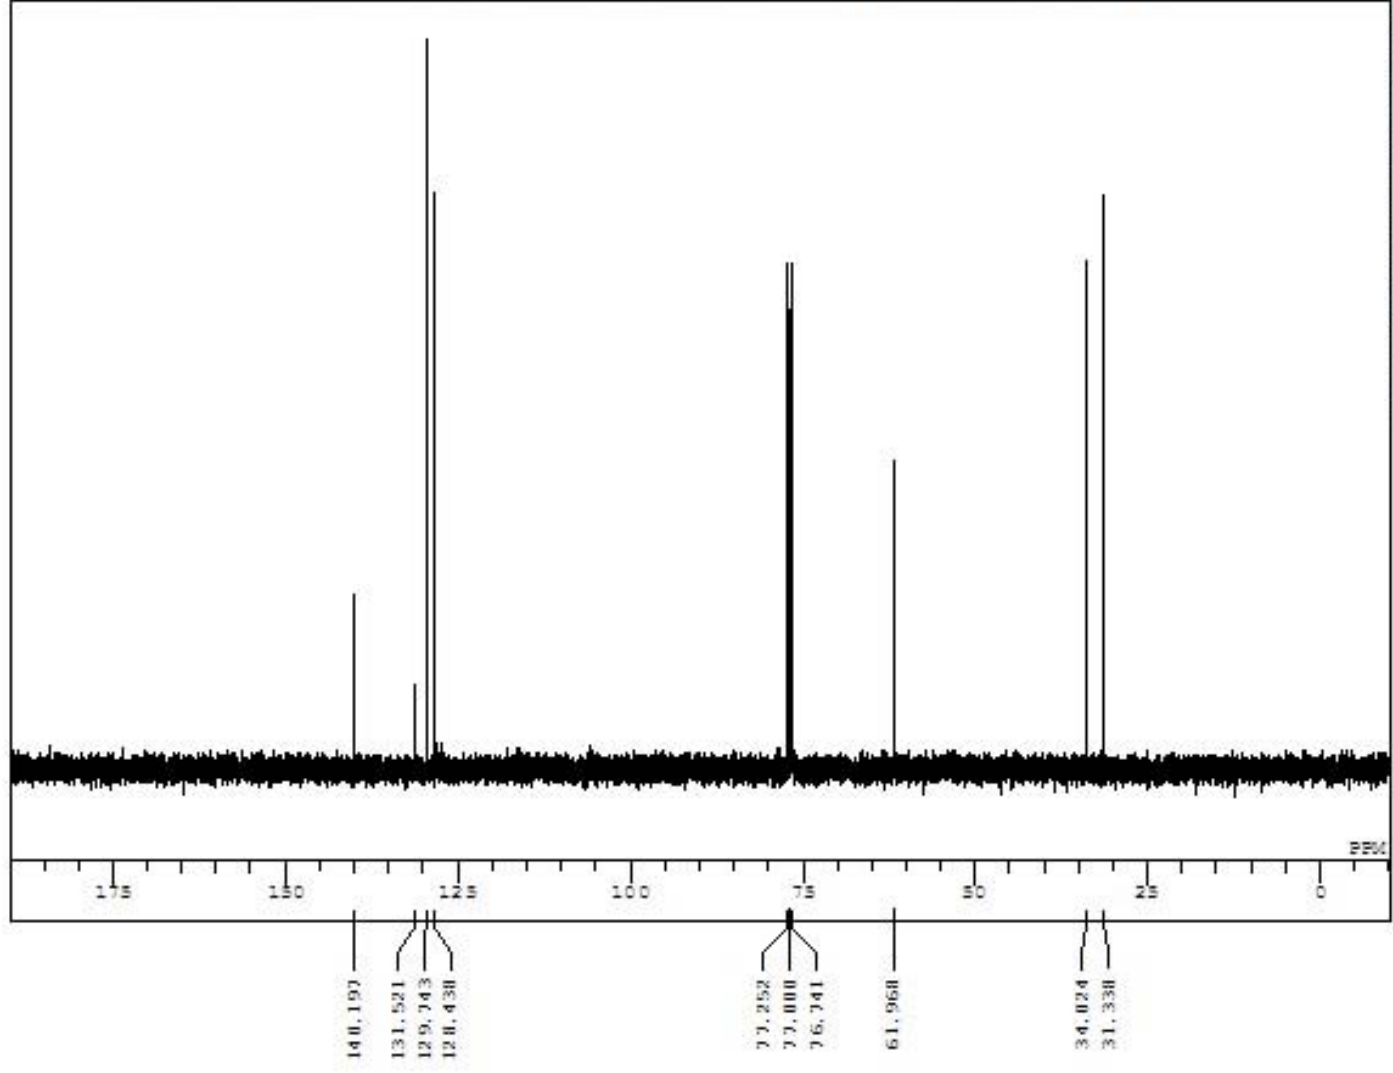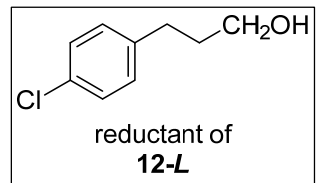

\\fso-c08\orgchem-lab2\TeamG\17\ZODI-4-22E23\31\*xj\ZAGzff\Alice\mk\_a\_9\_3\_1d\_spectrum.als

```

DFILE mk_a_9_3_1d_spectrum.als
COMENT Single Pulse Experiment
DATIM 2012-02-23 16:21:27
OBNUC 1H
EXMDD single_pulse.exp
OBFRQ 500.16 MHz
OBSET 2.41 kHz
OBFIN 6.01 Hz
POINT 16384
FREQU 10010.01 Hz
SCANS 16
AQTM 1.6368 sec
PD 4.0000 sec
PW1 7.00 usec
IRNUC
OTEMP 19.7 c
SLVNT CDCL3
EXREF 0.00 ppm
BF 0.12 Hz
RGAIN 19
    
```

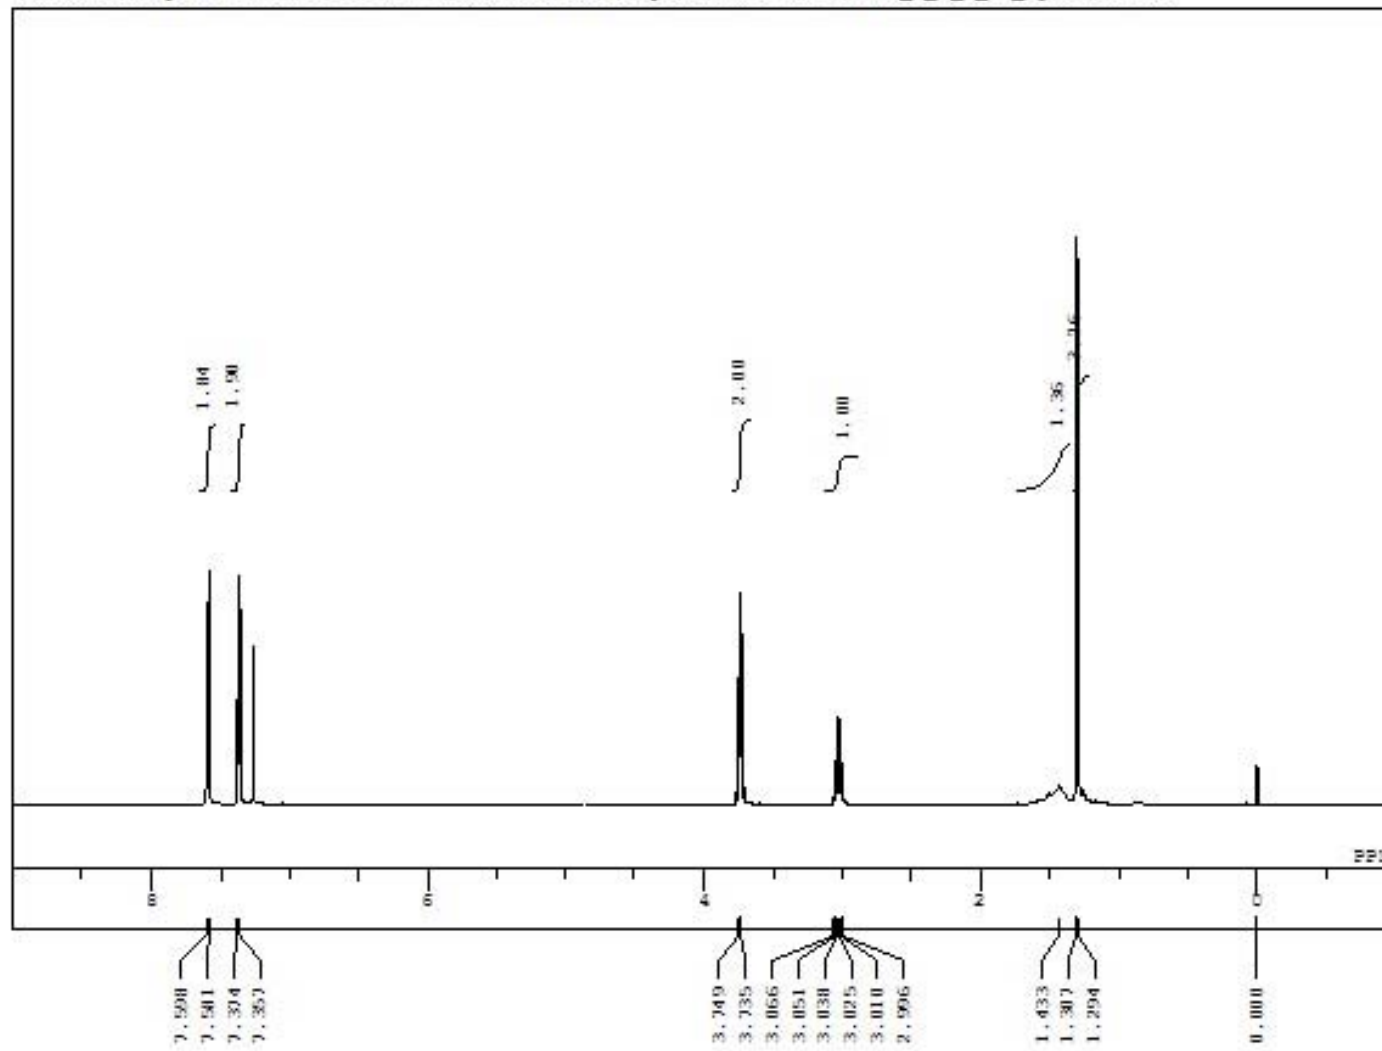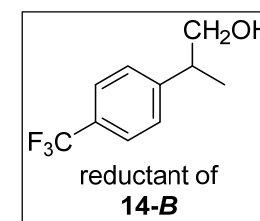

C:\Users\o-nagato\Desktop\mk\_a\_9\_3\_130.a1a

DFILE mk\_a\_9\_3\_130.a1a  
COMMT Single Pulse with Broadband  
DATIM 2012-03-29 10:03:57  
CENUC 13C  
EXMOD single\_pulse\_dec  
OBFRQ 125.77 MHz  
OBSET 7.87 KHz  
OBFIN 4.21 Hz  
POINT 32768  
FREQU 31446.54 Hz  
SCANS 21528  
AQQT 1.0420 sec  
PD 1.0000 sec  
PWL 4.47 usec  
IRNUC 1H  
CTEMP 23.1 c  
SLVNT CDCL3  
EKREF 77.00 ppm  
BF 0.10 Hz  
RGAIN 28

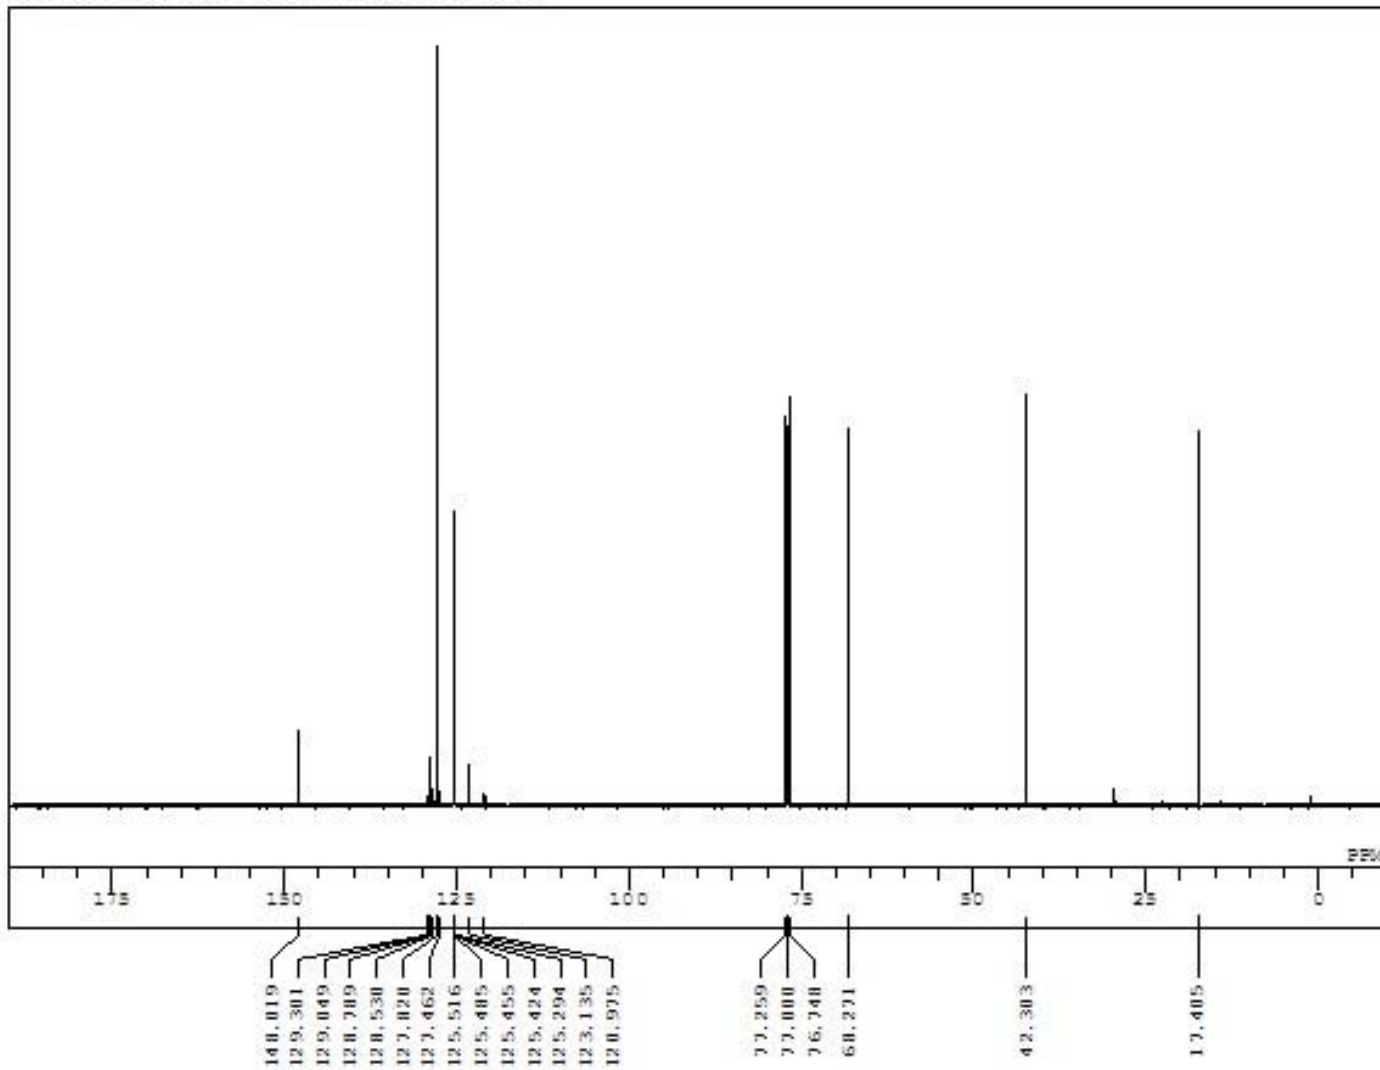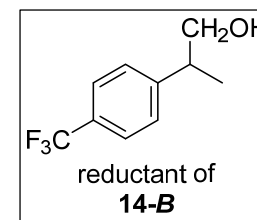

\\fso-c08\oegchan-lab2\TeamG\17\ZODI-4-22E23\31\*xj\ZAGzff\Alice\mk\_a\_9\_4\_ld\_spectrum.als

```

DFILE mk_a_9_4_ld_spectrum.als
COMNT Single Pulse Experiment
DATIM 2012-03-01 10:46:56
OBNUC 1H
EXMDD single_pulse.exp
OBFRQ 500.16 MHz
OBSET 2.41 kHz
OBFIN 6.01 Hz
POINT 16384
FREQU 10010.01 Hz
SCANS 16
AQTM 1.6368 sec
PD 4.0000 sec
FW1 7.00 usec
IRNUC
OTEMP 19.3 c
SLVMT CDCL3
EXREF 0.00 ppm
BF 0.12 Hz
RGAIN 19
    
```

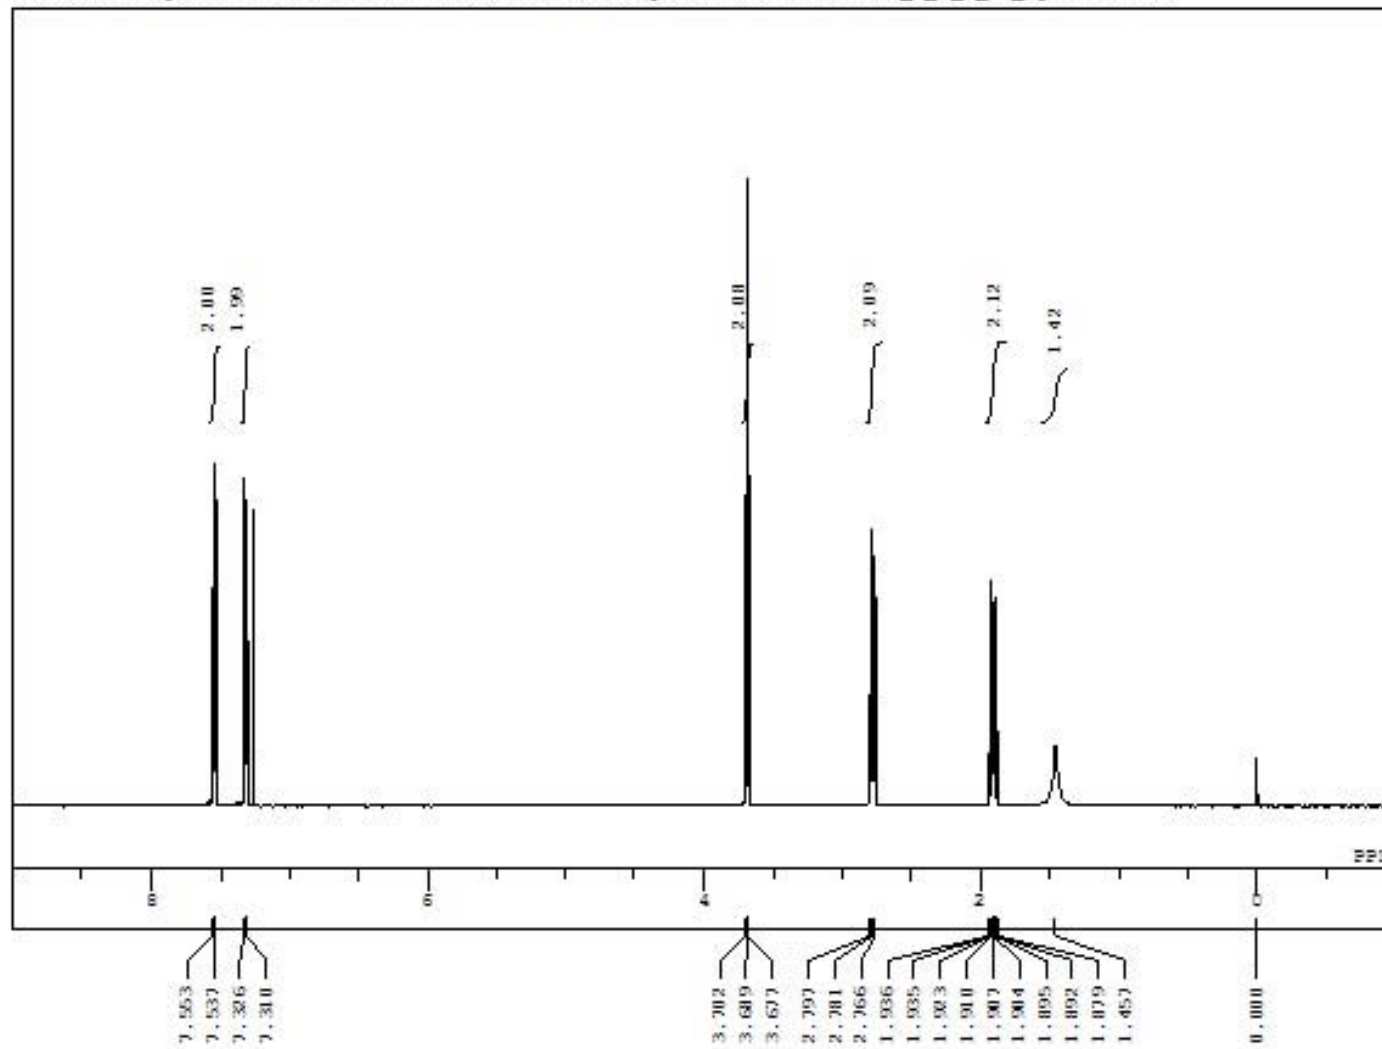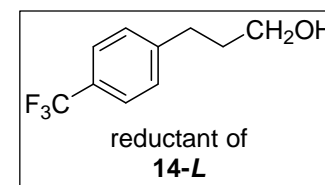

\\fao-c08\orgchem-lab2\TeamG\17\ZODI-4-22E23"N"xj\ZAGsff(f^\1Hs13CNGR&IR&MS&HRMS\alcohol\_1\7\_p-CF3\mk\_a\_9\_4\_13c\_spectrum.ala  
 DFILE mk\_a\_9\_4\_13c\_spectrum.ala  
 POINT Single\_Pulse with Broadband  
 13c\_spectrum.ala  
 DATE 2012-03-21 17:13:09

OBNUC 13C  
 EXMOD single\_pulse\_dec  
 OBFRQ 125.77 MHz  
 OBSET 7.87 KHz  
 OBFIM 4.21 Hz  
 POINT 32768  
 FREQU 31446.54 Hz  
 SCANS 3400  
 ACQTM 1.0420 sec  
 PD 1.0000 sec  
 FW1 4.47 usec  
 IRNUC 1H  
 OTEMP 22.3 c  
 SLVNT CDCL3  
 EXREF 77.00 ppm  
 BF 0.12 Hz  
 RGAIN 30

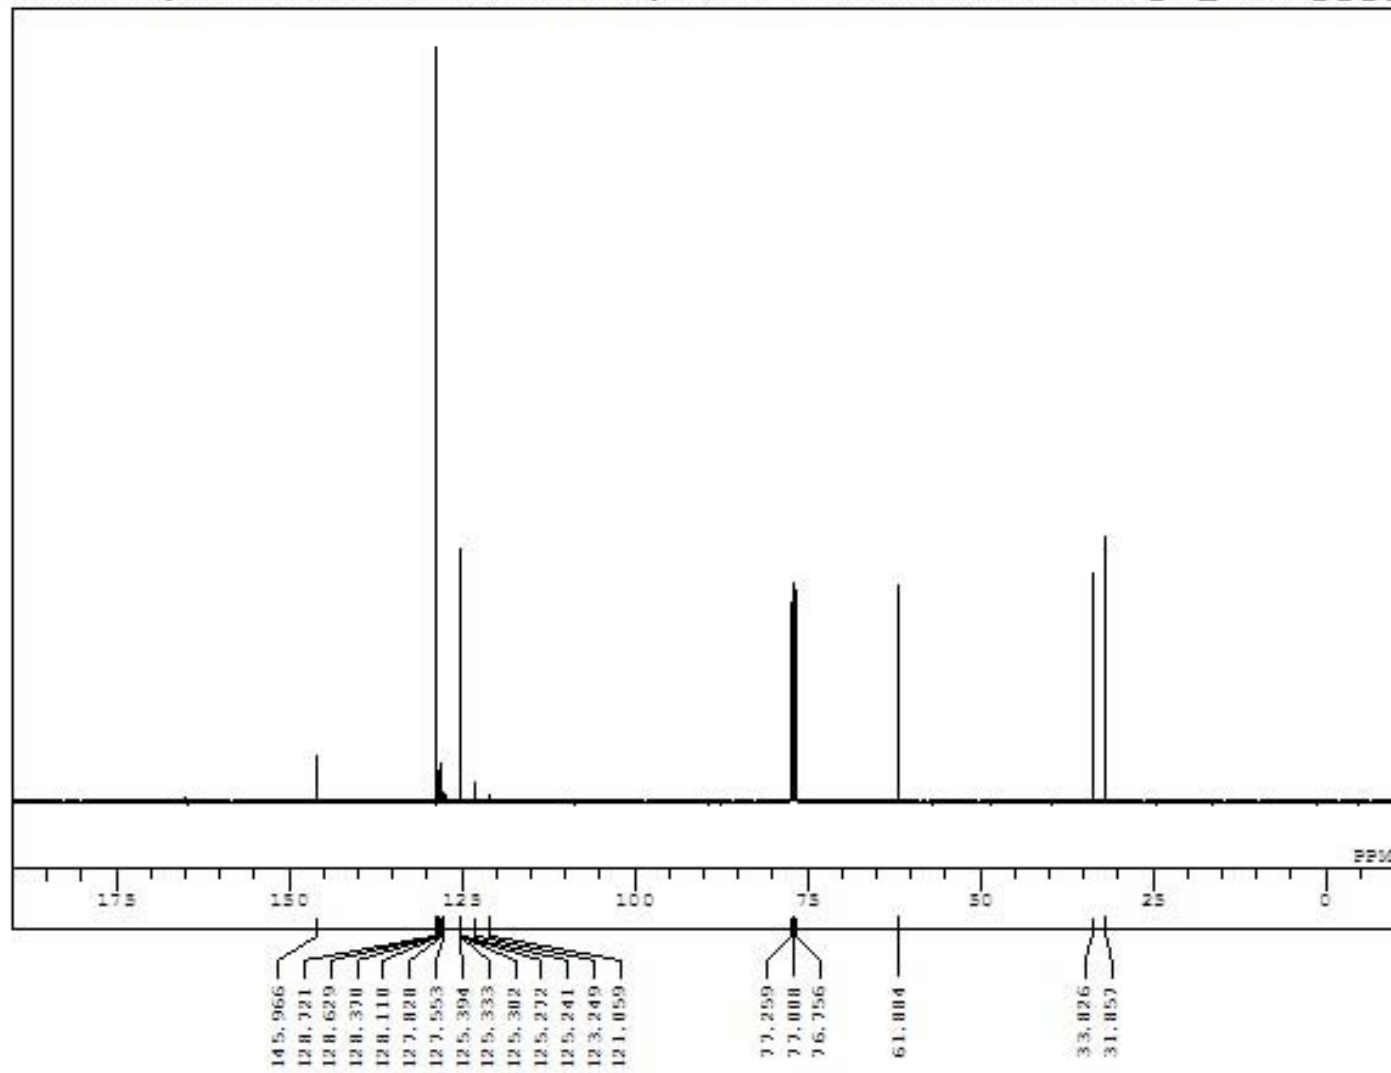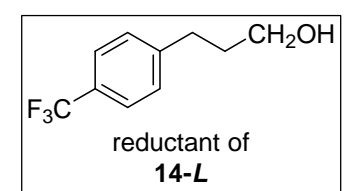

\\fso-c08\orgchem-lab2\TeamG\17\ZODI-H-22E23\31\*x\ZAEff\Alice\mk\_a\_7\_3\_1d\_spectrum.als

```

DFILE mk_a_7_3_1d_spectrum.als
COMNT Single Pulse Experiment
DATIM 2011-09-13 16:13:12
OBNUC 1H
EXMDD single_pulse.exp
OBFRQ 500.16 MHz
OBSET 2.41 kHz
OBFIN 6.01 Hz
POINT 16384
FREQU 10010.01 Hz
SCANS 16
AQTM 1.6368 sec
PD 4.0000 sec
FW1 7.00 usec
IRNUC
OTEMP 21.4 c
SLVNT CDCL3
EXREF 0.00 ppm
BF 0.12 Hz
RGAIN 18
    
```

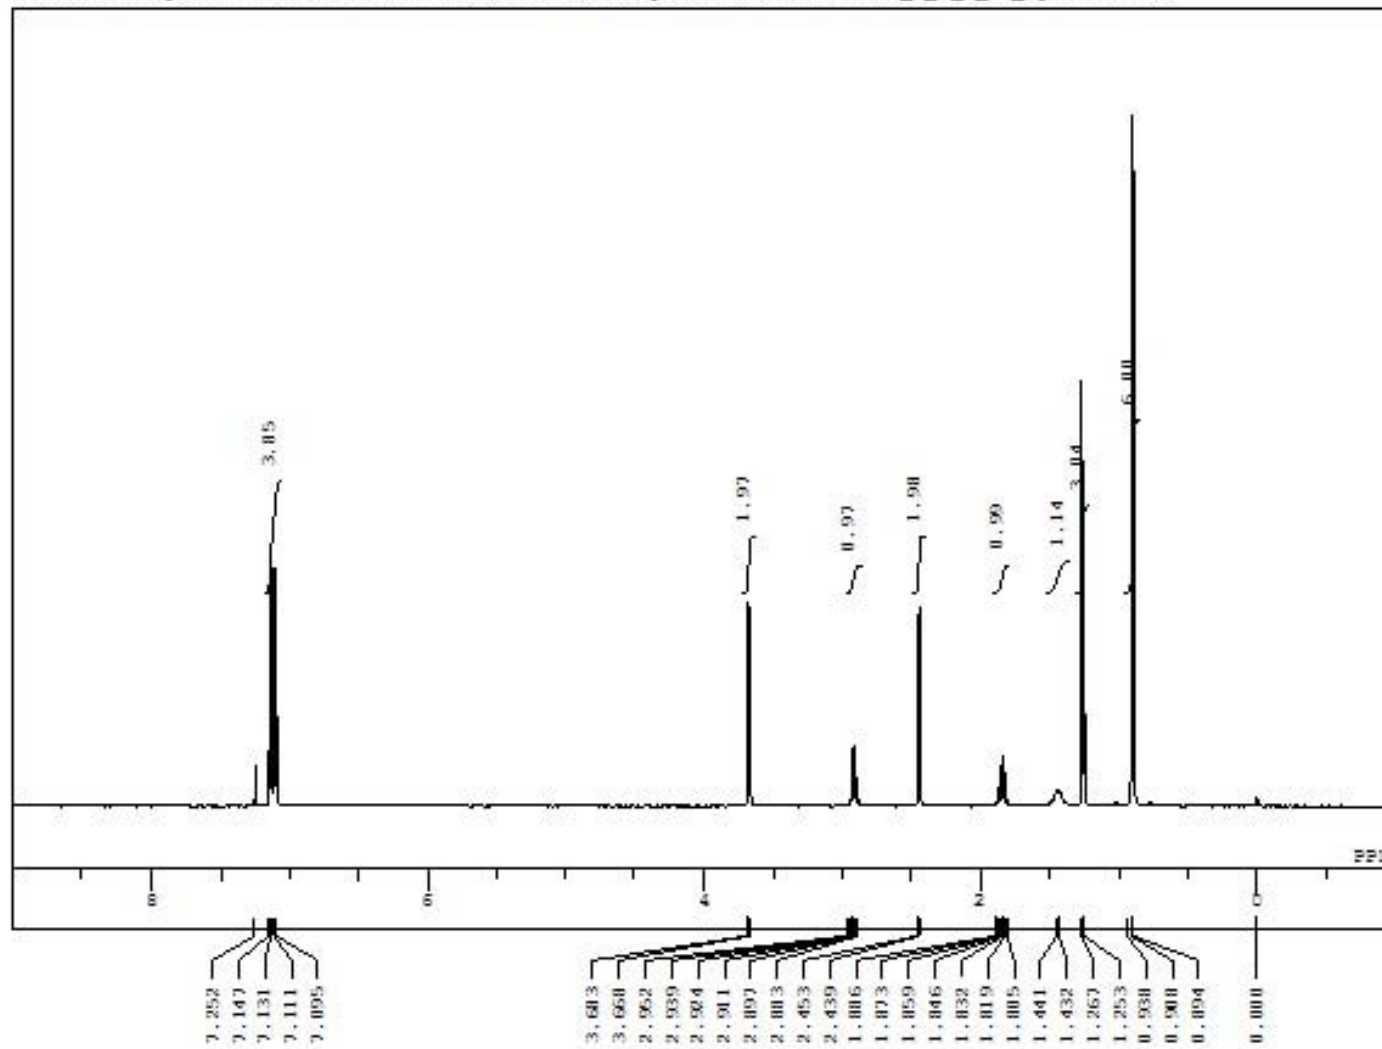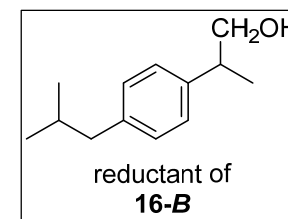

\\fso-c08\orgchem-lab2\TeamG\17\ZODI-4-22E23\01\*xj\ZAGzff(f^)\Alice\mk\_a\_7\_3\_13c\_spectrum.ala

DFILE mk\_a\_7\_3\_13c\_spectrum.ala  
COMNT Single Pulse with Broadband  
DATIM 2011-09-13 19:05:23  
OBNUC 13C  
EXMDD single\_pulse\_dec  
OBFRQ 125.77 MHz  
OBSET 7.87 KHz  
OBFIN 4.21 Hz  
POINT 32768  
FREQU 31446.54 Hz  
SCANS 1500  
AQTM 1.0420 sec  
PD 1.0000 sec  
FW1 4.47 usec  
IRNUC 1H  
OTEMP 23.0 c  
SLVMT CDCL3  
EXREF 77.00 ppm  
BF 0.12 Hz  
RGAIN 28

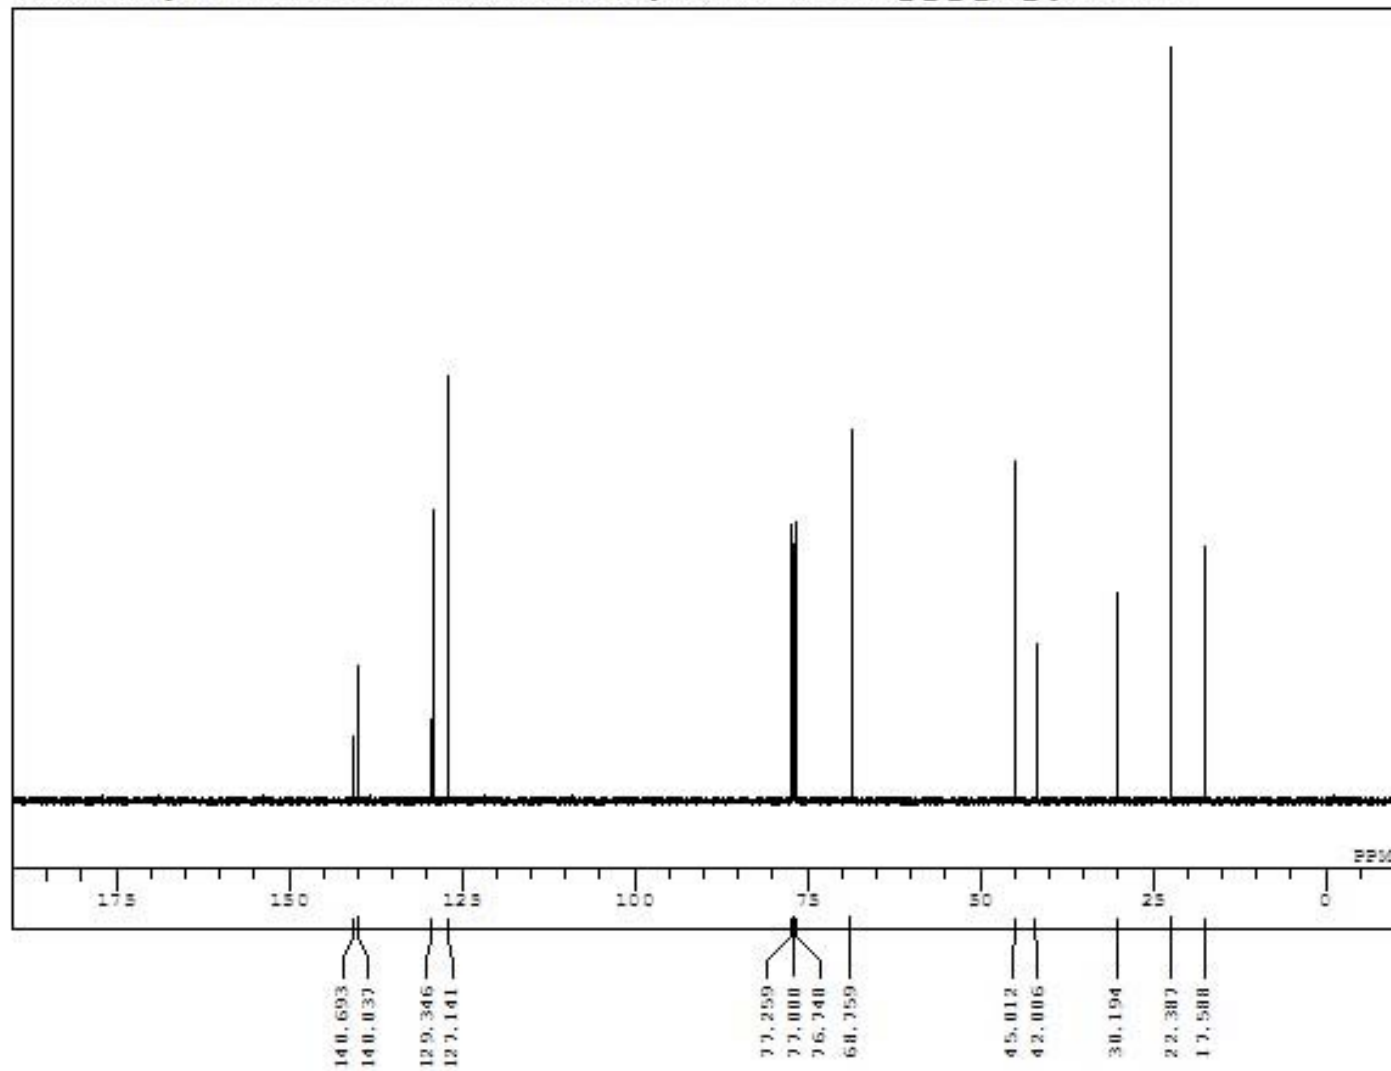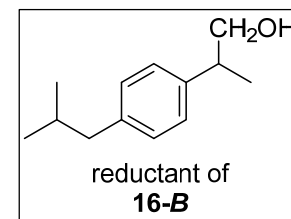

\\fso-c08\o-gchem-lab2\TeamG\17\ZODI-4-22E23\31\*x\ZAGzff\Alice\mk\_a\_7\_4\_ld\_spectrum.als

```

DFILE mk_a_7_4_ld_spectrum.als
COMNT Single Pulse Experiment
DATIM 2011-09-13 21:40:41
OBNUC 1H
EXMDD single_pulse.exp
OBFRQ 500.16 MHz
OBSET 2.41 kHz
OBFIN 6.01 Hz
POINT 16384
FREQU 10010.01 Hz
SCANS 16
AQTM 1.6368 sec
PD 4.0000 sec
FW1 7.00 usec
IRNUC
OTEMP 21.8 c
SOLVENT CDCL3
EXREF 0.00 ppm
BF 0.12 Hz
RGAIN 17
    
```

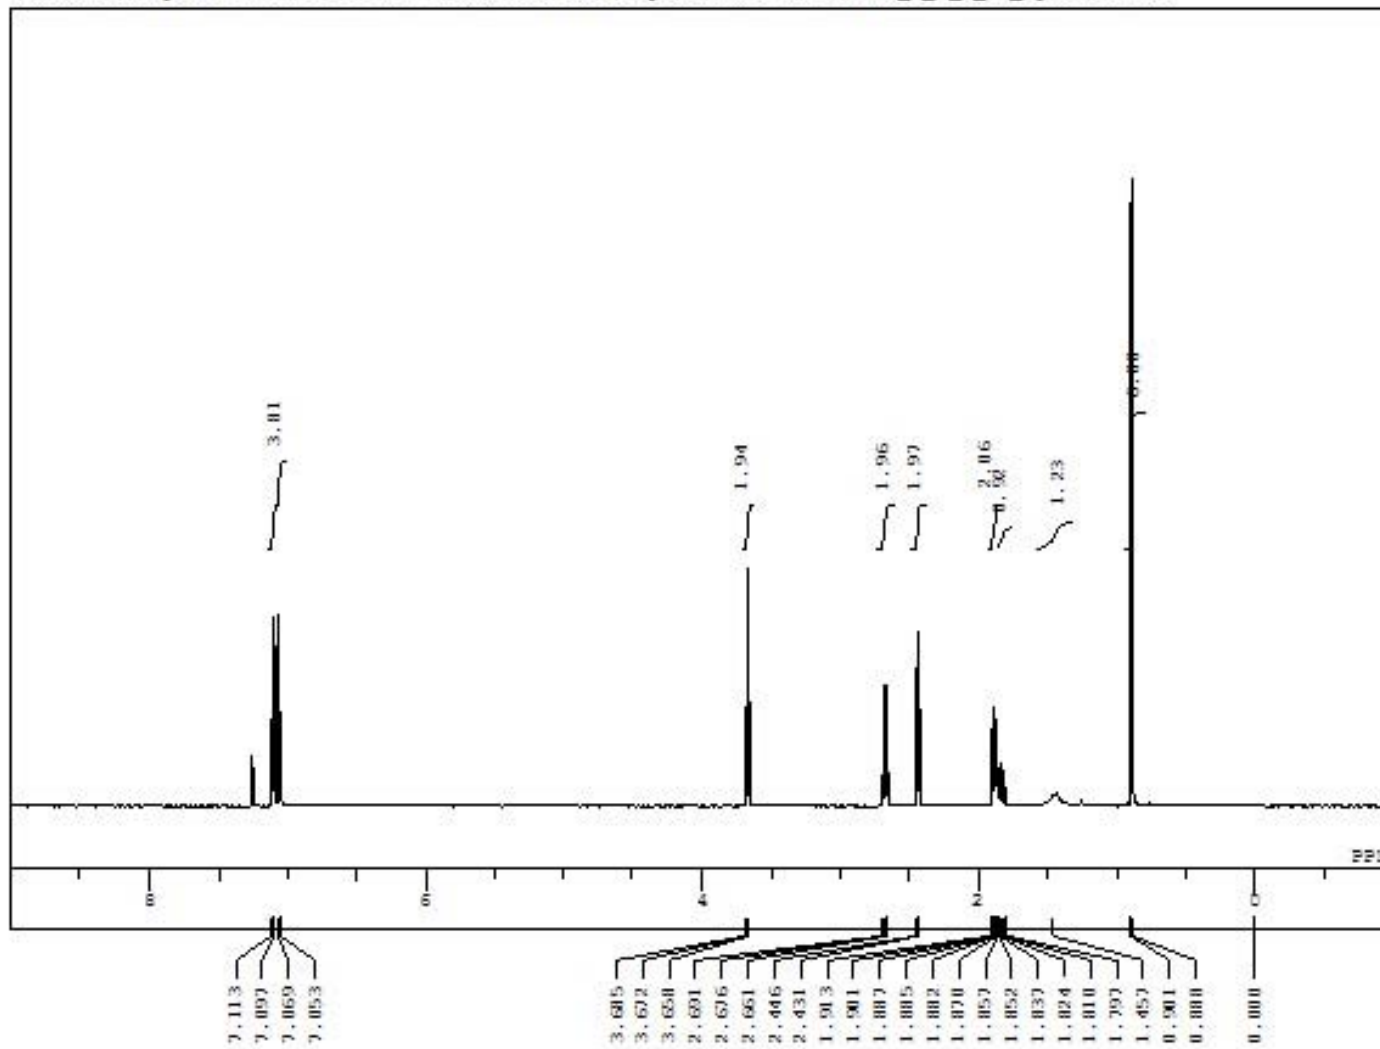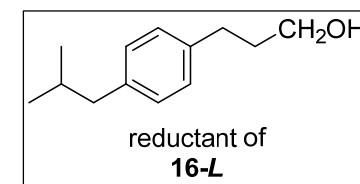



\\Fao-c08\orgchem-lab2\Team2\ (17) ZODI-4-22E23\W\*xj\ZAZzff (f^\Alice\mk\_s\_7\_4\_13c\_spectrum.als

DFILE mk\_s\_7\_4\_13c\_spectrum.als  
COMMT Single Pulse with Broadband  
DATIM 2011-09-13 22:43:07  
CENUC 13C  
EXMOD single\_pulse\_dec  
OBFRQ 125.77 MHz  
OBSET 7.87 KHz  
OBFIN 4.21 Hz  
POINT 32768  
FREQU 31446.54 Hz  
SCANS 1800  
AQTM 1.0420 sec  
PD 1.0000 sec  
FWL 4.47 usec  
IRNUC 1H  
CTEMP 23.1 c  
SLVNT CDCL3  
EKREF 77.00 ppm  
BF 0.12 Hz  
RGAIN 28

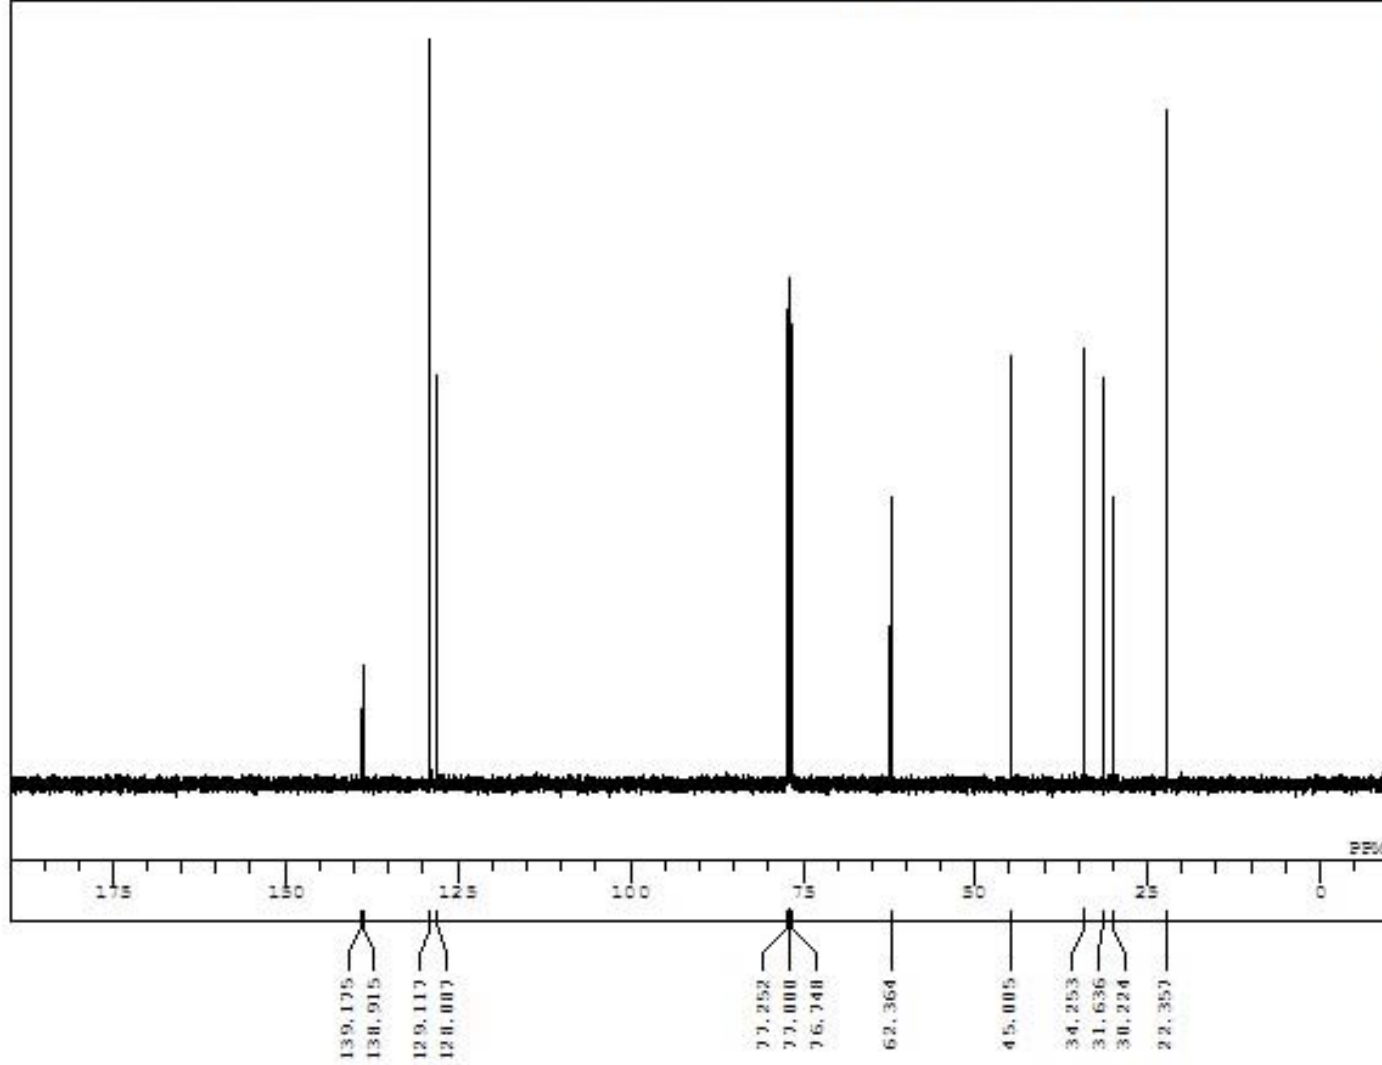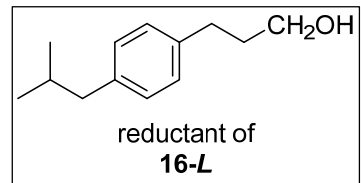

\\fso-c08\orgchem-lab2\TeamG\17\ZODI-H-22E23\31\*xj\ZAEff\Alice\mk\_e\_8\_3\_1d\_spectrum.als

DFILE mk\_e\_8\_3\_1d\_spectrum.als  
 COMNT Single Pulse Experiment  
 DATIM 2011-09-05 13:37:59  
 OBNUC 1H  
 EXMDD single\_pulse.exp  
 OBFRQ 500.16 MHz  
 OBSET 2.41 KHz  
 OBFIM 6.01 Hz  
 POINT 16384  
 FREQU 10010.01 Hz  
 SCANS 16  
 ACQTM 1.6368 sec  
 PD 4.0000 sec  
 PW1 7.00 usec  
 IRNUC  
 OTEMP 20.3 c  
 SOLVENT CDCL3  
 EXREF 0.00 ppm  
 BF 0.12 Hz  
 RGAIN 19

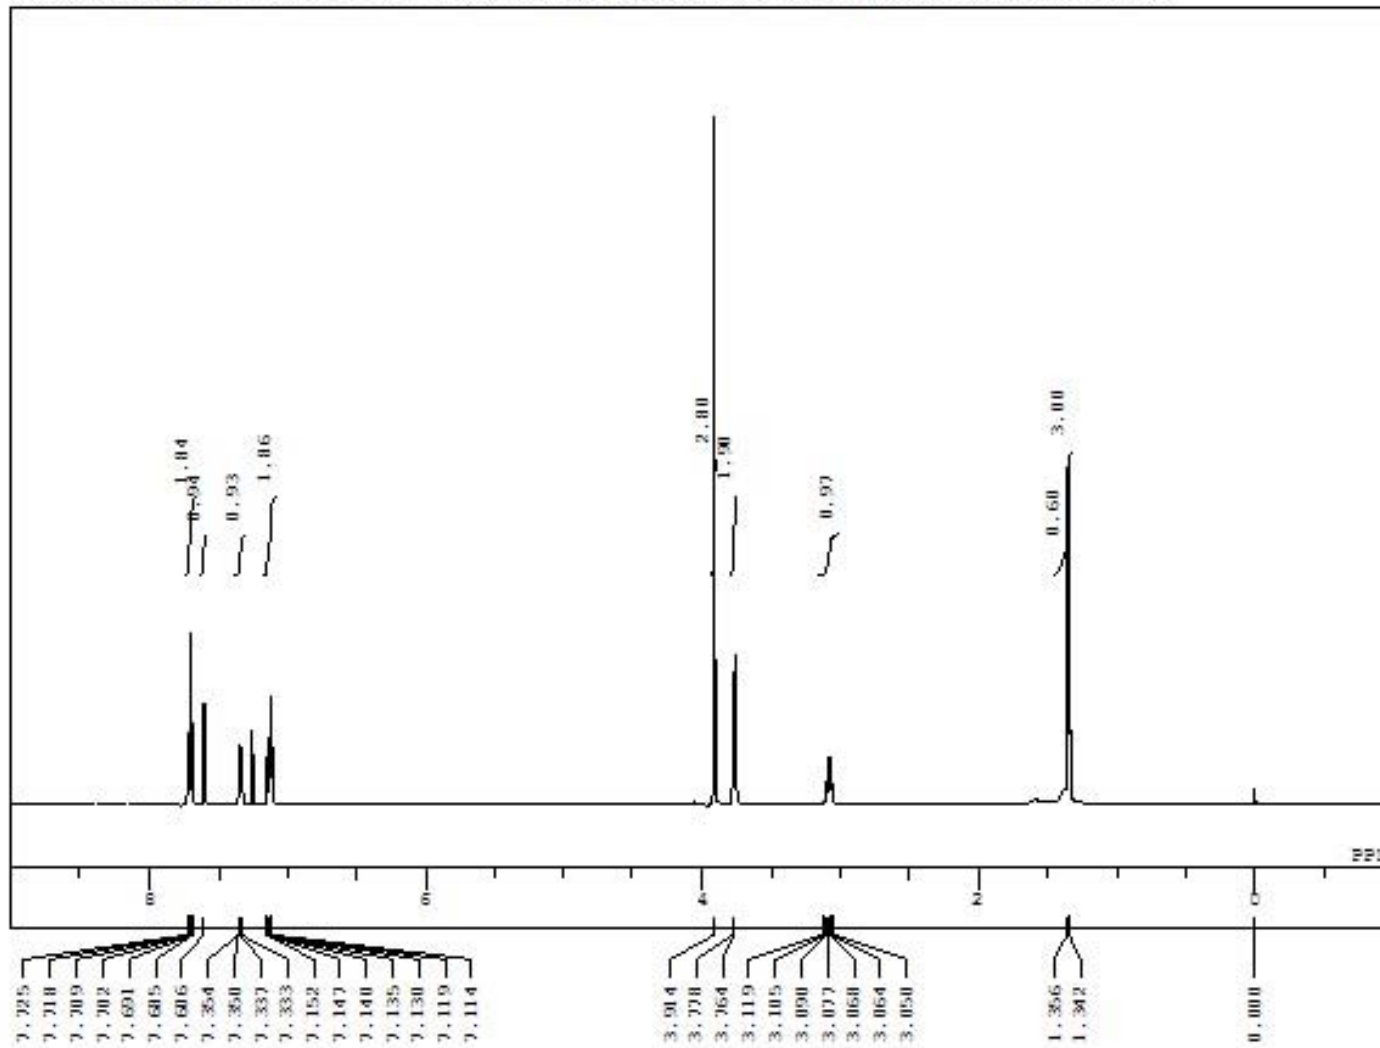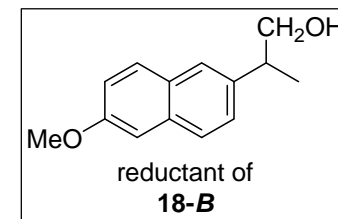

\\fao-c08\orgchem-lab2\TeamG\17\ZODI-H-22E23\01\*xj\ZAGzff(f^)\Alice\mk\_a\_8\_3\_13c\_spectrum.ala

DFILE mk\_a\_8\_3\_13c\_spectrum.ala  
COMNT Single Pulse with Broadband  
DATIM 2011-09-05 14:47:12  
OBNUC 13C  
EXMDD single\_pulse\_dec  
OBFRQ 125.77 MHz  
OBSET 7.87 KHz  
OBFIN 4.21 Hz  
POINT 32768  
FREQU 31446.54 Hz  
SCANS 2000  
ACQTM 1.0420 sec  
PD 1.0000 sec  
FW1 4.47 usec  
IRNUC 1H  
OTEMP 21.9 c  
SLVMT CDCL3  
EXREF 77.00 ppm  
BF 0.12 Hz  
RGAIN 28

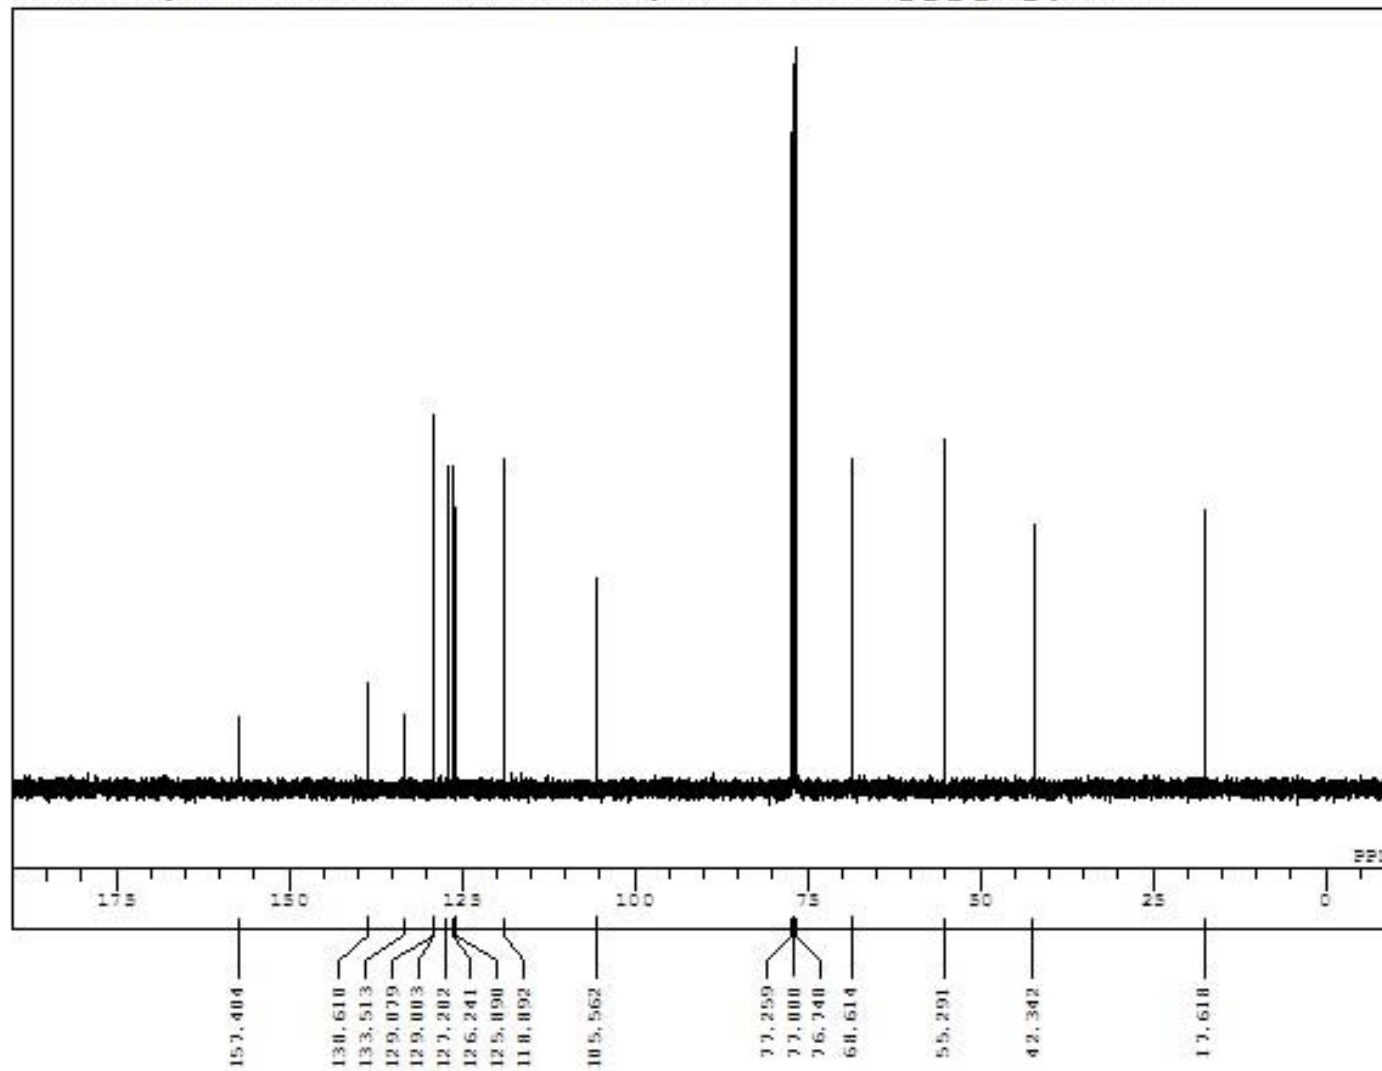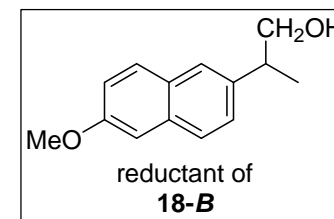

\\fao-c08\o-gchem-lab2\TeamG\17\ZODI-H-22E23\31\*x\ZAGzff\Alice\mk\_a\_8\_4\_id\_spectrum.als

```

DFILE mk_a_8_4_id_spectrum.als
COMENT Single Pulse Experiment
DATIM 2011-08-31 13:21:24
OBNUC 1H
EXMDD single_pulse.exp
OBFRQ 500.16 MHz
OBSET 2.41 KHz
OBFIN 6.01 Hz
POINT 16384
FREQU 10010.01 Hz
SCANS 16
AQTM 1.6368 sec
PD 4.0000 sec
FW 7.00 usec
IRNUC
OTEMP 21.7 c
SLVNT CDCL3
EXREF 0.00 ppm
BF 0.12 Hz
RGAIN 18
    
```

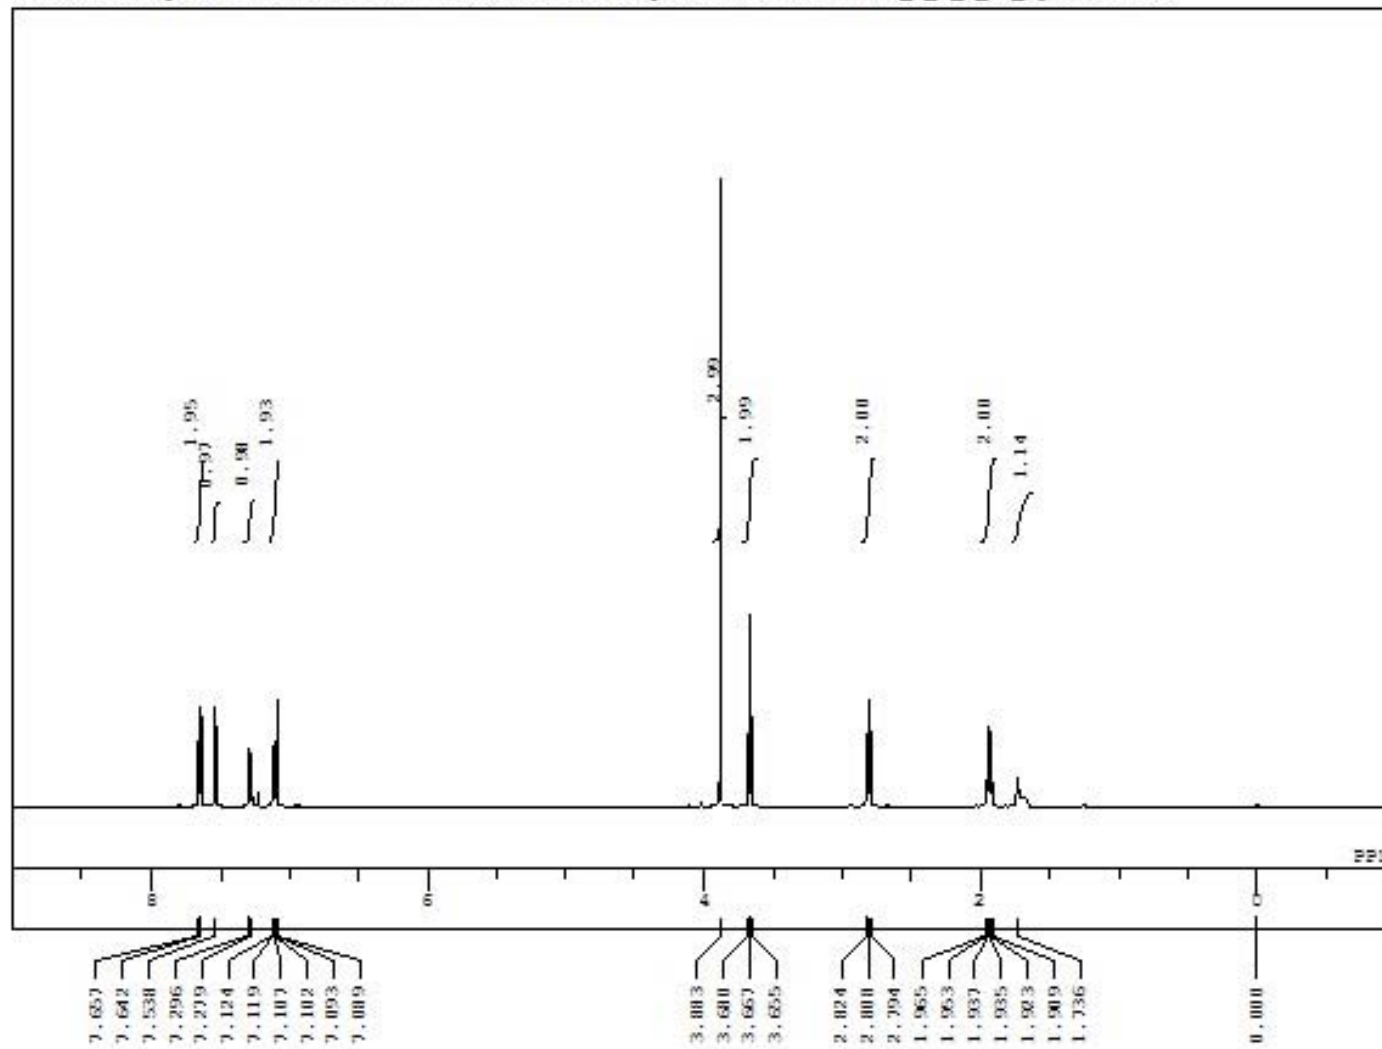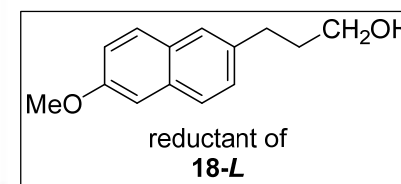

\\fao-c08\orgchem-lab2\TeamG\17\ZODI-H-22E23\Q\XJ\ZAGzff(f^)\Alice\mk\_a\_8\_4\_13c\_spectrum.ala

DFILE mk\_a\_8\_4\_13c\_spectrum.ala  
COMNT Single Pulse with Broadband  
DATIM 2011-09-14 12:14:36  
OBNUC 13C  
EXMDD single\_pulse\_dec  
OBFRQ 125.77 MHz  
OBSET 7.87 KHz  
OBFIN 4.21 Hz  
POINT 32768  
FREQU 31446.54 Hz  
SCANS 2100  
ACQTM 1.0420 sec  
PD 1.0000 sec  
FW1 4.47 usec  
IRNUC 1H  
OTEMP 23.1 c  
SLVMT CDCL3  
EXREF 77.00 ppm  
BF 0.12 Hz  
RGAIN 30

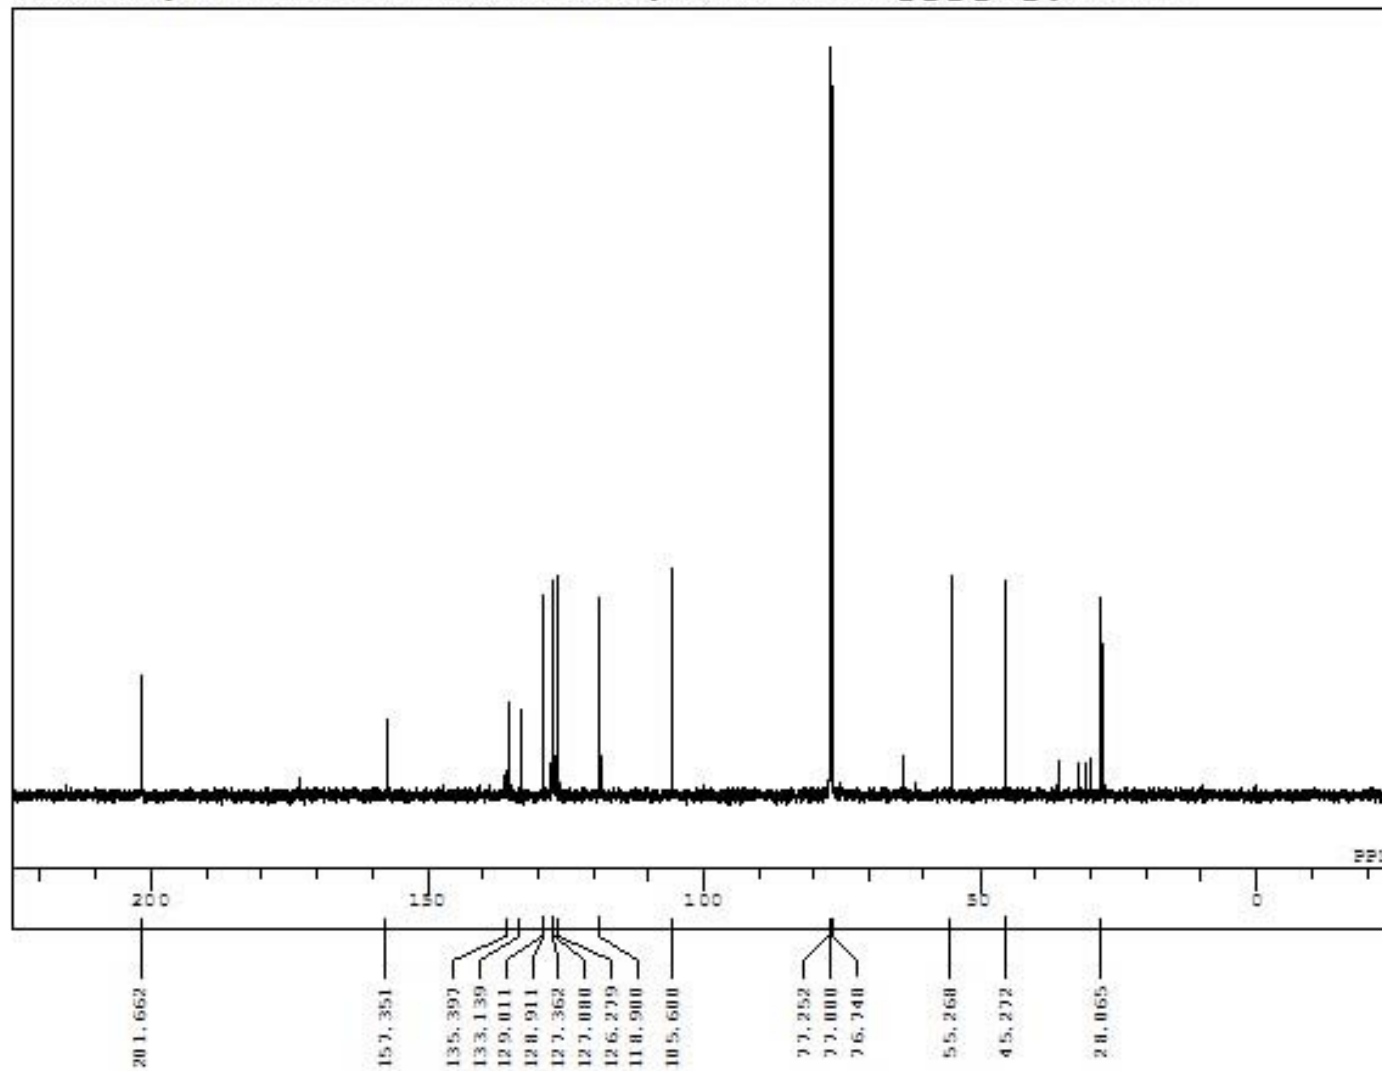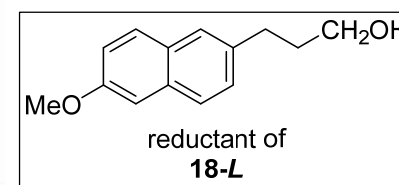

Supplement: c5ob00378d2.pdf [file c5ob00378d2.pdf]
